# Supplementary material for: Temporal trends in cardiovascular risk factors, lifestyle and secondary preventive medication for patients with myocardial infarction attending cardiac rehabilitation in Sweden 2006–2019: a registry-based cohort study
Source: PubMed Central journal article supplement — BMJ Open. 2023 May 12;13(5):e069770. doi: 10.1136/bmjopen-2022-069770 (PMC10186442; doi:10.1136/bmjopen-2022-069770), 2023-05-12
Supplement: bmjopen-2022-069770.draft_revisions.pdf [file bmjopen-2022-069770.draft_revisions.pdf]

# BMJ Open

BMJ Open is committed to open peer review. As part of this commitment we make the peer review history of every article we publish publicly available.

When an article is published we post the peer reviewers' comments and the authors' responses online. We also post the versions of the paper that were used during peer review. These are the versions that the peer review comments apply to.

The versions of the paper that follow are the versions that were submitted during the peer review process. They are not the versions of record or the final published versions. They should not be cited or distributed as the published version of this manuscript.

BMJ Open is an open access journal and the full, final, typeset and author-corrected version of record of the manuscript is available on our site with no access controls, subscription charges or pay-per-view fees (<http://bmjopen.bmj.com>).

If you have any questions on BMJ Open's open peer review process please email [info.bmjopen@bmj.com](mailto:info.bmjopen@bmj.com)

# BMJ Open

## Temporal trends in cardiovascular risk factors, lifestyle, and secondary preventive medication for patients with myocardial infarction attending cardiac rehabilitation in Sweden 2006-2019: a registry-based cohort study

|                               |                                                                                                                                                                                                                                                                                                                                                                                                                                                                                                                                                                                                                                                                                                                                                                                                                                                                                                 |
|-------------------------------|-------------------------------------------------------------------------------------------------------------------------------------------------------------------------------------------------------------------------------------------------------------------------------------------------------------------------------------------------------------------------------------------------------------------------------------------------------------------------------------------------------------------------------------------------------------------------------------------------------------------------------------------------------------------------------------------------------------------------------------------------------------------------------------------------------------------------------------------------------------------------------------------------|
| Journal:                      | <i>BMJ Open</i>                                                                                                                                                                                                                                                                                                                                                                                                                                                                                                                                                                                                                                                                                                                                                                                                                                                                                 |
| Manuscript ID                 | bmjopen-2022-069770                                                                                                                                                                                                                                                                                                                                                                                                                                                                                                                                                                                                                                                                                                                                                                                                                                                                             |
| Article Type:                 | Original research                                                                                                                                                                                                                                                                                                                                                                                                                                                                                                                                                                                                                                                                                                                                                                                                                                                                               |
| Date Submitted by the Author: | 01-Nov-2022                                                                                                                                                                                                                                                                                                                                                                                                                                                                                                                                                                                                                                                                                                                                                                                                                                                                                     |
| Complete List of Authors:     | Leosdottir, Margret; Lund University, Department of Clinical Sciences Malmö; Skanes universitetssjukhus Malmö, Department of Cardiology Hagstrom, Emil; Uppsala University, Department of Medical Sciences, Cardiology; Uppsala Clinical Research Center<br>Hadziosmanovic, Nermin; Uppsala University, Department of Medical Sciences, Cardiology<br>Norhammar, Anna; Karolinska Institutet; Capho Sankt Görans Sjukhus Lindahl, Bertil; Uppsala University, Department of Medical Sciences, Cardiology; Uppsala Clinical Research Center<br>Hambraeus, Kristina; Falun Hospital, Department of Cardiology<br>Jernberg, Tomas; Danderyd University Hospital, Department of Clinical Sciences<br>Bäck, Maria; Linköping University, Department of Medical and Health Sciences, Division of Physiotherapy; Sahlgrenska University Hospital, Department of Occupational Therapy and Physiotherapy |
| Keywords:                     | Myocardial infarction < CARDIOLOGY, REHABILITATION MEDICINE, Quality in health care < HEALTH SERVICES ADMINISTRATION & MANAGEMENT, Coronary heart disease < CARDIOLOGY, Risk management < HEALTH SERVICES ADMINISTRATION & MANAGEMENT                                                                                                                                                                                                                                                                                                                                                                                                                                                                                                                                                                                                                                                           |
|                               |                                                                                                                                                                                                                                                                                                                                                                                                                                                                                                                                                                                                                                                                                                                                                                                                                                                                                                 |

SCHOLARONE™  
Manuscripts

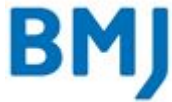

I, the Submitting Author has the right to grant and does grant on behalf of all authors of the Work (as defined in the below author licence), an exclusive licence and/or a non-exclusive licence for contributions from authors who are: i) UK Crown employees; ii) where BMJ has agreed a CC-BY licence shall apply, and/or iii) in accordance with the terms applicable for US Federal Government officers or employees acting as part of their official duties; on a worldwide, perpetual, irrevocable, royalty-free basis to BMJ Publishing Group Ltd ("BMJ") its licensees and where the relevant Journal is co-owned by BMJ to the co-owners of the Journal, to publish the Work in this journal and any other BMJ products and to exploit all rights, as set out in our [licence](#).

The Submitting Author accepts and understands that any supply made under these terms is made by BMJ to the Submitting Author unless you are acting as an employee on behalf of your employer or a postgraduate student of an affiliated institution which is paying any applicable article publishing charge ("APC") for Open Access articles. Where the Submitting Author wishes to make the Work available on an Open Access basis (and intends to pay the relevant APC), the terms of reuse of such Open Access shall be governed by a Creative Commons licence – details of these licences and which [Creative Commons](#) licence will apply to this Work are set out in our licence referred to above.

Other than as permitted in any relevant BMJ Author's Self Archiving Policies, I confirm this Work has not been accepted for publication elsewhere, is not being considered for publication elsewhere and does not duplicate material already published. I confirm all authors consent to publication of this Work and authorise the granting of this licence.

1  
2  
3 Temporal trends in cardiovascular risk factors, lifestyle, and secondary preventive medication  
4 for patients with myocardial infarction attending cardiac rehabilitation in Sweden 2006-2019:  
5 a registry-based cohort study  
6  
7  
8  
9

10  
11  
12 Margret Leosdottir <sup>a,b</sup>, Emil Hagström <sup>c,d</sup>, Nermin Hadziosmanovic<sup>c</sup>, Anna Norhammar<sup>e,f</sup>, Bertil  
13 Lindahl<sup>c,d</sup>, Kristina Hambræus<sup>g</sup>, Tomas Jernberg<sup>h</sup> and Maria Bäck<sup>i,j</sup>, for the SWEDEHEART-  
14  
15  
16 CR study group  
17  
18  
19

20  
21 <sup>a</sup>Department of Clinical Sciences Malmö, Faculty of Medicine, Lund University, Malmö,  
22 Sweden; <sup>b</sup>Department of Cardiology, Skane University Hospital, Malmö, Sweden; <sup>c</sup>Department  
23 of Medical Sciences, Cardiology, Uppsala University, Uppsala, Sweden; <sup>d</sup>Uppsala Clinical  
24 Research Centre, Uppsala, Sweden; <sup>e</sup>Institution of Medicine, Karolinska Institute at Karolinska  
25 University Hospital, Solna, Sweden; <sup>f</sup>Capio S:t Görans hospital, Stockholm, Sweden;  
26  
27 <sup>g</sup>Department of Cardiology, Falun Hospital, Falun, Sweden; <sup>h</sup>Department of Clinical Sciences,  
28 Danderyd Hospital, Karolinska Institute, Stockholm, Sweden; <sup>i</sup>Department of Medical and  
29 Health Sciences, Division of Physiotherapy, Linköping University, Linköping, Sweden;  
30  
31 <sup>j</sup>Department of Occupational Therapy and Physiotherapy, Sahlgrenska University Hospital,  
32 Gothenburg, Sweden  
33  
34  
35  
36  
37  
38  
39  
40  
41  
42  
43  
44  
45  
46

47 **Correspondence:** Margret Leosdottir, Department of Cardiology, Skane University Hospital,  
48 Jan Waldenströms gata 15 plan 3, 20502 Malmo, Sweden. Telephone number +46 732 561 536,  
49 margret.leosdottir@med.lu.se.  
50  
51  
52  
53

54  
55 **Word count:** 3927  
56  
57  
58  
59  
60

## Abstract

**Objectives.** Registries have been highlighted as means to improve quality of care. Here we describe temporal trends in risk factors, lifestyle, and preventive medication for patients after myocardial infarction (MI) registered in the quality registry SWEDEHEART.

**Design.** A registry-based cohort study.

**Setting.** All coronary care units and cardiac rehabilitation (CR) centres in Sweden.

**Participants.** Patients attending a CR visit at one-year post-MI 2006-2019 were included (n=81363, 18-74 years, 74.7% men).

**Outcome measures.** Outcome measures at one-year follow-up included blood pressure (BP) <140/90 mmHg, low-density lipoprotein-cholesterol (LDL-C) <1.8 mmol/L, persistent smoking, overweight/obesity, central obesity, diabetes prevalence, inadequate physical activity, and prescription of secondary preventive medication. Descriptive statistics and testing for trends were applied.

**Results.** The proportion of patients attaining the targets for BP <140/90 mmHg increased from 65.2% (2006) to 86.0% (2019), and LDL-C <1.8 mmol/L from 29.8% (2006) to 66.9% (2019,  $p<0.0001$  both). While smoking at the time of MI decreased (32.0% to 26.5%,  $p<0.0001$ ), persistent smoking at one-year was unchanged (42.8% to 43.2%,  $p=0.672$ ) as was the prevalence of overweight/obesity (71.9% to 72.9%,  $p=0.559$ ). Central obesity (50.5% to 57.0%), diabetes (18.2% to 27.2%) and patients reporting inadequate levels of physical activity (57.0% to 61.5%) increased ( $p<0.0001$  for all). From 2007, >90.0% of patients were prescribed statins and approximately 98% antiplatelet and/or anticoagulant therapy. Angiotensin-converting enzyme inhibitor/angiotensin receptor blocker prescription increased from 68.7% (2006) to 80.2% (2019,  $p<0.0001$ ).

1  
2  
3 **Conclusions.** While little change was observed for persistent smoking and overweight/obesity,  
4 large improvements were observed for LDL-C and BP target achievements and prescription of  
5 preventive medication for Swedish patients after MI 2006-2019. Compared to published results  
6 from patients with coronary artery disease in Europe during the same period, these  
7 improvements were considerably larger. Continuous auditing and open comparisons of CR  
8 outcomes might possibly explain some of the observed improvements and differences.  
9  
10  
11  
12  
13  
14  
15  
16  
17  
18

19 **Abstract word count:** 299  
20  
21  
22

23  
24 **Keywords:** Cardiac rehabilitation, risk factors, registry, myocardial infarction, secondary  
25 prevention, SWEDEHEART  
26  
27  
28  
29

### 30 **Article summary**

#### 31 *Strengths and limitations of this study*

- 32  
33  
34  
35 • In this paper we report changes over time in risk factor burden, lifestyle variables, and  
36 secondary preventive medication for patients attending cardiac rehabilitation (CR) in  
37 Sweden between 2006 and 2019. Comparisons to published results from patients with  
38 coronary artery disease in Europe during the same period are presented.  
39  
40  
41  
42
- 43  
44 • The major strength of the study is the broad representability and national coverage of  
45 data, but all patients who suffered a myocardial infarction (MI) and were followed in  
46 the Swedish quality registry SWEDEHEART were included. More than 75% of all MI  
47 patients under the age of 75 are registered in SWEDEHEART and attend a one-year CR  
48 follow-up visit.  
49  
50  
51
- 52  
53 • Using descriptive statistics and testing for trends, proportion of patients attaining blood  
54 pressure (BP) <140/90 mmHg, low-density lipoprotein-cholesterol (LDL-C) <1.8  
55  
56  
57  
58  
59  
60

1  
2  
3 mmol/L, persistent smoking, overweight/obesity, central obesity, diabetes prevalence,  
4  
5 inadequate physical activity, and prescription of secondary preventive medication were  
6  
7 explored.

- 8  
9  
10 • The major limitation of the study is the lack of data describing MI patients not attending  
11  
12 CR and on those  $\geq 75$  years of age.  
13  
14

## 15 16 17 **Introduction**

18  
19 Treating cardiovascular risk factors and adopting healthy behaviours after myocardial  
20  
21 infarction (MI) is the most effective way to reduce recurrent cardiovascular events (1, 2). Based  
22  
23 on abundant and continuously accumulating evidence, the European Society of Cardiology  
24  
25 (ESC) regularly publishes guidelines on cardiovascular disease prevention in clinical practice  
26  
27 (3). Secondary prevention is usually provided through cardiac rehabilitation (CR) - a complex  
28  
29 intervention entailing the optimal use of cardio-protective medication, exercise training,  
30  
31 behavioural modification, patient education, and psychosocial counselling (4). In the latest ESC  
32  
33 prevention guidelines, participation in CR post-MI is given the highest possible  
34  
35 recommendation and level of evidence (3). Still, implementing the guidelines in clinical  
36  
37 practice has proven to be a challenge, with goal attainment in CR being far from optimal (5, 6).  
38  
39 Especially it seems challenging to reach lifestyle associated targets such as being adequately  
40  
41 physically active and active smokers at the time of the MI being abstinent from smoking.  
42  
43 Furthermore, only marginal improvements have been observed in goal attainment for blood  
44  
45 pressure (BP) and low-density lipoprotein cholesterol (LDL-C) during the last ten years despite  
46  
47 increasing availability of more effective pharmacotherapy (5).  
48  
49  
50  
51  
52

53  
54 Systematically monitoring quality of care, structure, and process of delivery  
55  
56 within CR has been highlighted as a possible way to increase prevention target attainment (7-  
57  
58 11). The Swedish Web-system for Enhancement and Development of Evidence-based care in  
59  
60

1  
2  
3 Heart disease Evaluated According to Recommended Therapies (SWEDEHEART) is a  
4 nationwide quality registry that records patient characteristics, treatments, and outcomes of  
5 consecutive patients with MI admitted to coronary care units in Sweden (12). Registration of  
6 CR quality and process-based metrics for patients after an MI started in 2005. Since 2006 data  
7 has been collected for patients under the age of 75 at two routine follow-up visits within CR -  
8 at two-months and one-year post-MI (13, 14). Referrals to CR are automatically generated  
9 through the electronic registry system for all MI patients and since 2016 more than 75% of all  
10 eligible patients, who are alive at one-year after the acute event, attend the one-year CR follow-  
11 up visit (15). Data from SWEDEHEART is available online and is updated continuously,  
12 facilitating open comparisons between CR programs in the country (16).  
13  
14  
15  
16  
17  
18  
19  
20  
21  
22  
23  
24  
25

26 The objective of this study was to describe temporal trends 2006-2019 in risk  
27 factor prevalence, lifestyle, and prescription of secondary preventive medication at one-year  
28 after MI for patients attending CR in Sweden, hypothesising that a national quality registry can  
29 contribute to improving outcomes in CR.  
30  
31  
32  
33  
34  
35  
36  
37

## 38 **Methods**

### 39 *Patient population and settings*

40 In this retrospective registry-based cohort study, data on all patients i) with a Swedish national  
41 identification number, ii) aged 18-74 years, iii) admitted for a first time or recurrent MI (ICD  
42 codes I21, I22 or I23), and iv) having a one-year CR follow-up visit registered in  
43 SWEDEHEART between January 1<sup>st</sup> 2006 and December 31<sup>st</sup> 2019 were used. Since patients  
44 with recurrent MI are included in SWEDEHEART, the same patient can be registered on  
45 several occasions, although not more than once per year since each individual patient can only  
46 generate one SWEDEHEART-based follow-up per year. Until 2018 it was mandatory to  
47 register patients <75 years of age, while registration of those 75 years or older was optional.  
48  
49  
50  
51  
52  
53  
54  
55  
56  
57  
58  
59  
60



1  
2  
3 For this reason, we chose to apply the age limit of 18-74 years throughout the whole period in  
4 the current study. No other exclusion criteria were applied.  
5  
6  
7  
8  
9

### 10 *Patient involvement*

11 Patients were not involved in the design or conduct of the current study. The SWEDHEART  
12 registry's steering group has, however, included a patient representative for many years. The  
13 steering group is involved in decisions concerning variables included in the registry and how  
14 results generated from registry data are disseminated to the general public.  
15  
16  
17  
18  
19  
20  
21  
22

### 23 *Data collection*

#### 24 Hospitalization data

25  
26 Detailed description of the SWEDHEART registry has previously been published (12, 13). In  
27 short, the registry includes more than 100 variables collected during hospitalization, describing  
28 patient characteristics and acute MI care (12). These include age, sex, smoking status (current  
29 smoker, previous smoker [stopped smoking >1 month] or never smoker), history of diabetes,  
30 hypertension, atherosclerotic cardiovascular disease (ASCVD: MI, percutaneous coronary  
31 intervention [PCI], coronary artery by-pass grafting [CABG] or stroke), and current  
32 pharmacotherapy, collected from electronic medical records and by self-report. Data on  
33 race/ethnicity is not available in SWEDHEART. Height (cm) and weight (kg) is collected,  
34 measured during hospitalization or self-reported, and body-mass index (BMI, kg/m<sup>2</sup>)  
35 calculated. Waist circumference is not measured during hospitalization. Systolic and diastolic  
36 blood pressures (BP, mmHg) are registered. Blood samples collected include total cholesterol,  
37 triglycerides, low-density lipoprotein cholesterol (LDL-C), high-density lipoprotein cholesterol  
38 (HDL-C), fasting plasma glucose, and HbA1c (for patients with diabetes only). In  
39 SWEDHEART, estimated LDL-C according to the Friedewald formula:  $LDL-C = total$   
40  
41  
42  
43  
44  
45  
46  
47  
48  
49  
50  
51  
52  
53  
54  
55  
56  
57  
58  
59  
60

1  
2  
3 cholesterol – HDL-C – (0,45 x triglycerides) is used to minimize inter-laboratory differences in  
4  
5 LDL-C (17). In case of triglycerides >4.5 mmol/L or missing values on total cholesterol, HDL-  
6  
7 C, or triglycerides, directly measured LDL-C is used instead. In the SWEDEHEART user  
8  
9 manual it is recommended that laboratory measures are performed according to local laboratory  
10  
11 routines.  
12

### 13 Cardiac rehabilitation data

14  
15  
16 Approximately 80 variables are collected at CR visits at two-months (time frame 6-10 weeks)  
17  
18 and one-year (time frame 11-13 months) post-MI (13). These include weight and waist  
19  
20 circumference, systolic and diastolic BP, blood samples (lipids, fasting plasma glucose, and in  
21  
22 patients with diabetes HbA1c), smoking status and current pharmacotherapy. Additionally,  
23  
24 patients report how many days during the last week they have been physically active for a  
25  
26 minimum of 30 minutes (at least 10 minutes at a time) at an intensity that will induce shortness  
27  
28 of breath and a slightly increased pulse, corresponding to a brisk walk.  
29  
30  
31

32  
33 All data in SWEDEHEART is registered online. Data validity is continuously  
34  
35 monitored, with sampling confirming >95% agreement with data from medical records (12,  
36  
37 13).  
38  
39  
40  
41

### 42 *Exposure and outcome variables*

43  
44 Exposure in this study was defined as the calendar year of the one-year follow-up visit.  
45  
46 Outcome variables at one-year follow-up included the following: BP <140/90 mmHg (both  
47  
48 systolic and diastolic BP targets fulfilled, same goal irrespective of diabetes status); LDL-C  
49  
50 <1.8 mmol/L; diabetes prevalence; persistent smoking (proportion of smokers at the time of MI  
51  
52 who were still smoking at one-year follow-up); inadequate physical activity (being physically  
53  
54 active [as defined above] <5 days/week); overweight/obesity (BMI  $\geq 25$  kg/m<sup>2</sup>); central obesity  
55  
56 (waist circumference  $\geq 102$  cm for men and  $\geq 88$  cm for women); prescription of secondary  
57  
58  
59  
60

1  
2  
3 preventive medication: lipid lowering drugs (statins and/or ezetimibe), angiotensin converting  
4 enzyme inhibitors (ACEi) or angiotensin receptor blockers (ARB), beta blockers, antiplatelet  
5 agents (acetylsalicylic acid [ASA] and/or P2Y<sub>12</sub>-receptor antagonists) and anticoagulants  
6 (warfarin or direct oral anticoagulants).  
7  
8  
9  
10  
11  
12  
13

#### 14 *Statistical analysis*

15  
16 The distribution of continuous variables was assessed by visual inspection of histograms and  
17 Q-Q plots. Most continuous variables were non-normally distributed, and are presented as  
18 medians (quartile 1, quartile 3), apart from delta values which are presented as means ±standard  
19 deviations (SD). Data for categorical variables is presented as percentages. Trend tests were  
20 performed using Cochran-Armitage trend test for categorical variables and Wilcoxon type test  
21 for continuous variables. To compare data between years 2006 and 2019, Chi-square test was  
22 used for categorical variables and Wilcoxon rank sum test for continuous variables. Outcomes  
23 were analysed as dichotomized variables. Median values for continuous outcome variables and  
24 mean delta values between baseline (time of index event) were also analysed. For waist  
25 circumference delta was based on the two-month and one-year follow-up visit measurements.  
26 No imputation was performed on missing data. Data was analysed using SAS version 9.4 (SAS  
27 Institute, Cary, North Carolina, USA). A 2-sided p value of <0.05 was considered statistically  
28 significant.  
29  
30  
31  
32  
33  
34  
35  
36  
37  
38  
39  
40  
41  
42  
43  
44  
45  
46  
47  
48

#### 49 *Ethical considerations*

50  
51 The need for signed informed consent by patients for inclusion in Swedish quality registries has  
52 collectively been waived in Sweden. Upon hospital admission, MI patients are informed  
53 verbally and in writing by a nurse or physician about data being collected and entered in the  
54 registry. However, all patients have the right to deny registration and the right upon request to  
55  
56  
57  
58  
59  
60

1  
2  
3 be removed from the registry at any time. Opt-out is extremely rare, counting less than ten cases  
4 per year. The study complies with the Declaration of Helsinki and was approved by The  
5  
6 Swedish Ethical Review Authority (registration number: 2019-04277).  
7  
8  
9

## 10 11 12 **Results**

### 13 14 *Patient characteristics during hospitalization*

15  
16 Between 2006 and 2019, 81363 MI cases were registered in SWEDEHEART, representing  
17  
18 78679 individual patients 18-74 years of age at the time of the acute event who subsequently  
19  
20 attended a one-year follow-up registry visit within CR. Patients were predominantly male, the  
21  
22 proportion increasing slightly during the period from 73.5% in 2006 to 75.2% in 2019 (p-trend  
23  
24 <0.0001). The median (q1, q3) age was 63.0 (57.0, 69.0) years in 2006 and 65.0 (58.0-70.0)  
25  
26 years in 2019 (p-trend <0.0001). Further patient characteristics can be seen in Fig. 1 and Tables  
27  
28 S1-S3. The most prominent changes observed during the period were a decrease in the  
29  
30 proportion of smokers from 32.0% to 26.5% (p-trend <0.0001), an increase in the proportion of  
31  
32 overweight and obese patients (BMI  $\geq 25$  kg/m<sup>2</sup>) from 70.7% to 74.1% (p-trend <0.0001), and  
33  
34 an increase in the use of lipid-lowering drugs (statins and/or ezetimibe) (24.5% to 28.6%, p-  
35  
36 trend=0.004) or antihypertensive drugs (ACEi/ARB, beta blockers, diuretics and/or calcium  
37  
38 channel blockers) (47.6% to 51.2%, p-trend <0.0001) prior to admission (Fig. 1). The  
39  
40 proportion of patients being revascularized (by PCI or CABG) during hospitalization and the  
41  
42 proportion being prescribed statins, ezetimibe, ACEi/ARB, and P2Y<sub>12</sub>-receptor antagonist  
43  
44 therapy at discharge increased during the observed period (p-trend <0.0001 for all), while the  
45  
46 proportion receiving beta blockers at discharge decreased (p-trend <0.0001) (Table S3).  
47  
48  
49  
50  
51  
52  
53  
54  
55

### 56 *Blood pressure, lipids, and diabetes*

57  
58  
59  
60

1  
2  
3 The proportion of patients achieving BP <140/90 mmHg at the one-year follow-up visit  
4 increased from 65.2% in 2006 to 86.0% in 2019 (p-trend <0.0001) (Fig 2). Regarding LDL-C,  
5 29.8% were treated to the <1.8 mmol/L target in 2006, increasing to 66.9% in 2019 (p-trend  
6 <0.0001), with 30.4% having an LDL-C of <1.4 mmol/L in 2019 (Fig 2). Mean delta values for  
7 systolic and diastolic BP and LDL-C between hospitalization and one-year follow-up also  
8 increased during the observed period (p for trend <0.0001 for all) (Fig. 3). The one-year median  
9 SBP, DBP, total cholesterol, LDL-C, and triglycerides decreased over the period, while HDL-  
10 C remained unchanged (Table S4).  
11  
12  
13  
14  
15  
16  
17  
18  
19  
20  
21

22 The prevalence of diabetes at the one-year follow-up increased from 18.2% in 2006 to 27.2%  
23 in 2019 (p-trend <0.0001) (Fig. 4). Between 2006 and 2013 there was a minimal difference  
24 between the prevalence of diabetes at hospitalization and at one-year follow-up ( $\pm 1\%$ -point).  
25 Since 2014, however, the difference increased, in 2019 being 4.6%-points higher at the one-  
26 year follow-up. HbA1c (patients with diabetes only) at the one-year follow-up decreased from  
27 56 mmol/mol to 52 mmol/mol (p-trend <0.0001) while the delta value between hospitalization  
28 and one-year remained unchanged (Tables S4-S5). Fasting glucose at one-year (all patients)  
29 increased from 5.7 mmol/L to 6.0 mmol/L over the period (p-trend <0.0001) (Table S4).  
30  
31  
32  
33  
34  
35  
36  
37  
38  
39  
40  
41  
42

### 43 *Lifestyle*

44 The prevalence of persistent smoking, inadequate physical activity, overweight/obesity, and  
45 central obesity at one-year post-MI can be seen in Fig. 4. Persistent smoking, i.e., the proportion  
46 of smokers at the time of MI who were still smoking at the one-year follow-up, remained  
47 unchanged over the period (42.8% in 2006 and 43.2% 2019, p-trend=0.672). The proportion of  
48 patients reporting inadequate physical activity increased during the observed period from  
49 57.0% to 61.5% (p-trend <0.0001). While the prevalence of patients who were overweight or  
50 obese at hospitalization increased, the proportion at one-year follow-up was similar (71.9% to  
51  
52  
53  
54  
55  
56  
57  
58  
59  
60

1  
2  
3 72.9%, p-trend=0.559). In 2006-2015 an increase in BMI between baseline and one-year  
4 follow-up was observed (between 0.04 and 0.30 kg/m<sup>2</sup>), while in 2016-2019 the difference was  
5  
6 negative (between -0.01 and -0.15 kg/m<sup>2</sup>, p-trend <0.0001) (Table S5). The prevalence of  
7  
8 central obesity increased from 50.5% in 2006 to 57.0% in 2019 (p-trend <0.0001). Yearly  
9  
10 median values at one-year follow-up for number of days during the last week the patients had  
11  
12 been physically active, BMI, and waist circumference are shown in Table S4.  
13  
14  
15  
16  
17  
18  
19

### 20 *Secondary preventive medication*

21  
22 The use of secondary preventive medication at the one-year follow-up visit can be seen in Fig.  
23  
24 5. Since 2007 more than 90% of all patients were prescribed statins. Between 4% and 6% of  
25  
26 the patients were prescribed ezetimibe prior to 2014 where after its use increased successively  
27  
28 to 29.8% in 2019 (p-trend <0.0001). Approximately 98% were prescribed either an antiplatelet  
29  
30 or anticoagulant therapy throughout the period, with the proportion of patients receiving  
31  
32 anticoagulant therapy doubling from 6.4% in 2006 to 12.0% in 2019 (p-trend <0.0001).  
33  
34 ACEi/ARB prescription increased from 68.7% to 80.2% (p-trend <0.0001) while the use of beta  
35  
36 blockers decreased from 86.4% to 76.7% (p-trend <0.0001).  
37  
38  
39  
40  
41  
42  
43

### 44 **Discussion**

45  
46 In this study of temporal trends in risk factor control and use of secondary preventive  
47  
48 medication in post-MI patients attending CR in Sweden 2006-2019, a considerable  
49  
50 improvement in BP and LDL-C goal achievement and use of evidence-based pharmacotherapy  
51  
52 was observed. On the other hand, changes in lifestyle were less encouraging, with the  
53  
54 proportion of persistent smokers at one-year remaining unchanged, and prevalence of  
55  
56 inadequate physical activity, central obesity, as well as diabetes increasing.  
57  
58  
59  
60

### *Blood pressure, lipids, and diabetes*

In the EUROASPIRE surveys patients aged 18-79 years with coronary artery disease (CAD) were interviewed and examined at approximately one year after a first or recurrent coronary event (acute MI, unstable angina, or revascularization), to determine whether guidelines on CR were followed in clinical practice (5, 6). The III-V surveys were conducted over a period approximately matching our current study period (EUROASPIRE III 2006-2007, IV 2012-2013 and V 2016-2017), the patients had similar initiating events, and the mean age and gender proportions were comparable to the SWEDEHEART population (Table S6), giving a good opportunity to compare our results to European data. In our study, the proportion of patients achieving the BP goal of <140/90 mmHg increased from 65.2% to 86.0% between 2006 and 2019, compared to an increase from 44.0% to 58.0% between EUROASPIRE III and V (Fig. 6) (5, 6). As such, the proportion of patients achieving the BP goal was considerably higher (approximately 20%-points) during the whole period in SWEDEHEART. There was an even larger difference in the proportion of patients reaching the LDL-C target of <1.8 mmol/L, increasing from 29.8% (2006) to 66.9% (2019) (37%-point improvement) in SWEDEHEART, compared to 20.9% vs 29.0% (8%-point improvement) between EUROASPIRE III and V (Fig. 6). One reasonable explanation for the large difference in proportion of patients achieving treatment targets for BP and LDL-C in SWEDEHEART compared to EUROASPIRE could be that all patients in our study participated in CR to some extent, compared to 35-40% in the EUROASPIRE cohorts (18, 19). Participation in CR has been shown to increase adherence to secondary preventive medication and the proportion of patients reaching risk factor goals (20) as well as improving prognosis (2). Somewhat contradictory though, data from EUROASPIRE IV on risk factor target achievement showed no difference in the proportion of patients reaching targets for BP and LDL-C when comparing attenders and non-attenders in CR (19). Another possible explanation for the more pronounced improvement in target attainment in



1  
2  
3 SWEDEHEART compared to EUROASPIRE might be the possibility of continuous self-audit  
4  
5 of publicly available data for CR centres reporting to SWEDEHEART, as only a minority of  
6  
7 the countries participating in EUROASPIRE had quality registries or audits comparable to  
8  
9 SWEDEHEART. Among patients with CAD attending CR in Austria, where a well-functioning  
10  
11 CR registry has been in use since 2001 (7), 85% of patients between 2005 and 2015 reached  
12  
13 the systolic BP goal of <140 mmHg (21). Similarly, according to annual reports from the Danish  
14  
15 CR Database on patients with CAD attending CR, which started in 2015, the proportion of  
16  
17 patients reaching the LDL-C goal of <1.8 mmol/L increased from 54% in 2015 to 63% in 2019  
18  
19 (22, 23), figures aligning well with our results for the same years. The joint observations from  
20  
21 these three registries (SWEDEHEART, Austrian registry and Danish Registry) support the  
22  
23 conclusion that benchmarking quality improvement at a local and national level, and providing  
24  
25 opportunities for open comparisons between centres, can positively impact quality of care (7,  
26  
27 24, 25).

28  
29  
30  
31  
32  
33 An interesting observation in our data was the increased difference in diabetes  
34  
35 prevalence between hospitalization and one-year follow-up towards the end of the observed  
36  
37 period. Also, median HbA1c values among patients with diabetes decreased. This possibly  
38  
39 reflects heightened awareness and more structured routines for diagnosing diabetes in patients  
40  
41 after an MI, with patients with milder forms of glucose disturbances being diagnosed. More  
42  
43 patients being diagnosed should in the long-term positively impact prognosis (26, 27). The  
44  
45 increase in fasting glucose values in the whole population, paralleled by increased prevalence  
46  
47 of central obesity, further underlines the importance of vigilant screening and treatment of  
48  
49 diabetes in the post-MI population.  
50  
51  
52  
53  
54  
55

### 56 *Lifestyle*

57  
58  
59  
60



1  
2  
3 Approximately 30% of patients were smokers at the time of the index event in both the  
4  
5 SWEDEHEART registry and the EUROASPIRE surveys. The proportion of persistent smokers  
6  
7 at one-year after the event, however, was generally higher in EUROASPIRE than in  
8  
9 SWEDEHEART (Fig. S1) (5, 28). The fact that Sweden has the lowest proportion of daily  
10  
11 smokers in Europe might partly explain the higher success rate for smoking cessation in our  
12  
13 data. In contrary with the lack of difference in BP and LDL-C target achievement between CR  
14  
15 attenders and non-attenders in EUROASPIRE, there was a substantial difference between  
16  
17 attenders and non-attenders in smoking cessation rates, with 47% and 43% of CR attenders  
18  
19 being persistent smokers in EUROASPIRE III (2006-2007) and IV (2011-2012), compared to  
20  
21 54% and 53% of the non-attenders (18, 19). The corresponding figures in SWEDEHEART (all  
22  
23 patients defined as attenders) during the same years were 42% (2006-2007) and 45% (2011-  
24  
25 2012). In both cohorts, however, there was no improvement in smoking cessation rates during  
26  
27 the observed periods. The same can be seen in the British National Audits for CR (NACR)  
28  
29 2016-2019 (29) and the Danish CR Database 2015-2019 (23). Observational studies have  
30  
31 shown that smoking cessation post-MI results in a 36% relative risk reduction in total mortality  
32  
33 (30). The smoking cessation rates among CR attenders in the EUROASPIRE surveys and  
34  
35 patients registered in SWEDEHEART, when compared to the considerably higher figures for  
36  
37 non-attenders from EUROASPIRE, underline the importance of CR attendance for supporting  
38  
39 tobacco abstinence. At the same time, it is discouraging to see no improvement in smoking  
40  
41 cessation rates in any of the reviewed datasets.

42  
43  
44  
45  
46  
47  
48  
49 The proportion of patients reporting insufficient physical activity at the one-year  
50  
51 follow-up increased during the observed period. As different questionnaires for assessing  
52  
53 physical activity have been used in the surveys and audits cited here, direct comparisons cannot  
54  
55 be made. Generally, though, in EUROASPIRE, the level of physical activity in all surveys was  
56  
57  
58  
59  
60

1  
2  
3 suboptimal and did not improve between surveys (5, 6), while the proportion of patients  
4 classified as physically active increased somewhat in the NACR reports 2016-2019 (29).  
5  
6

7  
8 While the prevalence of overweight/obesity at the time of the MI increased during  
9 the study period, the proportion of overweight/obese patients at the one-year follow-up visit  
10 remained unchanged (72-73%). This might partly be explained by a slight weight gain between  
11 hospitalization and one-year follow-up during the first half of the observed period, while a  
12 minimal weight loss was observed during the latter half. The clinical relevance of this  
13 observation is, however, uncertain. No change in the proportion of obese patients was observed  
14 in NACR 2016-2019 (29) or the EUROASPIRE surveys, where just over 80% were overweight  
15 or obese (5, 6) (Fig. S1). The prevalence of central obesity was similar in our study and in  
16 EUROASPIRE and increased to the same extent (by approximately 10%-points) during the  
17 observed period (5, 6).  
18  
19  
20  
21  
22  
23  
24  
25  
26  
27  
28  
29

30  
31 In a recently published paper based on data from EUROASPIRE IV and V, poor  
32 adherence to lifestyle changes were addressed (20). The authors concluded that while adherence  
33 to lifestyle advice was better among patients who had attended CR, an increased focus on  
34 behavioural change within CR to address unhealthy lifestyles is strongly needed. With all  
35 patients in our cohort having participated in CR to some extent, data on lifestyle being  
36 monitored and openly compared annually in the SWEDEHEART registry, and no visible  
37 change for the better seen for more than a decade, our results strongly support this conclusion.  
38  
39  
40  
41  
42  
43  
44  
45  
46  
47  
48

#### 49 *Cardioprotective medication*

50  
51 According to our study the use of lipid lowering drugs was high during the whole period. More  
52 than 90% of the patients were prescribed statins at the one-year follow-up visit throughout the  
53 observed period and ezetimibe use increased rapidly after 2015, reaching 29.8% in 2019. In  
54 2015-2109 more than 94% of all patients were prescribed statins and/or ezetimibe. Meanwhile,  
55  
56  
57  
58  
59  
60

1  
2  
3 the use of lipid lowering therapy including statins, ezetimibe, fibrates, bile acid sequestrants,  
4 and nicotinic acid, increased from approximately 80% of patients in EUROASPIRE III to 84%  
5 in EUROASPIRE V (5, 28, 31) (Fig. S2). In the CR attendance analyses from the  
6  
7  
8 in EUROASPIRE III and IV surveys, compared to non-attenders, the proportion of CR attenders  
9  
10  
11  
12 on lipid lowering therapy was considerably higher, or 83% vs 78% (EAIII) and 88% vs 85%  
13  
14 (EAIIV), respectively (18, 19). Data on the use of cardioprotective medication from the Austrian  
15  
16 registry or the British National Audit for CR (NACR) has to our knowledge not been published.  
17  
18 In annual reports from the Danish CR database, during 2016-2019, between 93-96% of CAD  
19  
20 patients were prescribed statins at the end of CR (23). According to our study the use of  
21  
22 ACEi/ARB increased from 64.9% in 2006 to 79.5% in 2019 while patients prescribed  
23  
24 ACEi/ARB in EUROASPIRE III was 71% and 75% in EUROASPIRE V (Fig. S2) (5, 28, 31).  
25  
26 In the EUROASPIRE III and IV, the use of ACEi/ARB and BP-lowering medication was  
27  
28 significantly higher in CR attenders than in non-attenders, although the difference was not as  
29  
30 large as for lipid lowering treatment (18, 19). While conclusions about the influence of auditing  
31  
32 on cardioprotective medication prescription in Sweden are hard to draw, generally it can be  
33  
34 concluded that the use of cardioprotective medication in our and other surveys has been high  
35  
36 and has increased both in Sweden and Europe in general during the observed period.  
37  
38  
39  
40  
41  
42  
43  
44  
45

### 46 *Strengths and limitations*

47  
48 The major strength of this study is the broad representability and national  
49  
50 coverage of data, with more than 75% of all MI patients under the age of 75 being registered in  
51  
52 SWEDEHEART and attending a one-year CR follow-up visit since 2016. At the same time, a  
53  
54 major limitation is the lack of data describing MI patients not attending CR and on those  $\geq 75$   
55  
56 years of age. This might have led to a positive bias in the results. Also, the coverage on center-  
57  
58 level during the first years was low and representability therefore not as extensive. Comparing  
59  
60

our data with other survey and audit data is limited by differences in patient selections, different rates of CR participation, time of follow-up, differences in measurement methods (i.e., questionnaires, self-report), and definitions (i.e., physical inactivity).

### *Conclusion*

Between 2006-2019, an increasing proportion of patients in Sweden reached secondary preventive goals for BP and LDL-C one year after an MI. The proportion of patients treated with evidence-based secondary preventive medication also increased. Both levels of BP and LDL-C, as well as use of pharmacological treatment were comparable with data from other similar European quality registries or audits used on a national level for benchmarking. The trends were more favourable than that observed in EUROASPIRE, data from which represents several European countries where audits were not widely available. The results may indicate that national quality registries can contribute to improving outcomes in CR. Less encouraging, no changes were seen the proportion of current smokers at the time of the MI who are abstinent at one-year, more patients reported inadequate levels of physical activity, and the proportion of patients with central obesity and diabetes increased, as was observed in EUROASPIRE. These observations bare witness of a large unmet need to prioritize patient support to improve lifestyle after an MI.

### **Acknowledgements**

None.

### **Funding**

1  
2  
3 This research received no specific grant from any funding agency in the public, commercial or  
4 non-for-profit sectors.  
5  
6  
7  
8  
9

### 10 **Data sharing statement**

11  
12 The data used in this study is based on the SWEDEHEART registry. Access to data from the  
13 registry needs to be applied for and third-party data usage is not allowed, irrespective of whether  
14 the data contain potentially identifying or sensitive data or not. Instead, given ethical study  
15 approval from the Swedish Ethical Review Authority, access to SWEDEHEART data  
16 supporting the present findings can be applied for from the Uppsala Clinical Research Center  
17 (UCR) in Sweden. Further information can be found on the UCR [www.ucr.uu.se/en/](http://www.ucr.uu.se/en/) and  
18 Swedish Ethical Review Authority [etikprovningmyndigheten.se/](http://etikprovningmyndigheten.se/) websites.  
19  
20  
21  
22  
23  
24  
25  
26  
27

28 One co-author (NH) had primary responsibility for the study data and takes  
29 responsibility for its integrity and the data analysis. Analytical methods and other study material  
30 are available upon reasonable request to the corresponding author.  
31  
32  
33  
34  
35  
36  
37

### 38 **A competing interests statement**

39  
40 All authors except NH are or have been engaged in the SWEDEHEART registry. Otherwise,  
41 the authors have no conflicts of interest to declare.  
42  
43  
44  
45  
46

### 47 **Author contributions**

48  
49 M.L., E.H., and M.B. contributed to the conception and design of the work. A.N., B.L., K.H.  
50 and T.J. offered medical expertise and guidance. N.H. conducted all data analysis. M.L. drafted  
51 the manuscript. All other authors critically revised the manuscript. All approved the final  
52 version of the manuscript.  
53  
54  
55  
56  
57  
58  
59  
60

## Figure legends

**Fig. 1.** Patient characteristics as registered during MI hospitalization for patients attending the one-year follow-up visit within CR in Sweden 2006-2019. <sup>a</sup>BMI  $\geq 25$  kg/m<sup>2</sup>; <sup>b</sup>prior MI, PCI, CABG, or stroke; <sup>c</sup>ACE inhibitors/ARB, beta blockers, diuretics and/or calcium channel blockers; <sup>d</sup>statins and/or ezetimibe. ACEi, angiotensin converting enzyme inhibitor; ARB, angiotensin receptor blocker; ASCVD, atherosclerotic cardiovascular disease (MI, PCI, CABG or stroke); BMI, body mass index; CABG, coronary artery bypass grafting; MI, myocardial infarction; N, number; PCI, percutaneous coronary intervention.

**Fig. 2.** Proportion of patients achieving targets for BP and LDL-C at the one-year follow-up visit 2006-2019. The p-value for trend from 2006 to 2019 was  $<0.0001$  for both BP and LDL-C. BP, blood pressure; LDL-C, low-density lipoprotein cholesterol.

**Fig. 3.** Mean delta values between hospitalization and the one-year CR follow-up visit for systolic and diastolic BP (upper panel) and LDL-C (lower panel) by year 2006-2019. The p-value for the trend from 2006 to 2019 was  $<0.0001$  for all. DBP, diastolic blood pressure; LDL-C, low-density lipoprotein cholesterol; SBP, systolic blood pressure.

**Fig. 4.** Prevalence of persistent smoking (proportion of active smokers at the time of MI who were still smoking), inadequate physical activity, overweight/obesity, and diabetes at one-year post-MI. <sup>a</sup>BMI  $\geq 25$  kg/m<sup>2</sup>; <sup>b</sup>waist circumference  $\geq 102$  cm for men and  $\geq 88$  cm for women; <sup>c</sup>physically active  $\geq 30$  minutes for less than 5 days a week. BMI, body mass index; MI, myocardial infarction.

**Fig. 5.** Proportion of patients at one-year follow-up for each year 2006-2019 treated with statins, ezetimibe, ACEi or ARB, beta blockers, antiplatelet (acetylsalicylic acid or P2Y<sub>12</sub>-receptor

antagonists) or anticoagulant therapy (warfarin or direct oral anticoagulants). ACEi, angiotensin converting enzyme inhibitor; ARB, angiotensin receptor blocker.

**Fig. 6.** Management of BP and LDL in SWEDEHEART (left panel) and EUROASPIRE (right panel) (5, 6). \*Different definitions of BP treatment goals for patients with diabetes were adapted in the EUROASPIRE surveys (III <130/80 mmHg, IV 140/80 mmHg, V <140/85 mmHg), while the definition <140/90 mmHg was adapted for patients with and without diabetes in SWEDEHEART. BP, blood pressure; LDL-C, low-density lipoprotein cholesterol.

## References

1. Björck L, Rosengren A, Bennett K, Lappas G, Capewell S. Modelling the decreasing coronary heart disease mortality in Sweden between 1986 and 2002. *Eur Heart J.* 2009;30(9):1046-56.
2. Salzwedel A, Jensen K, Rauch B, et al. Effectiveness of comprehensive cardiac rehabilitation in coronary artery disease patients treated according to contemporary evidence based medicine: Update of the Cardiac Rehabilitation Outcome Study (CROS-II). *Eur J Prev Cardiol.* 2020;27(16):1756-74.
3. Visseren FLJ, Mach F, Smulders YM, et al. 2021 ESC Guidelines on cardiovascular disease prevention in clinical practice. *Eur Heart J.* 2021;42(34):3227-337.
4. Ambrosetti M, Abreu A, Corra U, et al. Secondary prevention through comprehensive cardiovascular rehabilitation: From knowledge to implementation. 2020 update. A position paper from the Secondary Prevention and Rehabilitation Section of the European Association of Preventive Cardiology. *Eur J Prev Cardiol.* 2020:2047487320913379.
5. Kotseva K, De Backer G, De Bacquer D, et al. Lifestyle and impact on cardiovascular risk factor control in coronary patients across 27 countries: Results from the

1  
2  
3 European Society of Cardiology ESC-EORP EUROASPIRE V registry. *Eur J Prev Cardiol.*  
4  
5 2019;26(8):824-35.  
6

7 6. Kotseva K, De Bacquer D, Jennings C, et al. Time Trends in Lifestyle, Risk Factor  
8 Control, and Use of Evidence-Based Medications in Patients With Coronary Heart Disease in  
9 Europe: Results From 3 EUROASPIRE Surveys, 1999-2013. *Glob Heart.* 2017;12(4):315-22  
10  
11  
12  
13  
14  
15 e3.

16 7. Poffley A, Thomas E, Grace SL, et al. A systematic review of cardiac  
17 rehabilitation registries. *Eur J Prev Cardiol.* 2017;24(15):1596-609.  
18  
19

20 8. Aktaa S, Batra G, Wallentin L, et al. European Society of Cardiology  
21 methodology for the development of quality indicators for the quantification of cardiovascular  
22 care and outcomes. *Eur Heart J Qual Care Clin Outcomes.* 2022;8(1):4-13.  
23  
24  
25  
26  
27

28 9. Aktaa S, Gencer B, Arbelo E, et al. European Society of Cardiology Quality  
29 Indicators for Cardiovascular Disease Prevention: developed by the Working Group for  
30 Cardiovascular Disease Prevention Quality Indicators in collaboration with the European  
31 Association for Preventive Cardiology of the European Society of Cardiology. *Eur J Prev*  
32  
33  
34  
35  
36  
37  
38  
39  
40  
41  
42  
43  
44  
45  
46  
47  
48  
49  
50  
51  
52  
53  
54  
55  
56  
57  
58  
59  
60  
*Cardiol.* 2022;29(7):1060-71.

10. Thomas RJ, Balady G, Banka G, et al. 2018 ACC/AHA Clinical Performance and  
Quality Measures for Cardiac Rehabilitation: A Report of the American College of  
Cardiology/American Heart Association Task Force on Performance Measures. *J Am Coll*  
*Cardiol.* 2018;71(16):1814-37.

11. British Association for Cardiovascular Prevention and Rehabilitation. The  
BACPR standards and core components for cardiovascular disease prevention and  
rehabilitation (3rd edition). London, England; 2017.



- 1  
2  
3 12. Jernberg T, Attebring MF, Hambraeus K, et al. The Swedish Web-system for  
4 enhancement and development of evidence-based care in heart disease evaluated according to  
5 recommended therapies (SWEDEHEART). *Heart*. 2010;96(20):1617-21.  
6  
7  
8  
9  
10 13. Back M, Leosdottir M, Hagstrom E, et al. The SWEDEHEART secondary  
11 prevention and cardiac rehabilitation registry (SWEDEHEART CR registry). *Eur Heart J*  
12 *Qual Care Clin Outcomes*. 2021;7(5):431-7.  
13  
14  
15  
16 14. Hambraeus K, Tyden P, Lindahl B. Time trends and gender differences in  
17 prevention guideline adherence and outcome after myocardial infarction: Data from the  
18 SWEDEHEART registry. *Eur J Prev Cardiol*. 2016;23(4):340-8.  
19  
20  
21  
22  
23 15. Jernberg T, Boberg B, Back M, et al. SWEDEHEART Annual Report 2019.  
24 Uppsala, Sweden: Uppsala Clinical Research Center; 2019.  
25  
26  
27 16. Vasko P, Alfredsson J, Back M, et al. SWEDEHEART Annual report 2020.  
28 Annual report. Uppsala, Sweden: Uppsala Clinical Research Center (UCR); 2021.  
29  
30  
31  
32 17. Friedewald WT, Levy RI, Fredrickson DS. Estimation of the concentration of  
33 low-density lipoprotein cholesterol in plasma, without use of the preparative ultracentrifuge.  
34 *Clin Chem*. 1972;18(6):499-502.  
35  
36  
37  
38 18. Kotseva K, Wood D, De Backer G, et al. Use and effects of cardiac rehabilitation  
39 in patients with coronary heart disease: results from the EUROASPIRE III survey. *Eur J Prev*  
40 *Cardiol*. 2013;20(5):817-26.  
41  
42  
43  
44 19. Kotseva K, Wood D, De Bacquer D, et al. Determinants of participation and risk  
45 factor control according to attendance in cardiac rehabilitation programmes in coronary patients  
46 in Europe: EUROASPIRE IV survey. *Eur J Prev Cardiol*. 2018;25(12):1242-51.  
47  
48  
49  
50 20. De Bacquer D, Astin F, Kotseva K, et al. Poor adherence to lifestyle  
51 recommendations in patients with coronary heart disease: results from the EUROASPIRE  
52 surveys. *Eur J Prev Cardiol*. 2021.  
53  
54  
55  
56  
57  
58  
59  
60

- 1  
2  
3 21. Reich B, Benzer W, Harpf H, et al. Efficacy of extended, comprehensive  
4 outpatient cardiac rehabilitation on cardiovascular risk factors: A nationwide registry. *Eur J*  
5  
6 *Prev Cardiol.* 2020;27(10):1026-33.  
7  
8
- 9  
10 22. Zwisler AD, Rossau HK, Nakano A, et al. The Danish Cardiac Rehabilitation  
11  
12 Database. *Clin Epidemiol.* 2016;8:451-6.  
13
- 14 23. Thomsen KK. Danish Cardiac Rehabilitation Registry Annual Report. 2019.  
15
- 16 24. Paton JY, Ranmal R, Dudley J, and R. C. S. Committee. Clinical audit: still an  
17  
18 important tool for improving healthcare. *Arch Dis Child Educ Pract Ed.* 2015;100(2):83-8.  
19
- 20 25. Abreu A, Frederix I, Dendale P, et al. Standardization and quality improvement  
21  
22 of secondary prevention through cardiovascular rehabilitation programmes in Europe: The  
23  
24 avenue towards EAPC accreditation programme: A position statement of the Secondary  
25  
26 Prevention and Rehabilitation Section of the European Association of Preventive Cardiology  
27  
28 (EAPC). *Eur J Prev Cardiol.* 2020.  
29
- 30 26. Feldman AL, Griffin SJ, Pharm E, et al. Screening for type 2 diabetes: do screen-  
31  
32 detected cases fare better? *Diabetologia.* 2017;60(11):2200-9.  
33
- 34 27. Ogmundsdottir Michelsen H, Sjolín I, Schlyter M, et al. Cardiac rehabilitation  
35  
36 after acute myocardial infarction in Sweden - evaluation of programme characteristics and  
37  
38 adherence to European guidelines: The Perfect Cardiac Rehabilitation (Perfect-CR) study. *Eur*  
39  
40 *J Prev Cardiol.* 2020;27(1):18-27.  
41  
42
- 43 28. Kotseva K, Wood D, De Backer G, et al. EUROASPIRE III: a survey on the  
44  
45 lifestyle, risk factors and use of cardioprotective drug therapies in coronary patients from 22  
46  
47 European countries. *Eur J Cardiovasc Prev Rehabil.* 2009;16(2):121-37.  
48
- 49 29. Doherty P. National Audit of Cardiac Rehabilitation - Annual Statistical Reports  
50  
51  
52  
53  
54  
55  
56  
57  
58  
59  
60 York, U.K.; 2016-2019.

- 1  
2  
3 30. Critchley JA, Capewell S. Mortality risk reduction associated with smoking  
4 cessation in patients with coronary heart disease: a systematic review. *JAMA*. 2003;290(1):86-  
5  
6  
7 97.  
8  
9  
10 31. Kotseva K, Wood D, De Bacquer D, et al. EUROASPIRE IV: A European Society  
11 of Cardiology survey on the lifestyle, risk factor and therapeutic management of coronary  
12  
13 patients from 24 European countries. *Eur J Prev Cardiol*. 2016;23(6):636-48.  
14  
15  
16  
17  
18  
19  
20  
21  
22  
23  
24  
25  
26  
27  
28  
29  
30  
31  
32  
33  
34  
35  
36  
37  
38  
39  
40  
41  
42  
43  
44  
45  
46  
47  
48  
49  
50  
51  
52  
53  
54  
55  
56  
57  
58  
59  
60

For peer review only

|   |      |      |      |      |      |      |      |      |      |      |      |      |      |      |
|---|------|------|------|------|------|------|------|------|------|------|------|------|------|------|
| N | 2502 | 3942 | 5223 | 4948 | 4720 | 5368 | 5976 | 6530 | 6432 | 6831 | 7121 | 7073 | 7269 | 7428 |
|---|------|------|------|------|------|------|------|------|------|------|------|------|------|------|

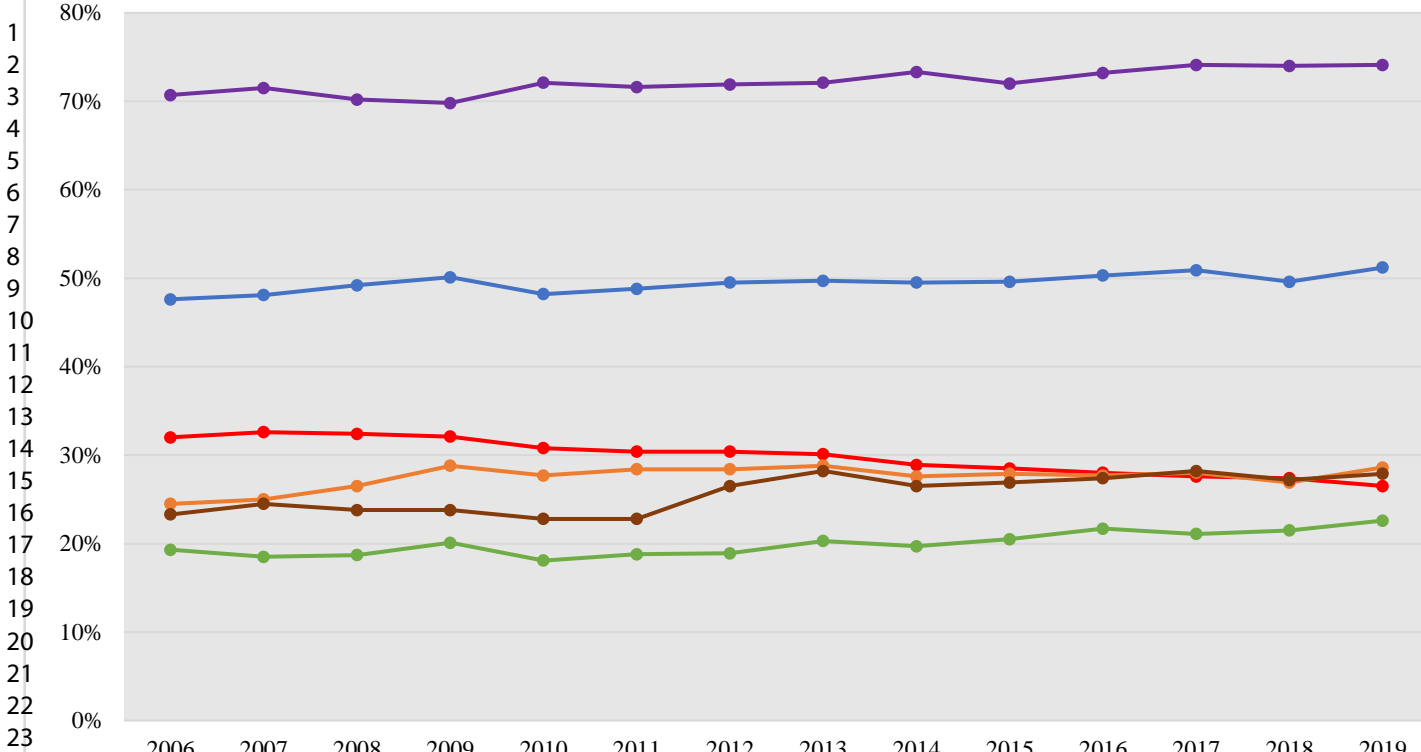

● Overweight and obesity<sup>a</sup>
● Use of antihypertensive drugs<sup>c</sup>  
● Smoking
 ● Use of lipid lowering drugs<sup>d</sup>  
● Prior ASCVD<sup>b</sup>
● Diabetes

1  
2  
3  
4  
5  
6  
7  
8  
9  
10  
11  
12  
13  
14  
15  
16  
17  
18  
19  
20  
21  
22  
23  
24  
25

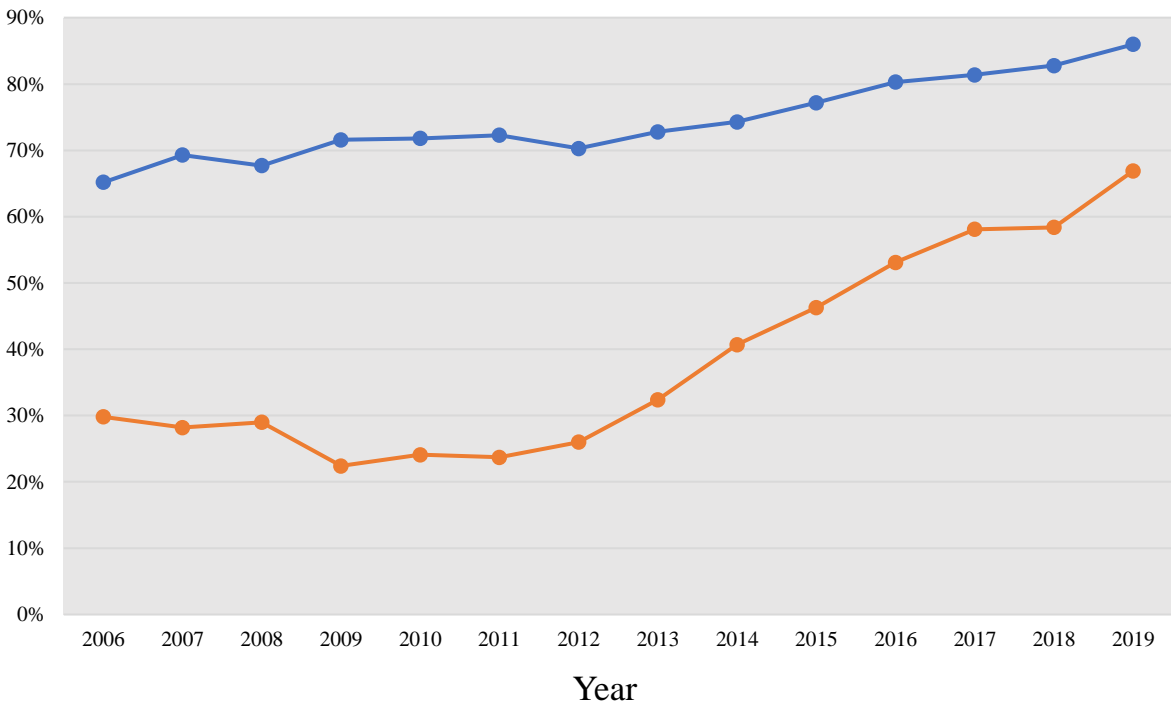

For peer review only - <http://bmjopen.bmj.com/site/about/guidelines.xhtml>

● BP <140/90 mmHg ● LDL-C <1.8 mmol/L

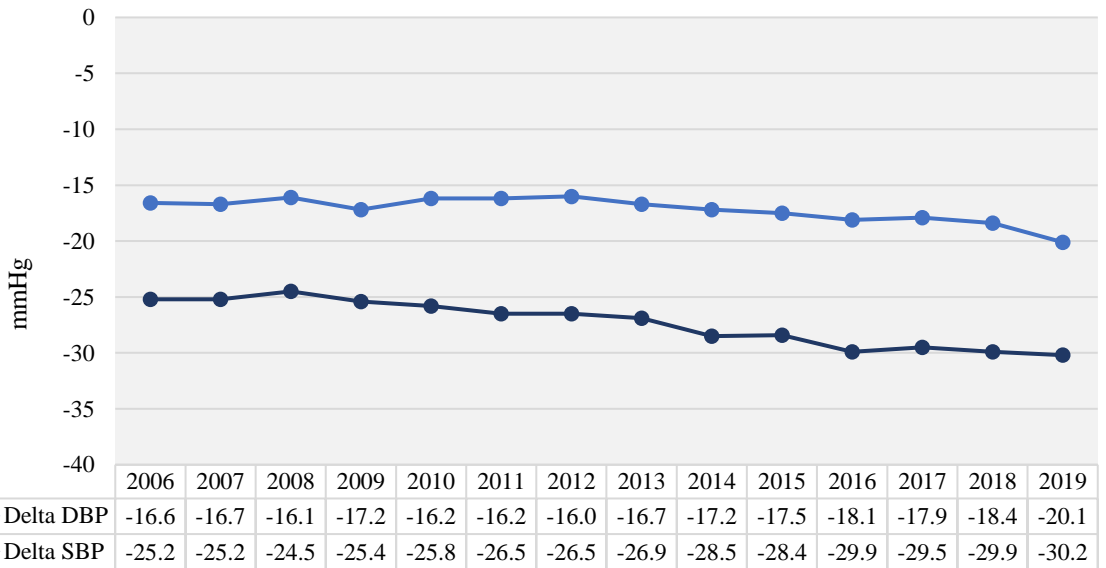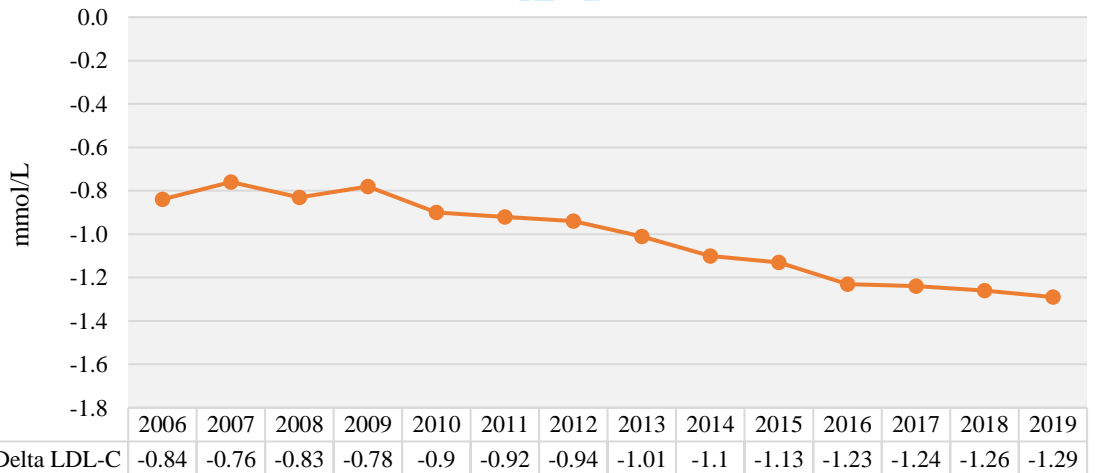

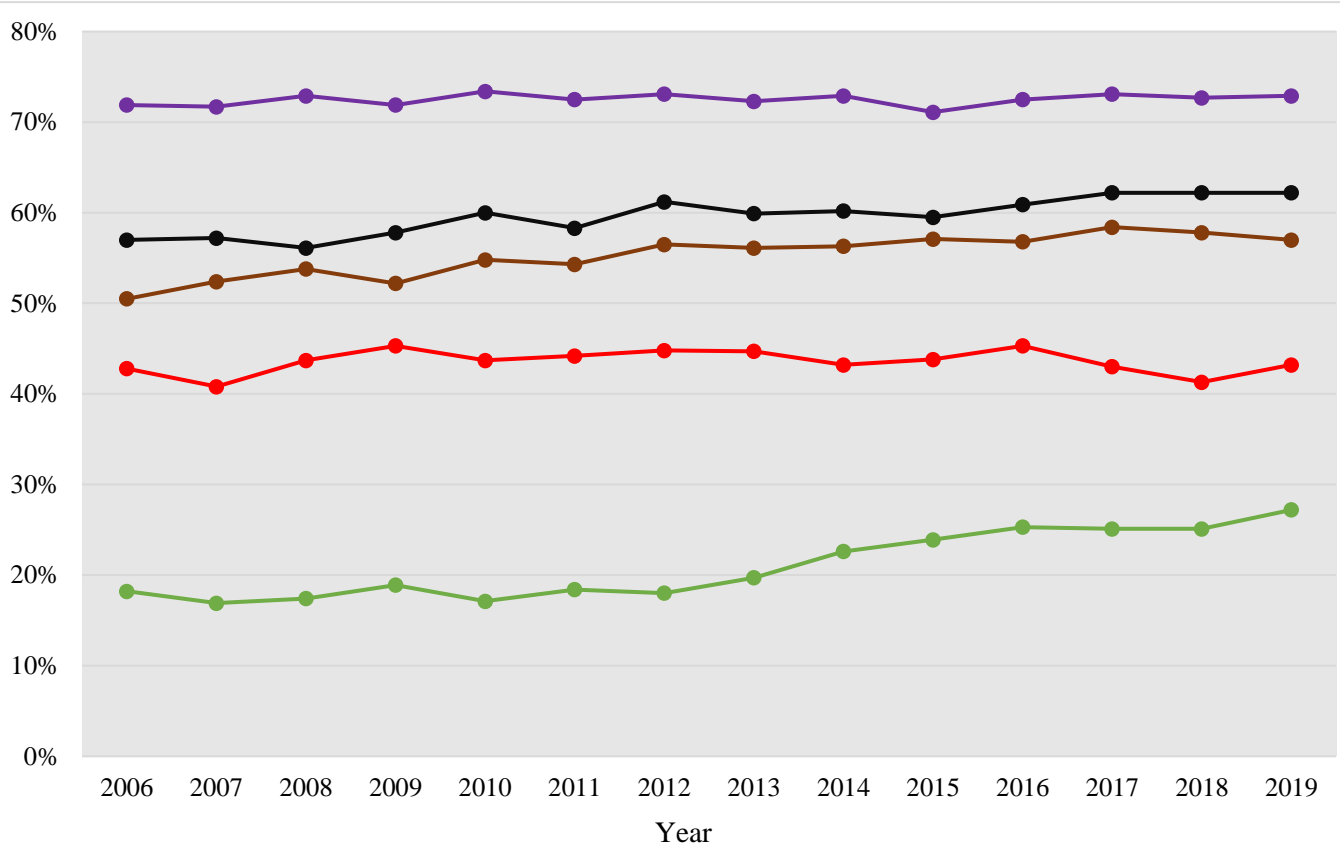

Overweight and obesity<sup>a</sup>      Central obesity<sup>b</sup>  
Persistent smoking      Inadequate physical activity<sup>c</sup>  
Diabetes

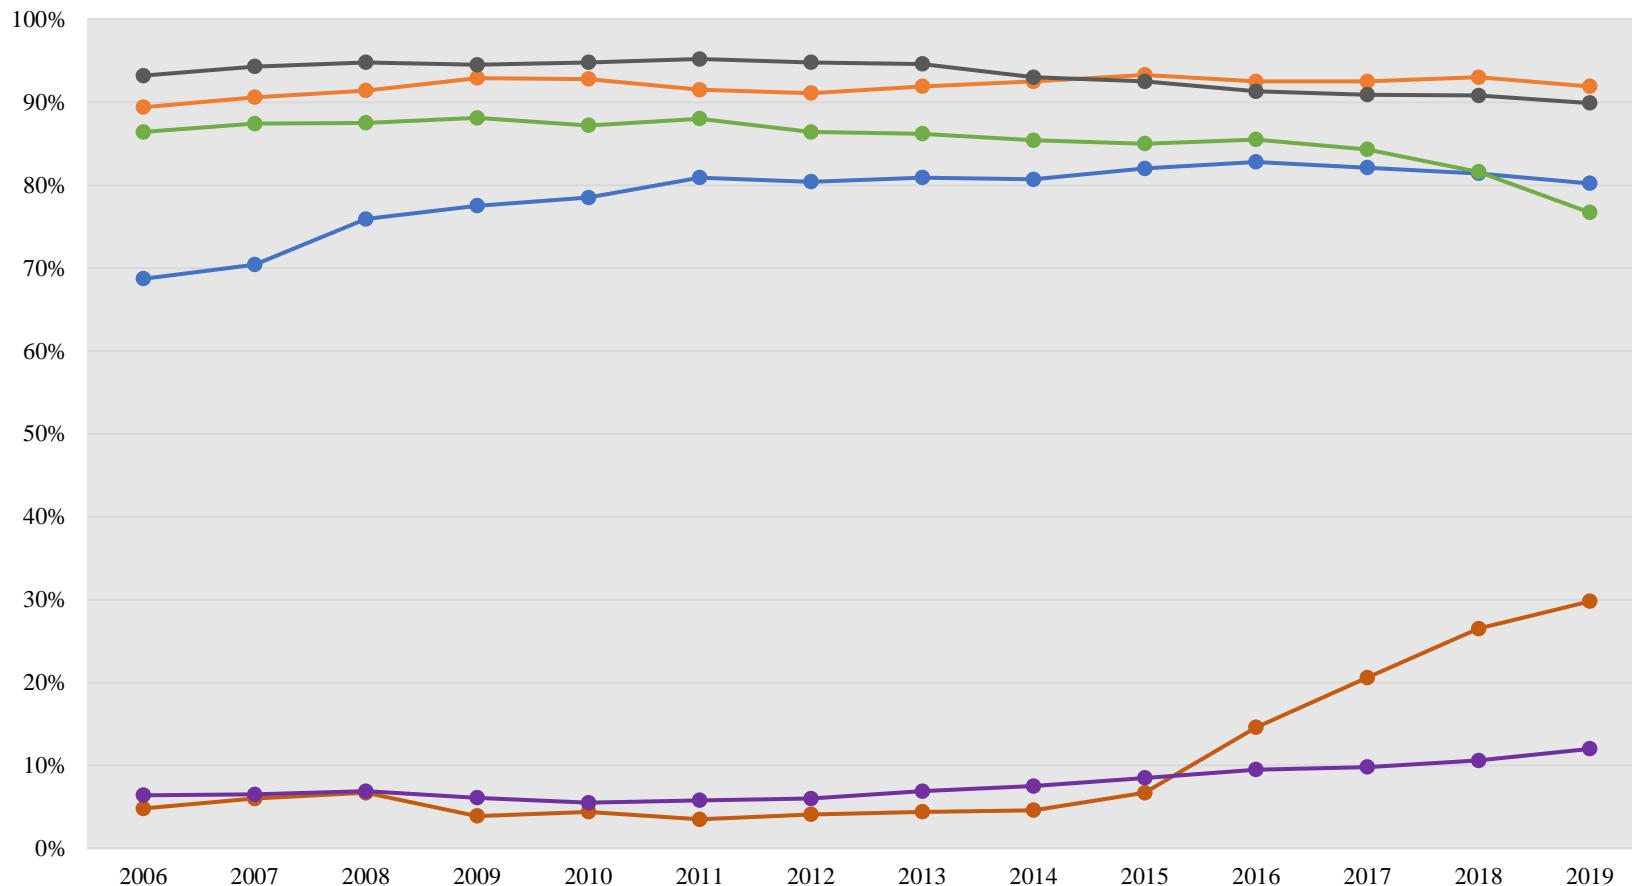

—●— Statin
 —●— Ezetimibe  
—●— ACE/ARB
 —●— Beta blockers  
—●— Antiplatelet therapy
 —●— Anticoagulant therapy



1  
2  
3  
4  
5  
6  
7  
8  
9  
10  
11  
12  
13  
14  
15  
16  
17  
18  
19  
20

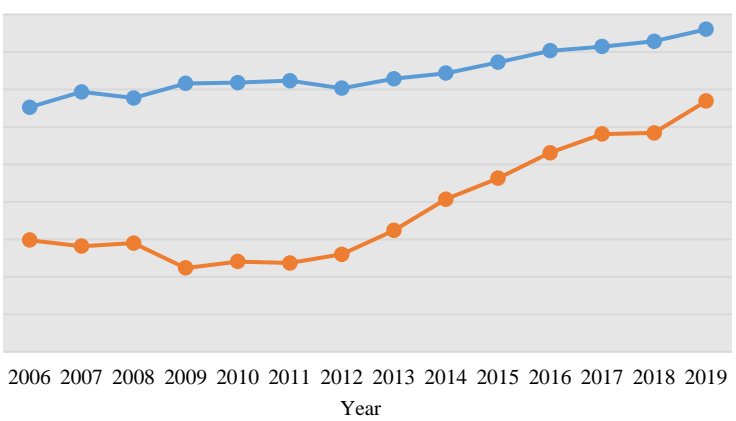

### SWEDHEART

For peer review only - <http://bmjopen.bmj.com/site/about/guidelines.xhtml>

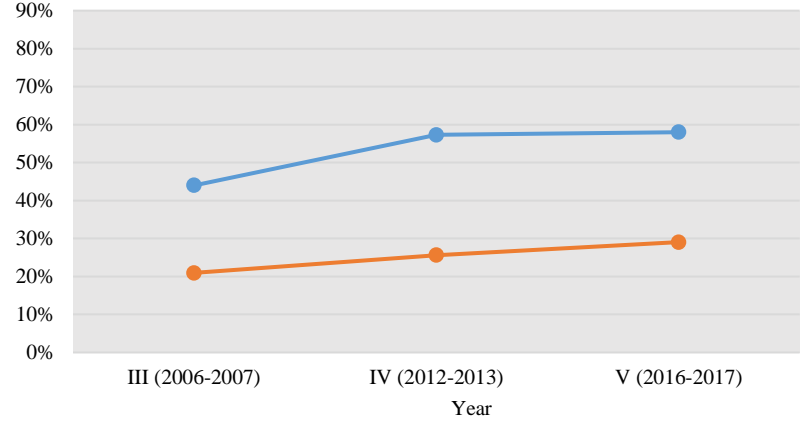

### EUROASPIRE

## Supplementary material

Temporal trends in cardiovascular risk factors, lifestyle, and secondary preventive medication  
for patients with myocardial infarction attending cardiac rehabilitation in Sweden 2006-2019:  
a registry-based cohort study

**Table S1.** Patient characteristics during hospitalization (continuous variables) by year. Data are presented as median values (q1, q3).

1

| Year                       | 2006           | 2007           | 2008           | 2009           | 2010           | 2011           | 2012           | 2013           | 2014           | 2015           | 2016           | 2017           | 2018           | 2019           | p for trend |
|----------------------------|----------------|----------------|----------------|----------------|----------------|----------------|----------------|----------------|----------------|----------------|----------------|----------------|----------------|----------------|-------------|
| N                          | 2502           | 3942           | 5223           | 4948           | 4720           | 5368           | 5976           | 6530           | 6432           | 6831           | 7121           | 7073           | 7269           | 7428           |             |
| Age (years)                | 63 (57, 69)    | 63 (57, 69)    | 63 (57, 69)    | 63 (57, 69)    | 63 (57, 69)    | 64 (57, 69)    | 64 (57, 69)    | 64 (57, 69)    | 64 (57, 69)    | 64 (57, 69)    | 65 (57, 70)    | 64 (57, 70)    | 65 (58, 70)    | 65 (58, 70)    | <0.0001     |
| N missing                  | 0              | 0              | 0              | 0              | 0              | 0              | 0              | 0              | 0              | 0              | 0              | 0              | 0              | 0              |             |
| Systolic BP (mmHg)         | 150 (130, 170) | 147 (130, 165) | 145 (130, 165) | 146 (130, 165) | 147 (130, 165) | 149 (130, 168) | 150 (130, 170) | 150 (130, 170) | 150 (131, 170) | 150 (132, 170) | 150 (133, 170) | 150 (132, 170) | 150 (133, 170) | 150 (130, 169) | <0.0001     |
| N missing                  | 293            | 406            | 479            | 456            | 308            | 7              | 18             | 36             | 48             | 51             | 44             | 2              | 3              | 4              |             |
| Diastolic BP (mmHg)        | 85 (74, 100)   | 85 (75, 98)    | 85 (75, 97)    | 85 (75, 97)    | 85 (75, 96)    | 85 (75, 98)    | 87 (76, 100)   | 88 (77, 100)   | 88 (78, 100)   | 89 (79, 100)   | 89 (78, 99)    | 89 (79, 100)   | 90 (79, 100)   | 89 (79, 100)   | <0.0001     |
| N missing                  | 330            | 471            | 529            | 509            | 410            | 130            | 176            | 213            | 290            | 299            | 261            | 227            | 352            | 454            |             |
| Total cholesterol (mmol/L) | 5.0 (4.3, 5.8) | 5.0 (4.2, 5.8) | 4.9 (4.2, 5.7) | 5.0 (4.2, 5.8) | 5.1 (4.3, 5.9) | 5.1 (4.3, 6.0) | 5.1 (4.3, 6.0) | 5.1 (4.3, 6.0) | 5.0 (4.2, 5.9) | 5.0 (4.2, 5.8) | 5.0 (4.2, 5.9) | 5.0 (4.1, 5.8) | 5.0 (4.1, 5.9) | 4.9 (4.0, 5.7) | <0.0001     |
| N missing                  | 329            | 554            | 788            | 833            | 835            | 1108           | 1185           | 1280           | 1204           | 1088           | 947            | 835            | 686            | 727            |             |
| LDL-C (mmol/L)             | 3.0 (2.3, 3.7) | 3.0 (2.3, 3.7) | 3.0 (2.3, 3.7) | 3.1 (2.3, 3.8) | 3.2 (2.5, 3.9) | 3.2 (2.5, 3.9) | 3.2 (2.5, 4.0) | 3.2 (2.4, 3.9) | 3.1 (2.3, 3.9) | 3.1 (2.3, 3.8) | 3.1 (2.3, 3.9) | 3.0 (2.2, 3.8) | 3.0 (2.2, 3.8) | 3.0 (2.2, 3.8) | <0.0001     |
| N missing                  | 471            | 844            | 1008           | 972            | 1001           | 1272           | 1420           | 1678           | 1395           | 1234           | 1028           | 927            | 629            | 663            |             |
| HDL-C (mmol/L)             | 1.2 (1.0, 1.4) | 1.2 (1.0, 1.4) | 1.1 (0.9, 1.4) | 1.1 (0.9, 1.3) | 1.1 (0.9, 1.3) | 1.1 (0.9, 1.4) | 1.1 (0.9, 1.4) | 1.1 (1.0, 1.4) | 1.1 (1.0, 1.4) | 1.1 (0.9, 1.4) | 1.1 (0.9, 1.4) | 1.2 (1.0, 1.4) | 1.2 (0.9, 1.4) | 1.1 (0.9, 1.4) | 0.003       |
| N missing                  | 455            | 821            | 898            | 886            | 941            | 1214           | 1330           | 1519           | 1374           | 1188           | 987            | 901            | 746            | 766            |             |

| Year                     | 2006              | 2007              | 2008              | 2009              | 2010              | 2011              | 2012              | 2013              | 2014              | 2015              | 2016              | 2017              | 2018              | 2019              | p for trend |
|--------------------------|-------------------|-------------------|-------------------|-------------------|-------------------|-------------------|-------------------|-------------------|-------------------|-------------------|-------------------|-------------------|-------------------|-------------------|-------------|
| N                        | 2502              | 3942              | 5223              | 4948              | 4720              | 5368              | 5976              | 6530              | 6432              | 6831              | 7121              | 7073              | 7269              | 7428              |             |
| Triglycerides (mmol/L)   | 1.5 (1.1, 2.2)    | 1.5 (1.1, 2.1)    | 1.5 (1.1, 2.1)    | 1.5 (1.1, 2.1)    | 1.4 (1.1, 2.0)    | 1.4 (1.0, 2.0)    | 1.4 (1.0, 1.9)    | 1.4 (1.0, 1.9)    | 1.4 (1.0, 2.0)    | 1.4 (1.0, 2.0)    | 1.4 (1.0, 2.0)    | 1.4 (1.0, 2.0)    | 1.4 (1.0, 2.0)    | 1.4 (1.0, 2.0)    | <0.0001     |
| N missing                | 391               | 769               | 897               | 901               | 923               | 1170              | 1318              | 1599              | 1500              | 1601              | 1488              | 1460              | 1481              | 1472              |             |
| F-glucose (mmol/L)       | 6.7 (5.6, 8.4)    | 6.6 (5.7, 8.3)    | 6.7 (5.7, 8.4)    | 6.8 (5.7, 8.5)    | 6.7 (5.8, 8.3)    | 6.8 (5.8, 8.5)    | 6.7 (5.8, 8.4)    | 6.7 (5.9, 8.5)    | 6.8 (5.9, 8.5)    | 6.8 (5.9, 8.6)    | 6.9 (5.9, 8.7)    | 6.9 (5.9, 8.7)    | 6.9 (5.9, 8.6)    | 7.0 (6.0, 8.8)    | <0.0001     |
| N missing                | 213               | 332               | 452               | 363               | 324               | 727               | 1034              | 1147              | 1014              | 767               | 762               | 643               | 812               | 1011              |             |
| HbA1c (mmol/mol)*        | N/A               | N/A               | N/A               | N/A               | N/A               | 59.0 (50.0, 71.0) | 59.0 (48.0, 73.0) | 58.0 (50.0, 73.0) | 61.0 (50.0, 74.0) | 60.0 (50.0, 77.0) | 59.0 (48.0, 74.0) | 56.0 (48.0, 69.0) | 56.0 (48.0, 72.0) | 57.0 (48.0, 69.0) | 0.012       |
| N missing                | 484               | 730               | 977               | 996               | 852               | 776               | 872               | 1059              | 949               | 1071              | 1113              | 980               | 973               | 1012              |             |
| BMI (kg/m <sup>2</sup> ) | 26.7 (24.6, 29.4) | 26.9 (24.7, 29.7) | 26.9 (24.5, 29.7) | 26.9 (24.5, 29.8) | 27.0 (24.7, 29.9) | 27.1 (24.7, 30.0) | 27.2 (24.7, 30.1) | 27.2 (24.7, 30.1) | 27.2 (24.8, 30.1) | 27.2 (24.7, 30.1) | 27.4 (24.8, 30.5) | 27.4 (24.9, 30.4) | 27.5 (24.9, 30.5) | 27.5 (24.9, 30.7) | <0.0001     |
| N missing                | 793               | 955               | 898               | 861               | 862               | 316               | 263               | 167               | 183               | 166               | 205               | 169               | 207               | 234               |             |

\*Patients with diabetes only. BMI, body mass index; BP, blood pressure; F, fasting; HbA1c, hemoglobin A1c; HDL-C, high-density lipoprotein cholesterol; LDL-C, low-density lipoprotein cholesterol; N, number; N/A, no data available; q1, lower quartile; q3, upper quartile.

**Table S2.** Patient characteristics during hospitalization (categorical variables) by year. Data are presented as numbers (N) and proportions (%). <sup>3</sup>

| Year                                                | 2006  | 2007  | 2008  | 2009  | 2010  | 2011  | 2012  | 2013  | 2014  | 2015  | 2016  | 2017  | 2018  | 2019  | p for trend |
|-----------------------------------------------------|-------|-------|-------|-------|-------|-------|-------|-------|-------|-------|-------|-------|-------|-------|-------------|
| N                                                   | 2502  | 3942  | 5223  | 4948  | 4720  | 5368  | 5976  | 6530  | 6432  | 6831  | 7121  | 7073  | 7269  | 7428  |             |
| Male sex                                            | 73.5% | 74.4% | 73.1% | 73.7% | 74.1% | 74.5% | 74.6% | 74.1% | 76.2% | 75.3% | 74.5% | 76.2% | 75.1% | 75.2% | <0.0001     |
| N missing                                           | 0     | 0     | 0     | 0     | 0     | 0     | 0     | 0     | 0     | 0     | 0     | 0     | 0     | 0     |             |
| Current smoking                                     | 32.0% | 32.6% | 32.4% | 32.1% | 30.8% | 30.4% | 30.4% | 30.1% | 28.9% | 28.5% | 28.0% | 27.6% | 27.4% | 26.5% | <0.0001     |
| N missing                                           | 99    | 150   | 161   | 171   | 130   | 215   | 128   | 143   | 124   | 132   | 145   | 145   | 172   | 177   |             |
| Overweight/obese (BMI $\geq$ 25 kg/m <sup>2</sup> ) | 70.7% | 71.5% | 70.2% | 69.8% | 72.1% | 71.6% | 71.9% | 72.1% | 73.3% | 72.0% | 73.2% | 74.1% | 74.0% | 74.1% | <0.0001     |
| N missing                                           | 793   | 955   | 898   | 861   | 862   | 316   | 263   | 167   | 183   | 166   | 205   | 169   | 207   | 234   |             |
| Obese (BMI $\geq$ 30 kg/m <sup>2</sup> )            | 22.8% | 23.8% | 23.4% | 23.9% | 24.3% | 25.4% | 26.0% | 25.9% | 26.0% | 26.4% | 28.7% | 27.9% | 29.0% | 29.5% | <0.0001     |
| N missing                                           | 793   | 955   | 898   | 861   | 862   | 316   | 263   | 167   | 183   | 166   | 205   | 169   | 207   | 234   |             |
| Use of antihypertensive drugs*                      | 47.5% | 47.9% | 49.1% | 49.9% | 48.0% | 48.4% | 49.2% | 49.4% | 49.2% | 49.4% | 49.8% | 50.3% | 48.9% | 50.5% | <0.0001     |
| N missing                                           | 6     | 13    | 9     | 24    | 15    | 41    | 26    | 33    | 31    | 23    | 84    | 85    | 92    | 99    |             |
| Use of lipid lowering drugs†                        | 24.5% | 25.0% | 26.5% | 28.8% | 27.7% | 28.4% | 28.4% | 28.8% | 27.6% | 27.9% | 27.7% | 28.0% | 26.9% | 28.6% | 0.004       |
| N missing                                           | 8     | 17    | 15    | 30    | 20    | 44    | 29    | 39    | 29    | 31    | 94    | 103   | 102   | 131   |             |
| Prior diabetes diagnosis                            | 19.3% | 18.5% | 18.7% | 20.1% | 18.1% | 18.8% | 18.9% | 20.3% | 19.7% | 20.5% | 21.7% | 21.1% | 21.5% | 22.6% | <0.0001     |
| N missing                                           | 0     | 0     | 1     | 0     | 0     | 2     | 0     | 1     | 0     | 6     | 1     | 2     | 13    | 21    |             |
| Prior ASCVD diagnosis‡                              | 23.3% | 24.5% | 23.8% | 23.8% | 22.8% | 22.8% | 26.5% | 28.2% | 26.5% | 26.9% | 27.4% | 28.2% | 27.2% | 27.9% | <0.0001     |
| N missing                                           | 0     | 0     | 0     | 0     | 0     | 2     | 0     | 0     | 0     | 0     | 0     | 0     | 0     | 0     |             |

\*ACE inhibitor, ARB, beta blocker, diuretics, and/or calcium channel blocker. †Statins and/or ezetimibe. ‡MI, PCI, CABG or stroke. ACE, angiotensin converting enzyme; ARB, angiotensin receptor blocker; ASCVD, atherosclerotic cardiovascular disease; BMI, body mass index;

1  
2  
3 CABG, coronary artery bypass grafting; eGFR, estimated glomerular filtration rate; MI, myocardial infarction; PCI, percutaneous coronary  
4 intervention.  
5  
6  
7  
8  
9  
10  
11  
12  
13  
14  
15  
16  
17  
18  
19  
20  
21  
22  
23  
24  
25  
26  
27  
28  
29  
30  
31  
32  
33  
34  
35  
36  
37  
38  
39  
40  
41  
42  
43  
44  
45  
46

For peer review only

**Table S3.** Type of MI, revascularization during hospitalization, and pharmacological treatment at discharge by year. Data are presented as numbers (N) and proportions (%).

| Year                                   | 2006  | 2007  | 2008  | 2009  | 2010  | 2011  | 2012  | 2013  | 2014  | 2015  | 2016  | 2017  | 2018  | 2019  | p for trend |
|----------------------------------------|-------|-------|-------|-------|-------|-------|-------|-------|-------|-------|-------|-------|-------|-------|-------------|
| N                                      | 2502  | 3942  | 5223  | 4948  | 4720  | 5368  | 5976  | 6530  | 6432  | 6831  | 7121  | 7073  | 7269  | 7428  |             |
| STEMI                                  | 39.3% | 38.8% | 36.4% | 38.9% | 39.7% | 39.2% | 37.6% | 37.2% | 38.9% | 38.9% | 38.6% | 38.9% | 40.4% | 40.5% | <0.0001     |
| N missing                              | 0     | 1     | 2     | 69    | 52    | 48    | 55    | 5     | 0     | 0     | 0     | 0     | 0     | 0     |             |
| Revascularized* during hospitalization | 65.1% | 71.5% | 71.1% | 71.1% | 76.4% | 87.3% | 82.2% | 83.9% | 86.0% | 88.6% | 88.5% | 89.6% | 90.6% | 90.3% | <0.0001     |
| N missing                              | 0     | 0     | 0     | 0     | 0     | 0     | 0     | 0     | 0     | 0     | 0     | 0     | 0     | 0     |             |
| <b>Discharge medication</b>            |       |       |       |       |       |       |       |       |       |       |       |       |       |       |             |
| Statin                                 | 90.4% | 93.5% | 94.7% | 95.7% | 96.7% | 96.8% | 97.1% | 96.8% | 97.3% | 97.7% | 97.5% | 97.3% | 96.9% | 97.0% | <0.0001     |
| N missing                              | 1     | 2     | 4     | 1     | 1     | 2     | 1     | 4     | 5     | 2     | 0     | 2     | 2     | 8     |             |
| Ezetimibe                              | 1.3%  | 1.5%  | 2.0%  | 2.0%  | 1.5%  | 1.6%  | 1.5%  | 1.5%  | 1.6%  | 1.5%  | 2.4%  | 3.1%  | 4.2%  | 5.1%  | <0.0001     |
| N missing                              | 3     | 7     | 16    | 7     | 4     | 4     | 3     | 8     | 7     | 2     | 1     | 0     | 798   | 4     |             |
| ACE-inhibitor/ARB                      | 64.3% | 67.1% | 72.4% | 75.6% | 78.9% | 82.5% | 82.8% | 84.0% | 83.9% | 85.1% | 85.1% | 85.8% | 85.3% | 84.7% | <0.0001     |
| N missing                              | 3     | 6     | 6     | 2     | 3     | 9     | 3     | 5     | 6     | 3     | 3     | 1     | 2     | 4     |             |
| Beta blocker                           | 92.2% | 90.6% | 92.3% | 93.1% | 92.8% | 93.2% | 92.1% | 91.9% | 90.9% | 90.2% | 90.3% | 89.7% | 88.2% | 81.5% | <0.0001     |
| N missing                              | 2     | 3     | 7     | 0     | 0     | 3     | 2     | 0     | 3     | 2     | 1     | 1     | 2     | 4     |             |
| Acetylsalicylic acid                   | 94.0% | 96.2% | 95.9% | 96.2% | 96.6% | 96.9% | 97.6% | 97.2% | 96.3% | 96.2% | 95.9% | 96.2% | 95.9% | 95.3% | 0.114       |
| N missing                              | 1     | 1     | 3     | 0     | 0     | 2     | 2     | 1     | 4     | 1     | 9     | 3     | 5     | 5     |             |
| P2Y <sub>12</sub> -receptor antagonist | 79.3% | 84.0% | 84.5% | 86.0% | 89.2% | 87.4% | 82.8% | 85.3% | 89.9% | 90.5% | 91.2% | 90.9% | 90.7% | 91.0% | <0.0001     |
| N missing                              | 0     | 0     | 0     | 0     | 0     | 0     | 0     | 0     | 0     | 0     | 0     | 0     | 1     | 1     |             |

| Year         | 2006  | 2007  | 2008  | 2009  | 2010  | 2011  | 2012  | 2013  | 2014  | 2015  | 2016  | 2017  | 2018  | 2019  | <sup>6</sup> p for trend |
|--------------|-------|-------|-------|-------|-------|-------|-------|-------|-------|-------|-------|-------|-------|-------|--------------------------|
| N            | 2502  | 3942  | 5223  | 4948  | 4720  | 5368  | 5976  | 6530  | 6432  | 6831  | 7121  | 7073  | 7269  | 7428  |                          |
| DAPT/DAT/TAT | 78.1% | 83.9% | 84.2% | 85.8% | 88.6% | 87.5% | 83.3% | 85.3% | 89.8% | 90.7% | 91.2% | 91.2% | 91.1% | 91.5% | <0.0001                  |
| N missing    | 1     | 1     | 3     | 0     | 0     | 2     | 2     | 1     | 4     | 1     | 9     | 3     | 5     | 5     |                          |

\*Percutaneous coronary intervention or coronary artery bypass grafting. ACE, angiotensin converting enzyme; ARB, angiotensin receptor blocker; DAPT, dual antiplatelet therapy; DAT, dual antithrombotic therapy; N, number; N/A, no data available; STEMI, ST-elevation myocardial infarction; TAT, triple antithrombotic therapy.



**Table S4.** Median (q1, q3) values for selected continuous variables at the one-year follow-up visit.

| Year                       | 2006           | 2007           | 2008           | 2009           | 2010           | 2011           | 2012           | 2013           | 2014           | 2015           | 2016           | 2017           | 2018           | 2019           | p for trend |
|----------------------------|----------------|----------------|----------------|----------------|----------------|----------------|----------------|----------------|----------------|----------------|----------------|----------------|----------------|----------------|-------------|
| <b>N</b>                   | 2502           | 3942           | 5223           | 4948           | 4720           | 5368           | 5976           | 6530           | 6432           | 6831           | 7121           | 7073           | 7269           | 7428           |             |
| Systolic BP (mmHg)         | 130 (120, 145) | 130 (120, 140) | 130 (120, 140) | 130 (120, 140) | 130 (120, 140) | 130 (120, 140) | 130 (120, 140) | 130 (120, 140) | 130 (120, 140) | 130 (120, 140) | 130 (120, 138) | 130 (120, 138) | 130 (120, 137) | 128 (120, 135) | <0.0001     |
| N missing                  | 869            | 1308           | 1351           | 996            | 711            | 945            | 999            | 675            | 381            | 339            | 262            | 196            | 234            | 219            |             |
| Diastolic BP (mmHg)        | 80 (70, 82)    | 78 (70, 80)    | 80 (70, 80)    | 76 (70, 80)    | 80 (70, 80)    | 80 (70, 80)    | 80 (70, 84)    | 80 (70, 82)    | 79 (70, 82)    | 78 (70, 80)    | 77 (70, 80)    | 77 (70, 81)    | 76 (70, 81)    | 76 (70, 80)    | <0.0001     |
| N missing                  | 871            | 1314           | 1364           | 999            | 715            | 947            | 1008           | 689            | 392            | 344            | 267            | 201            | 238            | 226            |             |
| Total cholesterol (mmol/L) | 4.2 (3.6, 4.8) | 4.1 (3.6, 4.7) | 4.1 (3.6, 4.6) | 4.2 (3.7, 4.7) | 4.1 (3.6, 4.7) | 4.2 (3.6, 4.8) | 4.1 (3.6, 4.7) | 4.0 (3.5, 4.6) | 3.8 (3.3, 4.4) | 3.7 (3.2, 4.3) | 3.6 (3.2, 4.2) | 3.5 (3.1, 4.1) | 3.4 (3.0, 4.0) | 3.3 (2.9, 3.8) | <0.0001     |
| N missing                  | 690            | 1383           | 1819           | 1664           | 1117           | 1152           | 1162           | 759            | 410            | 434            | 407            | 345            | 381            | 370            |             |
| LDL-C (mmol/L)             | 2.1 (1.7, 2.6) | 2.2 (1.8, 2.6) | 2.2 (1.7, 2.6) | 2.3 (1.9, 2.7) | 2.2 (1.8, 2.7) | 2.2 (1.8, 2.7) | 2.2 (1.8, 2.7) | 2.1 (1.7, 2.5) | 1.9 (1.6, 2.4) | 1.8 (1.5, 2.3) | 1.8 (1.4, 2.2) | 1.7 (1.4, 2.1) | 1.7 (1.4, 2.1) | 1.6 (1.3, 1.9) | <0.0001     |
| N missing                  | 729            | 1443           | 1891           | 1745           | 1247           | 1238           | 1310           | 837            | 439            | 419            | 338            | 244            | 255            | 224            |             |
| HDL-C (mmol/L)             | 1.3 (1.1, 1.5) | 1.2 (1.0, 1.4) | 1.2 (1.0, 1.4) | 1.2 (1.0, 1.4) | 1.2 (1.0, 1.4) | 1.2 (1.0, 1.5) | 1.2 (1.0, 1.5) | 1.2 (1.0, 1.5) | 1.2 (1.0, 1.5) | 1.2 (1.0, 1.5) | 1.2 (1.0, 1.5) | 1.2 (1.0, 1.5) | 1.2 (1.0, 1.4) | 1.2 (1.0, 1.4) | 0.552       |
| N missing                  | 714            | 1423           | 1860           | 1720           | 1180           | 1217           | 1253           | 850            | 481            | 627            | 679            | 644            | 667            | 641            |             |
| Triglycerides (mmol/L)     | 1.4 (1.0, 1.9) | 1.3 (1.0, 1.9) | 1.3 (1.0, 1.9) | 1.4 (1.0, 1.9) | 1.3 (1.0, 1.8) | 1.3 (1.0, 1.8) | 1.3 (1.0, 1.8) | 1.3 (1.0, 1.8) | 1.2 (0.9, 1.7) | 1.2 (0.9, 1.7) | 1.2 (0.9, 1.6) | 1.2 (0.9, 1.7) | 1.2 (0.9, 1.6) | 1.1 (0.8, 1.6) | <0.0001     |
| N missing                  | 720            | 1415           | 1869           | 1701           | 1204           | 1192           | 1286           | 907            | 727            | 966            | 1153           | 1139           | 1259           | 1175           |             |

| Year                       | 2006              | 2007              | 2008              | 2009              | 2010              | 2011              | 2012              | 2013              | 2014              | 2015              | 2016              | 2017              | 2018              | 2019              | p for trend |
|----------------------------|-------------------|-------------------|-------------------|-------------------|-------------------|-------------------|-------------------|-------------------|-------------------|-------------------|-------------------|-------------------|-------------------|-------------------|-------------|
| N                          | 2502              | 3942              | 5223              | 4948              | 4720              | 5368              | 5976              | 6530              | 6432              | 6831              | 7121              | 7073              | 7269              | 7428              |             |
| F-glucose (mmol/L)         | 5.7 (5.2, 6.5)    | 5.7 (5.2, 6.4)    | 5.7 (5.2, 6.6)    | 5.7 (5.2, 6.5)    | 5.7 (5.3, 6.5)    | 5.8 (5.3, 6.6)    | 5.8 (5.3, 6.6)    | 5.9 (5.4, 6.8)    | 5.9 (5.4, 6.7)    | 6.0 (5.5, 6.7)    | 6.0 (5.5, 6.8)    | 6.0 (5.5, 6.8)    | 6.0 (5.5, 6.7)    | 6.0 (5.5, 6.8)    | <0.0001     |
| N missing                  | 893               | 1391              | 1820              | 1639              | 1374              | 1777              | 2128              | 1923              | 1953              | 2332              | 2376              | 2598              | 2830              | 3006              |             |
| HbA1c (mmol/mol)*          | 56.0 (49.0, 68.0) | 56.5 (49.0, 68.0) | 56.0 (48.0, 66.0) | 55.0 (48.0, 67.0) | 55.0 (49.0, 69.0) | 56.0 (49.0, 68.0) | 58.0 (50.0, 70.0) | 57.0 (48.0, 69.0) | 54.0 (47.0, 67.0) | 55.0 (46.0, 66.0) | 55.0 (47.0, 66.0) | 54.0 (46.0, 66.0) | 53.0 (46.0, 63.0) | 52.0 (46.0, 64.0) | <0.0001     |
| N missing                  | 165               | 215               | 242               | 274               | 267               | 372               | 407               | 496               | 595               | 676               | 735               | 755               | 801               | 868               |             |
| BMI (kg/m <sup>2</sup> )   | 26.8 (24.7, 29.7) | 27.1 (24.7, 30.0) | 27.2 (24.8, 30.1) | 27.1 (24.7, 30.0) | 27.2 (24.8, 30.2) | 27.2 (24.8, 30.2) | 27.4 (24.8, 30.4) | 27.2 (24.8, 30.3) | 27.2 (24.8, 30.2) | 27.3 (24.6, 30.3) | 27.4 (24.7, 30.6) | 27.4 (24.8, 30.6) | 27.4 (24.8, 30.5) | 27.4 (24.8, 30.6) | 0.0007      |
| N missing                  | 1203              | 1694              | 1899              | 1751              | 1462              | 1292              | 1583              | 1442              | 1367              | 1589              | 1782              | 1874              | 2396              | 2630              |             |
| Waist circumference (cm)   | 99 (92, 106)      | 100 (93, 107)     | 100 (92, 107)     | 100 (93, 107)     | 100 (93, 108)     | 100 (93, 108)     | 100 (93, 108)     | 100 (93, 108)     | 101 (93, 109)     | 101 (93, 109)     | 101 (93, 110)     | 101 (94, 110)     | 101 (93, 110)     | 101 (94, 109)     | <0.0001     |
| N missing                  | 1306              | 1799              | 2111              | 1771              | 1409              | 1822              | 2079              | 2246              | 2138              | 2551              | 2984              | 3301              | 3789              | 4403              |             |
| Physical activity (days)** | 4 (1, 7)          | 4 (1, 7)          | 4 (1, 7)          | 4 (1, 7)          | 3 (1, 7)          | 4 (1, 7)          | 3 (1, 6)          | 3 (1, 7)          | 3 (1, 7)          | 4 (1, 7)          | 3 (1, 7)          | 3 (1, 6)          | 3 (1, 6)          | 3 (1, 6)          | <0.0001     |
| N missing                  | 140               | 237               | 551               | 377               | 24                | 112               | 59                | 55                | 40                | 37                | 56                | 35                | 59                | 68                |             |

\*Patients with diabetes only. \*\* Days during the last week of physical activity (at least 30 minutes per day). BMI, body mass index; BP, blood pressure; F, fasting; HbA1c, hemoglobin A1c; HDL-C, high-density lipoprotein cholesterol; LDL-C, low-density lipoprotein cholesterol; N, number; N/A, no data available; q1, lower quartile; q3, upper quartile.

**Table S5.** Mean (+/-SD) delta values between hospitalization and one-year follow-up for selected continuous variables.

| Year                     | 2006            | 2007            | 2008            | 2009            | 2010            | 2011                 | 2012                  | 2013                  | 2014                  | 2015               | 2016                 | 2017               | 2018               | 2019                | p for trend |
|--------------------------|-----------------|-----------------|-----------------|-----------------|-----------------|----------------------|-----------------------|-----------------------|-----------------------|--------------------|----------------------|--------------------|--------------------|---------------------|-------------|
| Systolic BP (mmHg)       | -25.2<br>(25.8) | -25.2<br>(26.0) | -24.5<br>(26.0) | -25.4<br>(25.8) | -25.8<br>(25.9) | -26.5<br>(25.7)      | -26.5<br>(25.5)       | -26.9<br>(26.0)       | -28.5<br>(26.4)       | -28.4<br>(25.3)    | -29.9<br>(25.2)      | -29.5<br>(25.5)    | -29.9<br>(25.1)    | -30.2<br>(24.9)     | <0.0001     |
| Diastolic BP (mmHg)      | -16.6<br>(13.5) | -16.7<br>(14.7) | -16.1<br>(14.6) | -17.2<br>(14.5) | -16.2<br>(14.1) | -16.2<br>(14.2)      | -16.0<br>(14.6)       | -16.7<br>(14.6)       | -17.2<br>(14.8)       | -17.5<br>(14.2)    | -18.1<br>(14.4)      | -17.9<br>(14.3)    | -18.4<br>(14.0)    | -20.1<br>(14.3)     | <0.0001     |
| LDL-C (mmol/L)           | -0.83<br>(1.11) | -0.75<br>(1.05) | -0.83<br>(1.10) | -0.78<br>(1.12) | -0.89<br>(1.11) | -0.91<br>(1.13)      | -0.93<br>(1.17)       | -1.02<br>(1.21)       | -1.10<br>(1.16)       | -1.13<br>(1.17)    | -1.23<br>(1.19)      | -1.24<br>(1.18)    | -1.26<br>(1.21)    | -1.29<br>(1.20)     | <0.0001     |
| F-glucose (mmol/L)       | -1.59<br>(3.33) | -1.40<br>(3.02) | -1.46<br>(3.08) | -1.52<br>(3.16) | -1.46<br>(3.17) | -1.47<br>(2.85)      | -1.36<br>(3.02)       | -1.30<br>(3.10)       | -1.40<br>(3.17)       | -1.37<br>(3.08)    | -1.42<br>(3.11)      | -1.37<br>(2.87)    | -1.45<br>(3.11)    | -1.62<br>(3.39)     | 0.670       |
| HbA1c (mmol/mol) *       | N/A             | N/A             | N/A             | N/A             | N/A             | -1.5 (-<br>9.0, 5.0) | -1.0 (-<br>11.0, 5.0) | -2.0 (-<br>10.0, 4.0) | -1.0 (-<br>10.0, 3.0) | 0.0 (-8.0,<br>6.0) | -1.0 (-<br>9.0, 5.0) | 0.0 (-7.0,<br>6.0) | 0.0 (-7.0,<br>5.0) | -1.0 (-9.0,<br>4.0) | 0.297       |
| BMI (kg/m <sup>2</sup> ) | 0.24<br>(1.80)  | 0.17<br>(1.91)  | 0.30<br>(1.80)  | 0.23<br>(1.88)  | 0.25<br>(1.86)  | 0.23<br>(1.91)       | 0.21<br>(1.91)        | 0.09<br>(1.91)        | 0.06<br>(1.88)        | 0.04<br>(2.06)     | -0.03<br>(2.00)      | -0.01<br>(1.97)    | -0.11<br>(2.09)    | -0.15<br>(2.11)     | <0.0001     |

\*Patients with diabetes only. BMI, body mass index; BP, blood pressure; CCU, coronary care unit; F, fasting; HbA1c, hemoglobin A1c; LDL-C, low-density lipoprotein cholesterol; N, number; N/A, no data available; SD, standard deviation.

**Table S6.** Patient demographics for the EUROASPIRE surveys III, IV and V (1-3).

10

| Survey | Years conducted | Number of patients | % men | Number of participating centres | Number of participating countries | Median (IQR) time (years) after index event |
|--------|-----------------|--------------------|-------|---------------------------------|-----------------------------------|---------------------------------------------|
| III    | 2006-2007       | 8966               | 73%   | 76                              | 22                                | 1.2 (1.0-1.8)                               |
| IV     | 2011-2012       | 7998               | 76%   | 78                              | 24                                | 1.4 (1.0-1.9)                               |
| V      | 2016-2017       | 8261               | 74%   | 131                             | 27                                | 1.1 (0.8-1.6)                               |

IQR, inter quartile range.

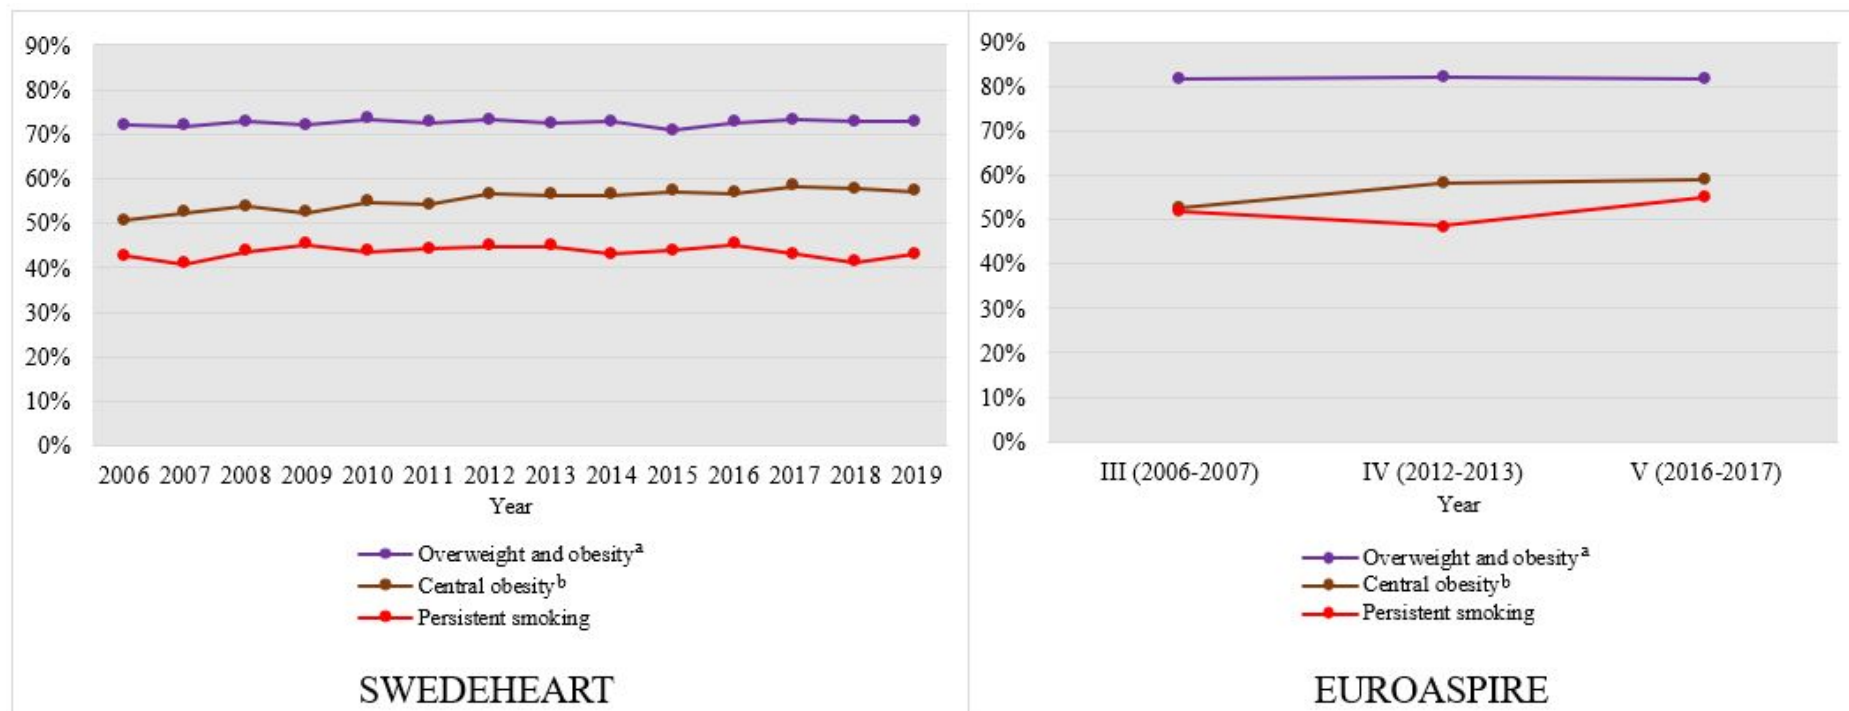

**Figure S1.** Lifestyle factors at one-year in SWEDEHEART (left panel) and EUROASPIRE (right panel) where comparable data in the two cohorts was available (1-3). <sup>a</sup>Body mass index  $\geq 25$  kg/m<sup>2</sup>; <sup>b</sup>waist circumference  $\geq 102$  cm for men and  $\geq 88$  cm for women.

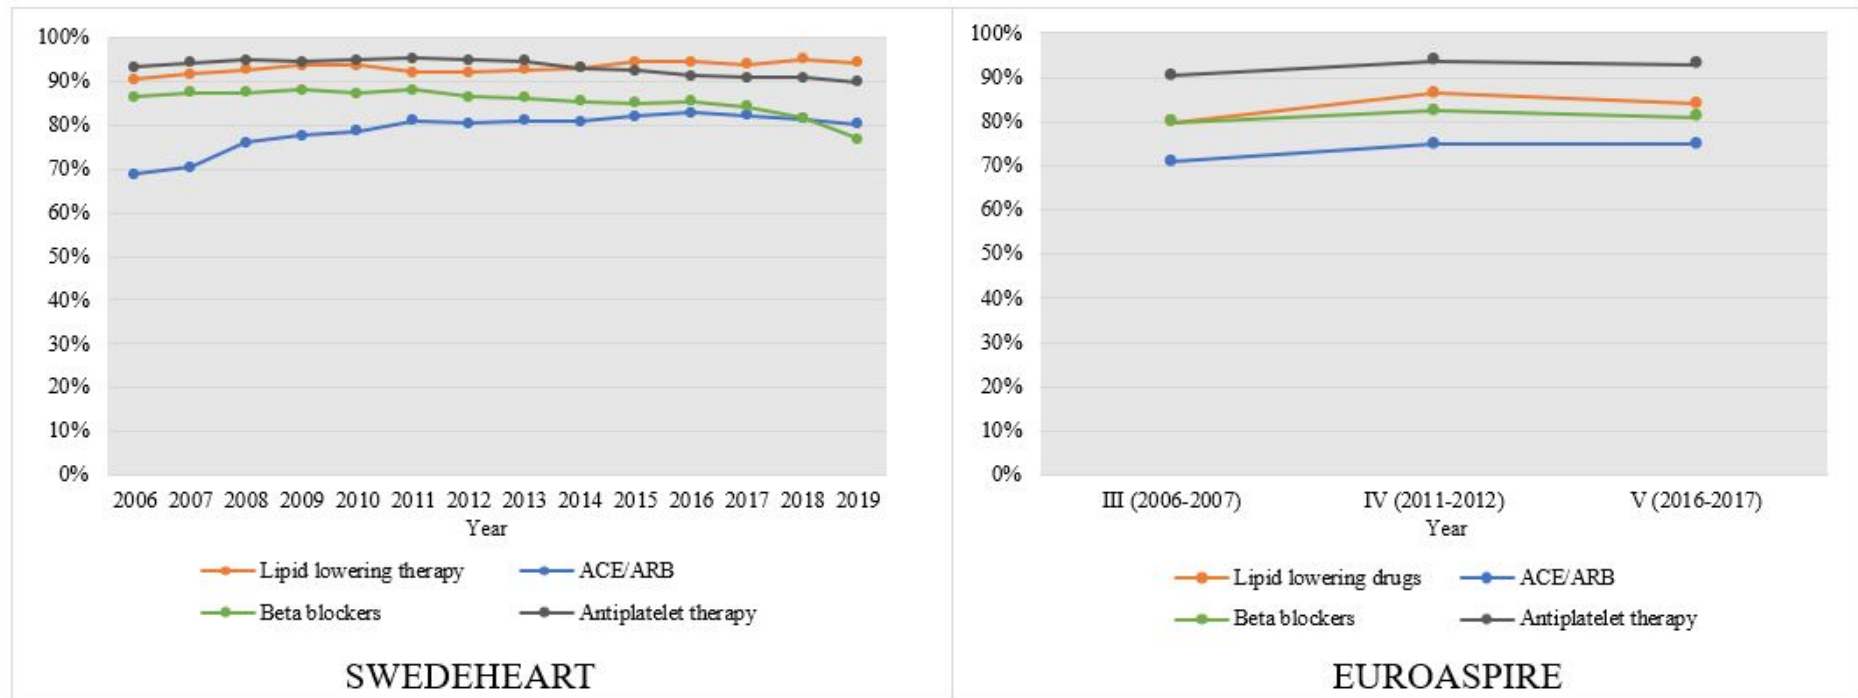

**Figure S2.** Proportion of patients at one-year follow-up for each year 2006-2019 in SWEDEHEART treated with lipid lowering therapy (statins or ezetimibe), ACEi or ARB, beta blockers or antiplatelet therapy (ASA or P2Y<sub>12</sub>-receptor antagonists). Corresponding data from the EUROASPIRE III-V surveys shown on the right panel of the figure (1-3). In EUROASPIRE lipid lowering drugs included statins, ezetimibe, fibrates, bile acid sequestrants and nicotinic acid.

ACEi, angiotensin converting enzyme inhibitors; ARB, angiotensin receptor blockers; ASA, acetylsalicylic acid.

**References**

1. Kotseva K, De Backer G, De Bacquer D, Ryden L, Hoes A, Grobbee D, et al. Lifestyle and impact on cardiovascular risk factor control in coronary patients across 27 countries: Results from the European Society of Cardiology ESC-EORP EUROASPIRE V registry. *Eur J Prev Cardiol.* 2019;26(8):824-35.
2. Kotseva K, Wood D, De Backer G, De Bacquer D, Pyorala K, Keil U, et al. EUROASPIRE III: a survey on the lifestyle, risk factors and use of cardioprotective drug therapies in coronary patients from 22 European countries. *Eur J Cardiovasc Prev Rehabil.* 2009;16(2):121-37.
3. Kotseva K, Wood D, De Bacquer D, De Backer G, Ryden L, Jennings C, et al. EUROASPIRE IV: A European Society of Cardiology survey on the lifestyle, risk factor and therapeutic management of coronary patients from 24 European countries. *Eur J Prev Cardiol.* 2016;23(6):636-48.

STROBE Statement—Checklist of items that should be included in reports of *cohort studies*

|                              | Item No | Recommendation                                                                                                                                                                                                                                                                                                         | Page No                 |
|------------------------------|---------|------------------------------------------------------------------------------------------------------------------------------------------------------------------------------------------------------------------------------------------------------------------------------------------------------------------------|-------------------------|
| <b>Title and abstract</b>    | 1       | (a) Indicate the study's design with a commonly used term in the title or the abstract<br>(b) Provide in the abstract an informative and balanced summary of what was done and what was found                                                                                                                          | 1-2<br>2-3              |
| <b>Introduction</b>          |         |                                                                                                                                                                                                                                                                                                                        |                         |
| Background/rationale         | 2       | Explain the scientific background and rationale for the investigation being reported                                                                                                                                                                                                                                   | 4-5                     |
| Objectives                   | 3       | State specific objectives, including any prespecified hypotheses                                                                                                                                                                                                                                                       | 5                       |
| <b>Methods</b>               |         |                                                                                                                                                                                                                                                                                                                        |                         |
| Study design                 | 4       | Present key elements of study design early in the paper                                                                                                                                                                                                                                                                | 5                       |
| Setting                      | 5       | Describe the setting, locations, and relevant dates, including periods of recruitment, exposure, follow-up, and data collection                                                                                                                                                                                        | 5-7                     |
| Participants                 | 6       | (a) Give the eligibility criteria, and the sources and methods of selection of participants. Describe methods of follow-up<br>(b) For matched studies, give matching criteria and number of exposed and unexposed                                                                                                      | 5-7<br>N/A              |
| Variables                    | 7       | Clearly define all outcomes, exposures, predictors, potential confounders, and effect modifiers. Give diagnostic criteria, if applicable                                                                                                                                                                               | 7-8                     |
| Data sources/<br>measurement | 8*      | For each variable of interest, give sources of data and details of methods of assessment (measurement). Describe comparability of assessment methods if there is more than one group                                                                                                                                   | 5-7                     |
| Bias                         | 9       | Describe any efforts to address potential sources of bias                                                                                                                                                                                                                                                              | N/A                     |
| Study size                   | 10      | Explain how the study size was arrived at                                                                                                                                                                                                                                                                              | 5-6                     |
| Quantitative variables       | 11      | Explain how quantitative variables were handled in the analyses. If applicable, describe which groupings were chosen and why                                                                                                                                                                                           | 5-8                     |
| Statistical methods          | 12      | (a) Describe all statistical methods, including those used to control for confounding<br>(b) Describe any methods used to examine subgroups and interactions<br>(c) Explain how missing data were addressed<br>(d) If applicable, explain how loss to follow-up was addressed<br>(e) Describe any sensitivity analyses | 8                       |
| <b>Results</b>               |         |                                                                                                                                                                                                                                                                                                                        |                         |
| Participants                 | 13*     | (a) Report numbers of individuals at each stage of study—eg numbers potentially eligible, examined for eligibility, confirmed eligible, included in the study, completing follow-up, and analysed<br>(b) Give reasons for non-participation at each stage<br>(c) Consider use of a flow diagram                        | 9                       |
| Descriptive data             | 14*     | (a) Give characteristics of study participants (eg demographic, clinical, social) and information on exposures and potential confounders<br>(b) Indicate number of participants with missing data for each variable of interest<br>(c) Summarise follow-up time (eg, average and total amount)                         | 9 and<br>Tables<br>S1-3 |
| Outcome data                 | 15*     | Report numbers of outcome events or summary measures over time                                                                                                                                                                                                                                                         | Table<br>S4             |



1  
2  
3  
4  
5  
6  
7  
8  
9  
10  
11  
12  
13  
14  
15  
16  
17  
18  
19  
20  
21  
22  
23  
24  
25  
26  
27  
28  
29  
30  
31  
32  
33  
34  
35  
36  
37  
38  
39  
40  
41  
42  
43  
44  
45  
46  
47  
48  
49  
50  
51  
52  
53  
54  
55  
56  
57  
58  
59  
60

|                          |    |                                                                                                                                                                                                                                                                                                                                                                                                                       |                                    |
|--------------------------|----|-----------------------------------------------------------------------------------------------------------------------------------------------------------------------------------------------------------------------------------------------------------------------------------------------------------------------------------------------------------------------------------------------------------------------|------------------------------------|
| Main results             | 16 | (a) Give unadjusted estimates and, if applicable, confounder-adjusted estimates and their precision (eg, 95% confidence interval). Make clear which confounders were adjusted for and why they were included<br><br>(b) Report category boundaries when continuous variables were categorized<br><br>(c) If relevant, consider translating estimates of relative risk into absolute risk for a meaningful time period | 10-11<br>Fig 1-5<br>Tables<br>S1-5 |
| Other analyses           | 17 | Report other analyses done—eg analyses of subgroups and interactions, and sensitivity analyses                                                                                                                                                                                                                                                                                                                        | Table<br>S6<br>Figures<br>S1-2     |
| <b>Discussion</b>        |    |                                                                                                                                                                                                                                                                                                                                                                                                                       |                                    |
| Key results              | 18 | Summarise key results with reference to study objectives                                                                                                                                                                                                                                                                                                                                                              | 11                                 |
| Limitations              | 19 | Discuss limitations of the study, taking into account sources of potential bias or imprecision. Discuss both direction and magnitude of any potential bias                                                                                                                                                                                                                                                            | 16-17                              |
| Interpretation           | 20 | Give a cautious overall interpretation of results considering objectives, limitations, multiplicity of analyses, results from similar studies, and other relevant evidence                                                                                                                                                                                                                                            | 11-17                              |
| Generalisability         | 21 | Discuss the generalisability (external validity) of the study results                                                                                                                                                                                                                                                                                                                                                 | 11-17                              |
| <b>Other information</b> |    |                                                                                                                                                                                                                                                                                                                                                                                                                       |                                    |
| Funding                  | 22 | Give the source of funding and the role of the funders for the present study and, if applicable, for the original study on which the present article is based                                                                                                                                                                                                                                                         | N/A                                |

\*Give information separately for exposed and unexposed groups.

**Note:** An Explanation and Elaboration article discusses each checklist item and gives methodological background and published examples of transparent reporting. The STROBE checklist is best used in conjunction with this article (freely available on the Web sites of PLoS Medicine at <http://www.plosmedicine.org/>, Annals of Internal Medicine at <http://www.annals.org/>, and Epidemiology at <http://www.epidem.com/>). Information on the STROBE Initiative is available at <http://www.strobe-statement.org>.

# BMJ Open

## Temporal trends in cardiovascular risk factors, lifestyle, and secondary preventive medication for patients with myocardial infarction attending cardiac rehabilitation in Sweden 2006-2019: a registry-based cohort study

|                                 |                                                                                                                                                                                                                                                                                                                                                                                                                                                                                                                                                                                                                                                                                                                                                                                                                                                                                                 |
|---------------------------------|-------------------------------------------------------------------------------------------------------------------------------------------------------------------------------------------------------------------------------------------------------------------------------------------------------------------------------------------------------------------------------------------------------------------------------------------------------------------------------------------------------------------------------------------------------------------------------------------------------------------------------------------------------------------------------------------------------------------------------------------------------------------------------------------------------------------------------------------------------------------------------------------------|
| Journal:                        | <i>BMJ Open</i>                                                                                                                                                                                                                                                                                                                                                                                                                                                                                                                                                                                                                                                                                                                                                                                                                                                                                 |
| Manuscript ID                   | bmjopen-2022-069770.R1                                                                                                                                                                                                                                                                                                                                                                                                                                                                                                                                                                                                                                                                                                                                                                                                                                                                          |
| Article Type:                   | Original research                                                                                                                                                                                                                                                                                                                                                                                                                                                                                                                                                                                                                                                                                                                                                                                                                                                                               |
| Date Submitted by the Author:   | 28-Feb-2023                                                                                                                                                                                                                                                                                                                                                                                                                                                                                                                                                                                                                                                                                                                                                                                                                                                                                     |
| Complete List of Authors:       | Leosdottir, Margret; Lund University, Department of Clinical Sciences Malmö; Skanes universitetssjukhus Malmö, Department of Cardiology Hagstrom, Emil; Uppsala University, Department of Medical Sciences, Cardiology; Uppsala Clinical Research Center<br>Hadziosmanovic, Nermin; Uppsala University, Department of Medical Sciences, Cardiology<br>Norhammar, Anna; Karolinska Institutet; Capio Sankt Görans Sjukhus Lindahl, Bertil; Uppsala University, Department of Medical Sciences, Cardiology; Uppsala Clinical Research Center<br>Hambraeus, Kristina; Falun Hospital, Department of Cardiology<br>Jernberg, Tomas; Danderyd University Hospital, Department of Clinical Sciences<br>Bäck, Maria; Linköping University, Department of Medical and Health Sciences, Division of Physiotherapy; Sahlgrenska University Hospital, Department of Occupational Therapy and Physiotherapy |
| <b>Primary Subject Heading</b>: | Cardiovascular medicine                                                                                                                                                                                                                                                                                                                                                                                                                                                                                                                                                                                                                                                                                                                                                                                                                                                                         |
| Secondary Subject Heading:      | Rehabilitation medicine                                                                                                                                                                                                                                                                                                                                                                                                                                                                                                                                                                                                                                                                                                                                                                                                                                                                         |
| Keywords:                       | Myocardial infarction < CARDIOLOGY, REHABILITATION MEDICINE, Quality in health care < HEALTH SERVICES ADMINISTRATION & MANAGEMENT, Coronary heart disease < CARDIOLOGY, Risk management < HEALTH SERVICES ADMINISTRATION & MANAGEMENT                                                                                                                                                                                                                                                                                                                                                                                                                                                                                                                                                                                                                                                           |
|                                 |                                                                                                                                                                                                                                                                                                                                                                                                                                                                                                                                                                                                                                                                                                                                                                                                                                                                                                 |

SCHOLARONE™  
Manuscripts



I, the Submitting Author has the right to grant and does grant on behalf of all authors of the Work (as defined in the below author licence), an exclusive licence and/or a non-exclusive licence for contributions from authors who are: i) UK Crown employees; ii) where BMJ has agreed a CC-BY licence shall apply, and/or iii) in accordance with the terms applicable for US Federal Government officers or employees acting as part of their official duties; on a worldwide, perpetual, irrevocable, royalty-free basis to BMJ Publishing Group Ltd ("BMJ") its licensees and where the relevant Journal is co-owned by BMJ to the co-owners of the Journal, to publish the Work in this journal and any other BMJ products and to exploit all rights, as set out in our [licence](#).

The Submitting Author accepts and understands that any supply made under these terms is made by BMJ to the Submitting Author unless you are acting as an employee on behalf of your employer or a postgraduate student of an affiliated institution which is paying any applicable article publishing charge ("APC") for Open Access articles. Where the Submitting Author wishes to make the Work available on an Open Access basis (and intends to pay the relevant APC), the terms of reuse of such Open Access shall be governed by a Creative Commons licence – details of these licences and which [Creative Commons](#) licence will apply to this Work are set out in our licence referred to above.

Other than as permitted in any relevant BMJ Author's Self Archiving Policies, I confirm this Work has not been accepted for publication elsewhere, is not being considered for publication elsewhere and does not duplicate material already published. I confirm all authors consent to publication of this Work and authorise the granting of this licence.

1  
2  
3 Temporal trends in cardiovascular risk factors, lifestyle, and secondary preventive medication  
4 for patients with myocardial infarction attending cardiac rehabilitation in Sweden 2006-2019:  
5 a registry-based cohort study  
6  
7  
8  
9

10  
11  
12 Margret Leosdottir <sup>a,b</sup>, Emil Hagström <sup>c,d</sup>, Nermin Hadziosmanovic<sup>c</sup>, Anna Norhammar<sup>e,f</sup>, Bertil  
13 Lindahl<sup>c,d</sup>, Kristina Hambræus<sup>g</sup>, Tomas Jernberg<sup>h</sup> and Maria Bäck<sup>i,j</sup>, for the SWEDEHEART-  
14  
15 CR study group  
16  
17  
18  
19

20  
21 <sup>a</sup>Department of Clinical Sciences Malmö, Faculty of Medicine, Lund University, Malmö,  
22 Sweden; <sup>b</sup>Department of Cardiology, Skane University Hospital, Malmö, Sweden; <sup>c</sup>Department  
23 of Medical Sciences, Cardiology, Uppsala University, Uppsala, Sweden; <sup>d</sup>Uppsala Clinical  
24 Research Centre, Uppsala, Sweden; <sup>e</sup>Institution of Medicine, Karolinska Institute at Karolinska  
25 University Hospital, Solna, Sweden; <sup>f</sup>Capio S:t Göran hospital, Stockholm, Sweden;  
26  
27 <sup>g</sup>Department of Cardiology, Falun Hospital, Falun, Sweden; <sup>h</sup>Department of Clinical Sciences,  
28 Danderyd Hospital, Karolinska Institute, Stockholm, Sweden; <sup>i</sup>Department of Medical and  
29 Health Sciences, Division of Physiotherapy, Linköping University, Linköping, Sweden;  
30  
31 <sup>j</sup>Department of Occupational Therapy and Physiotherapy, Sahlgrenska University Hospital,  
32 Gothenburg, Sweden  
33  
34  
35  
36  
37  
38  
39  
40  
41  
42  
43  
44  
45  
46

47 **Correspondence:** Margret Leosdottir, Department of Cardiology, Skane University Hospital,  
48 Jan Waldenströms gata 15 plan 3, 20502 Malmo, Sweden. Telephone number +46 732 561 536,  
49 margret.leosdottir@med.lu.se.  
50  
51  
52  
53

54  
55 **Word count:** 4080  
56  
57  
58  
59  
60

## Abstract

**Objectives.** Registries have been highlighted as means to improve quality of care. Here we describe temporal trends in risk factors, lifestyle, and preventive medication for patients after myocardial infarction (MI) registered in the quality registry SWEDEHEART.

**Design.** A registry-based cohort study.

**Setting.** All coronary care units and cardiac rehabilitation (CR) centres in Sweden.

**Participants.** Patients attending a CR visit at one-year post-MI 2006-2019 were included (n=81363, 18-74 years, 74.7% men).

**Outcome measures.** Outcome measures at one-year follow-up included blood pressure (BP) <140/90 mmHg, low-density lipoprotein-cholesterol (LDL-C) <1.8 mmol/L, persistent smoking, overweight/obesity, central obesity, diabetes prevalence, inadequate physical activity, and prescription of secondary preventive medication. Descriptive statistics and testing for trends were applied.

**Results.** The proportion of patients attaining the targets for BP <140/90 mmHg increased from 65.2% (2006) to 86.0% (2019), and LDL-C <1.8 mmol/L from 29.8% (2006) to 66.9% (2019,  $p<0.0001$  both). While smoking at the time of MI decreased (32.0% to 26.5%,  $p<0.0001$ ), persistent smoking at one-year was unchanged (42.8% to 43.2%,  $p=0.672$ ) as was the prevalence of overweight/obesity (71.9% to 72.9%,  $p=0.559$ ). Central obesity (50.5% to 57.0%), diabetes (18.2% to 27.2%) and patients reporting inadequate levels of physical activity (57.0% to 61.5%) increased ( $p<0.0001$  for all). From 2007, >90.0% of patients were prescribed statins and approximately 98% antiplatelet and/or anticoagulant therapy. Angiotensin-converting enzyme inhibitor/angiotensin receptor blocker prescription increased from 68.7% (2006) to 80.2% (2019,  $p<0.0001$ ).

1  
2  
3 **Conclusions.** While little change was observed for persistent smoking and overweight/obesity,  
4 large improvements were observed for LDL-C and BP target achievements and prescription of  
5 preventive medication for Swedish patients after MI 2006-2019. Compared to published results  
6 from patients with coronary artery disease in Europe during the same period, these  
7 improvements were considerably larger. Continuous auditing and open comparisons of CR  
8 outcomes might possibly explain some of the observed improvements and differences.  
9  
10  
11  
12  
13  
14  
15  
16  
17  
18

19 **Abstract word count:** 299  
20  
21  
22

23 **Keywords:** Cardiac rehabilitation, risk factors, registry, myocardial infarction, secondary  
24 prevention, SWEDEHEART  
25  
26  
27  
28  
29

### 30 **Article summary**

#### 31 *Strengths and limitations of this study*

- 32  
33 • The major strengths of the study are the broad representability and national coverage of  
34 data including all patients <75 years of age who suffered a myocardial infarction (MI)  
35 and were followed in the Swedish quality registry SWEDEHEART.  
36  
37
- 38 • Major modifiable cardiovascular risk factors were included; blood pressure levels, low-  
39 density lipoprotein cholesterol levels, smoking habits, self-reported physical activity,  
40 overweight, obesity, central obesity, as well as prescription of secondary preventive  
41 medication.  
42  
43
- 44 • The major limitations of the study are the lack of data on MI patients not attending CR  
45 and on those  $\geq 75$  years of age.  
46  
47  
48  
49  
50  
51  
52  
53  
54  
55  
56  
57  
58  
59  
60

- Also, comparing our data with other survey and audit data is limited by differences in patient selections, different rates of CR participation, time of follow-up, and differences in measurement methods.

## Introduction

Treating cardiovascular risk factors and adopting healthy behaviours after myocardial infarction (MI) is the most effective way to reduce recurrent cardiovascular events (1, 2). Based on abundant and continuously accumulating evidence, the European Society of Cardiology (ESC) regularly publishes guidelines on cardiovascular disease prevention in clinical practice (3). Secondary prevention is usually provided through cardiac rehabilitation (CR) - a complex intervention entailing the optimal use of cardio-protective medication, exercise training, behavioural modification, patient education, and psychosocial counselling (4). In the latest ESC prevention guidelines, participation in CR post-MI is given the highest possible recommendation and level of evidence (3). Still, implementing the guidelines in clinical practice has proven to be a challenge, with goal attainment in CR being far from optimal (5, 6). Especially it seems challenging to reach lifestyle associated targets such as being adequately physically active and active smokers at the time of the MI being abstinent from smoking. Furthermore, only marginal improvements have been observed in goal attainment for blood pressure (BP) and low-density lipoprotein cholesterol (LDL-C) during the last ten years despite increasing availability of more effective pharmacotherapy (5).

Systematically monitoring quality of care, structure, and process of delivery within CR has been highlighted as a possible way to increase prevention target attainment (7-11). The Swedish Web-system for Enhancement and Development of Evidence-based care in Heart disease Evaluated According to Recommended Therapies (SWEDEHEART) is a nationwide quality registry that records patient characteristics, treatments, and outcomes of

1  
2  
3 consecutive patients with MI admitted to coronary care units in Sweden (12). Registration of  
4 CR quality and process-based metrics for patients after an MI started in 2005. Since 2006 data  
5 has been collected for patients under the age of 75 at two routine follow-up visits within CR -  
6 at two-months and one-year post-MI (13, 14). Referrals to CR are automatically generated  
7 through the electronic registry system for all MI patients and since 2016 more than 75% of all  
8 eligible patients, who are alive at one-year after the acute event, attend the one-year CR follow-  
9 up visit (15). Data from SWEDEHEART is available online and is updated continuously,  
10 facilitating open comparisons between CR programs in the country (16).  
11  
12  
13  
14  
15  
16  
17  
18  
19  
20

21 The objective of this study was to describe temporal trends 2006-2019 in risk  
22 factor prevalence, lifestyle, and prescription of secondary preventive medication at one-year  
23 after MI for patients attending CR in Sweden, hypothesising that a national quality registry can  
24 contribute to improving outcomes in CR.  
25  
26  
27  
28  
29  
30  
31  
32

## 33 **Methods**

### 34 *Patient population and settings*

35 In this retrospective registry-based cohort study, data on all patients i) with a Swedish national  
36 identification number, ii) aged 18-74 years, iii) admitted for a first time or recurrent MI (ICD  
37 codes I21, I22 or I23), and iv) having a one-year CR follow-up visit registered in  
38 SWEDEHEART between January 1<sup>st</sup> 2006 and December 31<sup>st</sup> 2019 were used. Since patients  
39 with recurrent MI are included in SWEDEHEART, the same patient can be registered on  
40 several occasions, although not more than once per year since each individual patient can only  
41 generate one SWEDEHEART-based follow-up per year. Until 2018 it was mandatory to  
42 register patients <75 years of age, while registration of those 75 years or older was optional.  
43 For this reason, we chose to apply the age limit of 18-74 years throughout the whole period in  
44 the current study. No other exclusion criteria were applied.  
45  
46  
47  
48  
49  
50  
51  
52  
53  
54  
55  
56  
57  
58  
59  
60



### *Patient and Public Involvement statement*

Patients were not involved in the design or conduct of the current study. The SWEDEHEART registry's steering group has, however, included a patient representative for many years. The steering group is involved in decisions concerning variables included in the registry and how results generated from registry data are disseminated to the general public.

### *Data collection*

#### Hospitalization data

Detailed description of the SWEDEHEART registry has previously been published (12, 13). In short, the registry includes more than 100 variables collected during hospitalization, describing patient characteristics and acute MI care (12). These include age, sex, smoking status (current smoker, previous smoker [stopped smoking >1 month] or never smoker), history of diabetes, hypertension, atherosclerotic cardiovascular disease (ASCVD: MI, percutaneous coronary intervention [PCI], coronary artery by-pass grafting [CABG] or stroke), and current pharmacotherapy, collected from electronic medical records and by self-report. Data on race/ethnicity is not available in SWEDEHEART. Height (cm) and weight (kg) is collected, measured during hospitalization or self-reported, and body-mass index (BMI, kg/m<sup>2</sup>) calculated. Waist circumference is not measured during hospitalization. Systolic and diastolic blood pressures (BP, mmHg) are registered. Blood samples collected include total cholesterol, triglycerides, low-density lipoprotein cholesterol (LDL-C), high-density lipoprotein cholesterol (HDL-C), fasting plasma glucose, and HbA1c (for patients with diabetes only). In SWEDEHEART, estimated LDL-C according to the Friedewald formula:  $LDL-C = \text{total cholesterol} - HDL-C - (0,45 \times \text{triglycerides})$  is used to minimize inter-laboratory differences in LDL-C (17). In case of triglycerides >4.5 mmol/L or missing values on total cholesterol, HDL-

1  
2  
3 C, or triglycerides, directly measured LDL-C is used instead. In the SWEDEHEART user  
4 manual it is recommended that laboratory measures are performed according to local laboratory  
5 routines.  
6  
7  
8

### 9 10 Cardiac rehabilitation data

11  
12 Approximately 80 variables are collected at CR visits at two-months (time frame 6-10 weeks)  
13 and one-year (time frame 11-13 months) post-MI (13). These include weight and waist  
14 circumference, systolic and diastolic BP, blood samples (lipids, fasting plasma glucose, and in  
15 patients with diabetes HbA1c), smoking status and current pharmacotherapy. Additionally,  
16 patients report how many days during the last week they have been physically active for a  
17 minimum of 30 minutes (at least 10 minutes at a time) at an intensity that will induce shortness  
18 of breath and a slightly increased pulse, corresponding to a brisk walk.  
19  
20  
21  
22  
23  
24  
25  
26  
27

28 All data in SWEDEHEART is registered online. Data validity is continuously  
29 monitored, with sampling confirming >95% agreement with data from medical records (12,  
30 13).  
31  
32  
33  
34  
35  
36  
37

### 38 *Exposure and outcome variables*

39  
40 Exposure in this study was defined as the calendar year of the one-year follow-up visit.  
41  
42 Outcome variables at one-year follow-up included the following: BP <140/90 mmHg (both  
43 systolic and diastolic BP targets fulfilled, same goal irrespective of diabetes status); LDL-C  
44 <1.8 mmol/L; diabetes prevalence; persistent smoking (proportion of smokers at the time of MI  
45 who were still smoking at one-year follow-up); inadequate physical activity (being physically  
46 active [as defined above] <5 days/week); overweight/obesity (BMI  $\geq 25$  kg/m<sup>2</sup>); central obesity  
47 (waist circumference  $\geq 102$  cm for men and  $\geq 88$  cm for women); prescription of secondary  
48 preventive medication: lipid lowering drugs (statins and/or ezetimibe), angiotensin converting  
49 enzyme inhibitors (ACEi) or angiotensin receptor blockers (ARB), beta blockers, antiplatelet  
50  
51  
52  
53  
54  
55  
56  
57  
58  
59  
60

1  
2  
3 agents (acetylsalicylic acid [ASA] and/or P2Y<sub>12</sub>-receptor antagonists) and anticoagulants  
4  
5 (warfarin or direct oral anticoagulants). Registration of the use of proprotein convertase  
6  
7 subtilisin/kexin 9 (PCSK9) inhibitors started in SWEDEHEART in 2017. As information on  
8  
9 use prior to 2017 was not available, as well as the use being minimal in the first years (0.5-  
10  
11 1.5%) we decided to include only statins and ezetimibe in the definition of lipid lowering  
12  
13 therapy (15).  
14  
15

### 16 17 18 19 *Statistical analysis*

20  
21 The distribution of continuous variables was assessed by visual inspection of histograms and  
22  
23 Q-Q plots. Most continuous variables were non-normally distributed, and are presented as  
24  
25 medians (quartile 1, quartile 3), apart from delta values which are presented as means  $\pm$ standard  
26  
27 deviations (SD). Data for categorical variables is presented as percentages. Trend tests were  
28  
29 performed using Cochran-Armitage trend test for categorical variables and Wilcoxon type test  
30  
31 for continuous variables. To compare data between years 2006 and 2019, Chi-square test was  
32  
33 used for categorical variables and Wilcoxon rank sum test for continuous variables. Outcomes  
34  
35 were analysed as dichotomized variables. Median values for continuous outcome variables and  
36  
37 mean delta values between baseline (time of index event) were also analysed. For waist  
38  
39 circumference delta was based on the two-month and one-year follow-up visit measurements.  
40  
41 No imputation was performed on missing data. Data was analysed using SAS version 9.4 (SAS  
42  
43 Institute, Cary, North Carolina, USA). A 2-sided p value of  $<0.05$  was considered statistically  
44  
45 significant.  
46  
47  
48  
49  
50  
51  
52  
53  
54  
55

## 56 **Results**

### 57 58 *Patient characteristics during hospitalization* 59 60

1  
2  
3 Between 2006 and 2019, 81363 MI cases were registered in SWEDHEART, representing  
4  
5 78679 individual patients 18-74 years of age at the time of the acute event who subsequently  
6  
7 attended a one-year follow-up registry visit within CR. Patients were predominantly male, the  
8  
9 proportion increasing slightly during the period from 73.5% in 2006 to 75.2% in 2019 (p-trend  
10  
11 <0.0001). The median (q1, q3) age was 63.0 (57.0, 69.0) years in 2006 and 65.0 (58.0-70.0)  
12  
13 years in 2019 (p-trend <0.0001). Further patient characteristics can be seen in Fig. 1 and Tables  
14  
15 S1-S3. The most prominent changes observed during the period were a decrease in the  
16  
17 proportion of smokers from 32.0% to 26.5% (p-trend <0.0001), an increase in the proportion of  
18  
19 overweight and obese patients (BMI  $\geq 25$  kg/m<sup>2</sup>) from 70.7% to 74.1% (p-trend <0.0001), and  
20  
21 an increase in the use of lipid-lowering drugs (statins and/or ezetimibe) (24.5% to 28.6%, p-  
22  
23 trend=0.004) or antihypertensive drugs (ACEi/ARB, beta blockers, diuretics and/or calcium  
24  
25 channel blockers) (47.6% to 51.2%, p-trend <0.0001) prior to admission (Fig. 1). The  
26  
27 proportion of patients being revascularized (by PCI or CABG) during hospitalization and the  
28  
29 proportion being prescribed statins, ezetimibe, ACEi/ARB, and P2Y<sub>12</sub>-receptor antagonist  
30  
31 therapy at discharge increased during the observed period (p-trend <0.0001 for all), while the  
32  
33 proportion receiving beta blockers at discharge decreased (p-trend <0.0001) (Table S3).  
34  
35  
36  
37  
38  
39  
40  
41

#### 42 *Blood pressure, lipids, and diabetes*

43  
44 The proportion of patients achieving BP <140/90 mmHg at the one-year follow-up visit  
45  
46 increased from 65.2% in 2006 to 86.0% in 2019 (p-trend <0.0001) (Fig 2). Regarding LDL-C,  
47  
48 29.8% were treated to the <1.8 mmol/L target in 2006, increasing to 66.9% in 2019 (p-trend  
49  
50 <0.0001), with 30.4% having an LDL-C of <1.4 mmol/L in 2019 (Fig 2). Mean delta values for  
51  
52 systolic and diastolic BP and LDL-C between hospitalization and one-year follow-up also  
53  
54 increased during the observed period (p for trend <0.0001 for all) (Fig. 3). The one-year median  
55  
56  
57  
58  
59  
60

1  
2  
3 SBP, DBP, total cholesterol, LDL-C, and triglycerides decreased over the period, while HDL-  
4  
5 C remained unchanged (Table S4).  
6  
7

8 The prevalence of diabetes at the one-year follow-up increased from 18.2% in 2006 to 27.2%  
9  
10 in 2019 (p-trend <0.0001) (Fig. 4). Between 2006 and 2013 there was a minimal difference  
11  
12 between the prevalence of diabetes at hospitalization and at one-year follow-up ( $\pm 1\%$ -point).  
13  
14 Since 2014, however, the difference increased, in 2019 being 4.6%-points higher at the one-  
15  
16 year follow-up. HbA1c (patients with diabetes only) at the one-year follow-up decreased from  
17  
18 56 mmol/mol to 52 mmol/mol (p-trend <0.0001) while the delta value between hospitalization  
19  
20 and one-year remained unchanged (Tables S4-S5). Fasting glucose at one-year (all patients)  
21  
22 increased from 5.7 mmol/L to 6.0 mmol/L over the period (p-trend <0.0001) (Table S4).  
23  
24  
25  
26  
27  
28

### 29 *Lifestyle*

30  
31 The prevalence of persistent smoking, inadequate physical activity, overweight/obesity, and  
32  
33 central obesity at one-year post-MI can be seen in Fig. 4. Persistent smoking, i.e., the proportion  
34  
35 of smokers at the time of MI who were still smoking at the one-year follow-up, remained  
36  
37 unchanged over the period (42.8% in 2006 and 43.2% 2019, p-trend=0.672). The proportion of  
38  
39 patients reporting inadequate physical activity increased during the observed period from  
40  
41 57.0% to 61.5% (p-trend <0.0001). While the prevalence of patients who were overweight or  
42  
43 obese at hospitalization increased, the proportion at one-year follow-up was similar (71.9% to  
44  
45 72.9%, p-trend=0.559). In 2006-2015 an increase in BMI between baseline and one-year  
46  
47 follow-up was observed (between 0.04 and 0.30 kg/m<sup>2</sup>), while in 2016-2019 the difference was  
48  
49 negative (between -0.01 and -0.15 kg/m<sup>2</sup>, p-trend <0.0001) (Table S5). The prevalence of  
50  
51 central obesity increased from 50.5% in 2006 to 57.0% in 2019 (p-trend <0.0001). Yearly  
52  
53 median values at one-year follow-up for number of days during the last week the patients had  
54  
55 been physically active, BMI, and waist circumference are shown in Table S4.  
56  
57  
58  
59  
60

### *Secondary preventive medication*

The use of secondary preventive medication at the one-year follow-up visit can be seen in Fig. 5. Since 2007 more than 90% of all patients were prescribed statins. Between 4% and 6% of the patients were prescribed ezetimibe prior to 2014 where after its use increased successively to 29.8% in 2019 (p-trend <0.0001). Approximately 98% were prescribed either an antiplatelet or anticoagulant therapy throughout the period, with the proportion of patients receiving anticoagulant therapy doubling from 6.4% in 2006 to 12.0% in 2019 (p-trend <0.0001). ACEi/ARB prescription increased from 68.7% to 80.2% (p-trend <0.0001) while the use of beta blockers decreased from 86.4% to 76.7% (p-trend <0.0001). The decrease was mostly driven by a decrease in use among patients with preserved ejection fraction (from 85.1% in 2006 to 70.5% in 2019, p for difference <0.0001), while the use in patients with reduced ejection fraction was unchanged (87.8% in 2006 compared to 88.6% in 2019, p for difference = 0.540).

### **Discussion**

In this study of temporal trends in risk factor control and use of secondary preventive medication in post-MI patients attending CR in Sweden 2006-2019, a considerable improvement in BP and LDL-C goal achievement and use of evidence-based pharmacotherapy was observed. On the other hand, changes in lifestyle were less encouraging, with the proportion of persistent smokers at one-year remaining unchanged, and prevalence of inadequate physical activity, central obesity, as well as diabetes increasing.

### *Blood pressure, lipids, and diabetes*

In the EUROASPIRE surveys patients aged 18-79 years with coronary artery disease (CAD) were interviewed and examined at approximately one year after a first or recurrent coronary

1  
2  
3 event (acute MI, unstable angina, or revascularization), to determine whether guidelines on CR  
4 were followed in clinical practice (5, 6). The III-V surveys were conducted over a period  
5 approximately matching our current study period (EUROASPIRE III 2006-2007, IV 2012-2013  
6 and V 2016-2017), the patients had similar initiating events, and the mean age and gender  
7 proportions were comparable to the SWEDEHEART population (Table S6), giving a good  
8 opportunity to compare our results to European data. In our study, the proportion of patients  
9 achieving the BP goal of  $<140/90$  mmHg increased from 65.2% to 86.0% between 2006 and  
10 2019, compared to an increase from 44.0% to 58.0% between EUROASPIRE III and V (Fig.  
11 6) (5, 6). As such, the proportion of patients achieving the BP goal was considerably higher  
12 (approximately 20%-points) during the whole period in SWEDEHEART. There was an even  
13 larger difference in the proportion of patients reaching the LDL-C target of  $<1.8$  mmol/L,  
14 increasing from 29.8% (2006) to 66.9% (2019) (37%-point improvement) in SWEDEHEART,  
15 compared to 20.9% vs 29.0% (8%-point improvement) between EUROASPIRE III and V (Fig.  
16 6). One reasonable explanation for the large difference in proportion of patients achieving  
17 treatment targets for BP and LDL-C in SWEDEHEART compared to EUROASPIRE could be  
18 that all patients in our study participated in CR to some extent, compared to 35-40% in the  
19 EUROASPIRE cohorts (18, 19). Participation in CR has been shown to increase adherence to  
20 secondary preventive medication and the proportion of patients reaching risk factor goals (20)  
21 as well as improving prognosis (2). Somewhat contradictory though, data from EUROASPIRE  
22 IV on risk factor target achievement showed no difference in the proportion of patients reaching  
23 targets for BP and LDL-C when comparing attenders and non-attenders in CR (19). Another  
24 possible explanation could be the higher proportion of patients being prescribed lipid lowering  
25 therapies in our study as compared to EUROASPIRE. Between 2015 and 2019 94-95% of  
26 patients were prescribed statins and/or ezetimibe, with the corresponding proportion in  
27 EUROASPIRE V (2016-2017) being 84%, out of which only 50% were prescribed high-



1  
2  
3 intensity lipid lowering drugs (5). In a study using Swedish registry data, the proportion of AMI  
4 patients receiving high-intensity statins post-MI during 2014-2016 was 91.3% (21). An  
5 additional explanation for the more pronounced improvement in target attainment in  
6 SWEDEHEART compared to EUROASPIRE, as well as a more pronounced use of potent lipid  
7 lowering therapy, might be the possibility of continuous self-audit of publicly available data for  
8 CR centres reporting to SWEDEHEART, as only a minority of the countries participating in  
9 EUROASPIRE had quality registries or audits comparable to SWEDEHEART. Among patients  
10 with CAD attending CR in Austria, where a well-functioning CR registry has been in use since  
11 2001 (7), 85% of patients between 2005 and 2015 reached the systolic BP goal of <140 mmHg  
12 (22). Similarly, according to annual reports from the Danish CR Database on patients with CAD  
13 attending CR, which started in 2015, the proportion of patients reaching the LDL-C goal of  
14 <1.8 mmol/L increased from 54% in 2015 to 63% in 2019 (23, 24), figures aligning well with  
15 our results for the same years. The joint observations from these three registries  
16 (SWEDEHEART, Austrian registry and Danish Registry) support the conclusion that  
17 benchmarking at a local and national level, and providing opportunities for open comparisons  
18 between centres, can positively impact quality of care (7, 25, 26).

19  
20  
21  
22  
23  
24  
25  
26  
27  
28  
29  
30  
31  
32  
33  
34  
35  
36  
37  
38  
39  
40 An interesting observation in our data was the increased difference in diabetes  
41 prevalence between hospitalization and one-year follow-up towards the end of the observed  
42 period. Also, median HbA1c values among patients with diabetes decreased. This possibly  
43 reflects heightened awareness and more structured routines for diagnosing diabetes in patients  
44 after an MI, with patients with milder forms of glucose disturbances being diagnosed. More  
45 patients being diagnosed should in the long-term positively impact prognosis (27, 28). The  
46 increase in fasting glucose values in the whole population, paralleled by increased prevalence  
47 of central obesity, further underlines the importance of vigilant screening and treatment of  
48 diabetes in the post-MI population.  
49  
50  
51  
52  
53  
54  
55  
56  
57  
58  
59  
60



### *Lifestyle*

Approximately 30% of patients were smokers at the time of the index event in both the SWEDEHEART registry and the EUROASPIRE surveys. The proportion of persistent smokers at one-year after the event, however, was generally higher in EUROASPIRE than in SWEDEHEART (Fig. S1) (5, 29). The fact that Sweden has the lowest proportion of daily smokers in Europe might partly explain the higher success rate for smoking cessation in our data. In contrary with the lack of difference in BP and LDL-C target achievement between CR attenders and non-attenders in EUROASPIRE, there was a substantial difference between attenders and non-attenders in smoking cessation rates, with 47% and 43% of CR attenders being persistent smokers in EUROASPIRE III (2006-2007) and IV (2011-2012), compared to 54% and 53% of the non-attenders (18, 19). The corresponding figures in SWEDEHEART (all patients defined as attenders) during the same years were 42% (2006-2007) and 45% (2011-2012). In both cohorts, however, there was no improvement in smoking cessation rates during the observed periods. The same can be seen in the British National Audits for CR (NACR) 2016-2019 (30) and the Danish CR Database 2015-2019 (24). Observational studies have shown that smoking cessation post-MI results in a 36% relative risk reduction in total mortality (31). The smoking cessation rates among CR attenders in the EUROASPIRE surveys and patients registered in SWEDEHEART, when compared to the considerably higher figures for non-attenders from EUROASPIRE, underline the importance of CR attendance for supporting tobacco abstinence. At the same time, it is discouraging to see no improvement in smoking cessation rates in any of the reviewed datasets.

The proportion of patients reporting insufficient physical activity at the one-year follow-up increased during the observed period. As different questionnaires for assessing physical activity have been used in the surveys and audits cited here, direct comparisons cannot

1  
2  
3 be made. Generally, though, in EUROASPIRE, the level of physical activity in all surveys was  
4 suboptimal and did not improve between surveys (5, 6), while the proportion of patients  
5 classified as physically active increased somewhat in the NACR reports 2016-2019 (30).  
6  
7  
8  
9

10 While the prevalence of overweight/obesity at the time of the MI increased during  
11 the study period, the proportion of overweight/obese patients at the one-year follow-up visit  
12 remained unchanged (72-73%). This might partly be explained by a slight weight gain between  
13 hospitalization and one-year follow-up during the first half of the observed period, while a  
14 minimal weight loss was observed during the latter half. The clinical relevance of this  
15 observation is, however, uncertain. No change in the proportion of obese patients was observed  
16 in NACR 2016-2019 (30) or the EUROASPIRE surveys, where just over 80% were overweight  
17 or obese (5, 6) (Fig. S1). The prevalence of central obesity was similar in our study and in  
18 EUROASPIRE and increased to the same extent (by approximately 10%-points) during the  
19 observed period (5, 6).  
20  
21  
22  
23  
24  
25  
26  
27  
28  
29  
30  
31  
32

33 In a recently published paper based on data from EUROASPIRE IV and V, poor  
34 adherence to lifestyle changes were addressed (20). The authors concluded that while adherence  
35 to lifestyle advice was better among patients who had attended CR, an increased focus on  
36 behavioural change within CR to address unhealthy lifestyles is strongly needed. With all  
37 patients in our cohort having participated in CR to some extent, data on lifestyle being  
38 monitored and openly compared annually in the SWEDEHEART registry, and no visible  
39 change for the better seen for more than a decade, our results strongly support this conclusion.  
40  
41  
42  
43  
44  
45  
46  
47  
48  
49  
50

### 51 *Cardioprotective medication*

52 According to our study the use of lipid lowering drugs was high during the whole period. More  
53 than 90% of the patients were prescribed statins at the one-year follow-up visit throughout the  
54 observed period and ezetimibe use increased rapidly after 2015, reaching 29.8% in 2019. In  
55  
56  
57  
58  
59  
60

1  
2  
3 2015-2109 more than 94% of all patients were prescribed statins and/or ezetimibe. Meanwhile,  
4 the use of lipid lowering therapy including statins, ezetimibe, fibrates, bile acid sequestrants,  
5 and nicotinic acid, increased from approximately 80% of patients in EUROASPIRE III to 84%  
6 in EUROASPIRE V (5, 29, 32) (Fig. S2). In the CR attendance analyses from the  
7 EUROASPIRE III and IV surveys, compared to non-attenders, the proportion of CR attenders  
8 on lipid lowering therapy was considerably higher, or 83% vs 78% (EAIII) and 88% vs 85%  
9 (EAIIV), respectively (18, 19). Data on the use of cardioprotective medication from the Austrian  
10 registry or the British National Audit for CR (NACR) has to our knowledge not been published.  
11 In annual reports from the Danish CR database, during 2016-2019, between 93-96% of CAD  
12 patients were prescribed statins at the end of CR (24). According to our study the use of  
13 ACEi/ARB increased from 64.9% in 2006 to 79.5% in 2019 while patients prescribed  
14 ACEi/ARB in EUROASPIRE III was 71% and 75% in EUROASPIRE V (Fig. S2) (5, 29, 32).  
15 In the EUROASPIRE III and IV, the use of ACEi/ARB and BP-lowering medication was  
16 significantly higher in CR attenders than in non-attenders, although the difference was not as  
17 large as for lipid lowering treatment (18, 19). While conclusions about the influence of auditing  
18 on cardioprotective medication prescription in Sweden are hard to draw, generally it can be  
19 concluded that the use of cardioprotective medication in our and other surveys has been high  
20 and has increased both in Sweden and Europe in general during the observed period.  
21  
22  
23  
24  
25  
26  
27  
28  
29  
30  
31  
32  
33  
34  
35  
36  
37  
38  
39  
40  
41  
42  
43  
44  
45  
46  
47

### 48 *Strengths and limitations*

49  
50 The major strength of this study is the broad representability and national  
51 coverage of data, with more than 75% of all MI patients under the age of 75 being registered in  
52 SWEDEHEART and attending a one-year CR follow-up visit since 2016. At the same time, a  
53 major limitation is the lack of data describing MI patients not attending CR and on those  $\geq 75$   
54 years of age and results cannot be generalized to these groups. Even though the mean age in  
55  
56  
57  
58  
59  
60

1  
2  
3 our data was similar to EUROASPIRE, the age range differed somewhat (our data 18-74 years  
4 vs 18-79 years in EUROASPIRE), which might have led to a slight overestimation of the  
5  
6 results. Also, the coverage on center-level during the first years was low and representability  
7  
8 therefore not as extensive. Comparing our data with other survey and audit data is limited by  
9  
10 differences in patient selections, different rates of CR participation, time of follow-up,  
11  
12 differences in measurement methods (i.e., questionnaires, self-report), and definitions (i.e.,  
13  
14 physical inactivity).  
15  
16  
17  
18  
19  
20

### 21 *Conclusion*

22  
23 Between 2006-2019, an increasing proportion of patients in Sweden reached secondary  
24 preventive goals for BP and LDL-C one year after an MI. The proportion of patients treated  
25 with evidence-based secondary preventive medication also increased. Both levels of BP and  
26  
27 LDL-C, as well as use of pharmacological treatment were comparable with data from other  
28  
29 similar European quality registries and national level audits used for benchmarking. The trends  
30  
31 were more favourable than those observed in EUROASPIRE, data from which represents  
32  
33 several European countries where audits were not widely available. The results may indicate  
34  
35 that national quality registries can contribute to improving outcomes in CR and add evidence  
36  
37 to the importance of auditing and benchmarking as means to improve quality of care. Less  
38  
39 encouraging, no changes were seen the proportion of current smokers at the time of the MI who  
40  
41 are abstinent at one-year, more patients reported inadequate levels of physical activity, and the  
42  
43 proportion of patients with central obesity and diabetes increased, as was observed in  
44  
45 EUROASPIRE. These observations bare witness of a large unmet need to prioritize patient  
46  
47 lifestyle support after an MI, which should be improved to provide patients with adequate risk  
48  
49 reduction.  
50  
51  
52  
53  
54  
55  
56  
57  
58  
59  
60

## Acknowledgements

None.

## Statements

### *Contributorship*

M.L., E.H., and M.B. contributed to the conception and design of the work. A.N., B.L., K.H. and T.J. offered medical expertise and guidance. N.H. conducted all data analysis. M.L. drafted the manuscript. All other authors critically revised the manuscript. All approved the final version of the manuscript.

### *Funding statement*

This research received no specific grant from any funding agency in the public, commercial or non-for-profit sectors.

### *Competing of Interests*

All authors except NH are or have been engaged in the SWEDHEART registry. Otherwise, the authors have no conflicts of interest to declare.

### *Ethics approval*

The need for signed informed consent by patients for inclusion in Swedish quality registries has collectively been waived in Sweden. Upon hospital admission, MI patients are informed verbally and in writing by a nurse or physician about data being collected and entered in the registry. However, all patients have the right to deny registration and the right upon request to be removed from the registry at any time. Opt-out is extremely rare, counting less than ten cases

per year. The study complies with the Declaration of Helsinki and was approved by The Swedish Ethical Review Authority (registration number: 2019-04277).

### *Data sharing*

The data used in this study is based on the SWEDEHEART registry. Access to data from the registry needs to be applied for and third-party data usage is not allowed, irrespective of whether the data contain potentially identifying or sensitive data or not. Instead, given ethical study approval from the Swedish Ethical Review Authority, access to SWEDEHEART data supporting the present findings can be applied for from the Uppsala Clinical Research Center (UCR) in Sweden. Further information can be found on the UCR [www.ucr.uu.se/en/](http://www.ucr.uu.se/en/) and Swedish Ethical Review Authority [etikprovningsmyndigheten.se/](http://etikprovningsmyndigheten.se/) websites.

One co-author (NH) had primary responsibility for the study data and takes responsibility for its integrity and the data analysis. Analytical methods and other study material are available upon reasonable request to the corresponding author.

### **Figure legends**

**Fig. 1.** Patient characteristics as registered during MI hospitalization for patients attending the one-year follow-up visit within CR in Sweden 2006-2019. <sup>a</sup>BMI  $\geq 25$  kg/m<sup>2</sup>; <sup>b</sup>prior MI, PCI, CABG, or stroke; <sup>c</sup>ACE inhibitors/ARB, beta blockers, diuretics and/or calcium channel blockers; <sup>d</sup>statins and/or ezetimibe. ACEi, angiotensin converting enzyme inhibitor; ARB, angiotensin receptor blocker; ASCVD, atherosclerotic cardiovascular disease (MI, PCI, CABG or stroke); BMI, body mass index; CABG, coronary artery bypass grafting; MI, myocardial infarction; N, number; PCI, percutaneous coronary intervention.

1  
2  
3 **Fig. 2.** Proportion of patients achieving targets for BP and LDL-C at the one-year follow-up  
4 visit 2006-2019. The p-value for trend from 2006 to 2019 was <0.0001 for both BP and LDL-  
5 C. BP, blood pressure; LDL-C, low-density lipoprotein cholesterol.  
6  
7  
8

9  
10  
11  
12 **Fig. 3.** Mean delta values between hospitalization and the one-year CR follow-up visit for  
13 systolic and diastolic BP (upper panel) and LDL-C (lower panel) by year 2006-2019. The p-  
14 value for the trend from 2006 to 2019 was <0.0001 for all. DBP, diastolic blood pressure; LDL-  
15 C, low-density lipoprotein cholesterol; SBP, systolic blood pressure.  
16  
17  
18  
19

20  
21  
22  
23 **Fig. 4.** Prevalence of persistent smoking (proportion of active smokers at the time of MI who  
24 were still smoking), inadequate physical activity, overweight/obesity, and diabetes at one-year  
25 post-MI. <sup>a</sup>BMI  $\geq 25$  kg/m<sup>2</sup>; <sup>b</sup>waist circumference  $\geq 102$  cm for men and  $\geq 88$  cm for women;  
26  
27  
28  
29  
30  
31  
32  
33  
34  
35  
36  
37  
38  
39  
40  
41  
42  
43  
44  
45  
46  
47  
48  
49  
50  
51  
52  
53  
54  
55  
56  
57  
58  
59  
60  
<sup>c</sup>physically active  $\geq 30$  minutes for less than 5 days a week. BMI, body mass index; MI,  
myocardial infarction.

61  
62  
63  
64  
65  
66  
67  
68  
69  
70  
71  
72  
73  
74  
75  
76  
77  
78  
79  
80  
81  
82  
83  
84  
85  
86  
87  
88  
89  
90  
91  
92  
93  
94  
95  
96  
97  
98  
99  
100  
**Fig. 5.** Proportion of patients at one-year follow-up for each year 2006-2019 treated with statins,  
ezetimibe, ACEi or ARB, beta blockers, antiplatelet (acetylsalicylic acid or P2Y<sub>12</sub>-receptor  
antagonists) or anticoagulant therapy (warfarin or direct oral anticoagulants). ACEi,  
angiotensin converting enzyme inhibitor; ARB, angiotensin receptor blocker.

101  
102  
103  
104  
105  
106  
107  
108  
109  
110  
111  
112  
113  
114  
115  
116  
117  
118  
119  
120  
121  
122  
123  
124  
125  
126  
127  
128  
129  
130  
131  
132  
133  
134  
135  
136  
137  
138  
139  
140  
141  
142  
143  
144  
145  
146  
147  
148  
149  
150  
151  
152  
153  
154  
155  
156  
157  
158  
159  
160  
**Fig. 6.** Management of BP and LDL in SWEDEHEART (left panel) and EUROASPIRE (right  
panel) (5, 6). \*Different definitions of BP treatment goals for patients with diabetes were  
adapted in the EUROASPIRE surveys (III <130/80 mmHg, IV 140/80 mmHg, V <140/85  
mmHg), while the definition <140/90 mmHg was adapted for patients with and without diabetes  
in SWEDEHEART. BP, blood pressure; LDL-C, low-density lipoprotein cholesterol.

## References

1. Björck L, Rosengren A, Bennett K, Lappas G, Capewell S. Modelling the decreasing coronary heart disease mortality in Sweden between 1986 and 2002. *Eur Heart J*. 2009;30(9):1046-56.
2. Salzwedel A, Jensen K, Rauch B, et al. Effectiveness of comprehensive cardiac rehabilitation in coronary artery disease patients treated according to contemporary evidence based medicine: Update of the Cardiac Rehabilitation Outcome Study (CROS-II). *Eur J Prev Cardiol*. 2020;27(16):1756-74.
3. Visseren FLJ, Mach F, Smulders YM, et al. 2021 ESC Guidelines on cardiovascular disease prevention in clinical practice. *Eur Heart J*. 2021;42(34):3227-337.
4. Ambrosetti M, Abreu A, Corra U, et al. Secondary prevention through comprehensive cardiovascular rehabilitation: From knowledge to implementation. 2020 update. A position paper from the Secondary Prevention and Rehabilitation Section of the European Association of Preventive Cardiology. *Eur J Prev Cardiol*. 2020:2047487320913379.
5. Kotseva K, De Backer G, De Bacquer D, et al. Lifestyle and impact on cardiovascular risk factor control in coronary patients across 27 countries: Results from the European Society of Cardiology ESC-EORP EUROASPIRE V registry. *Eur J Prev Cardiol*. 2019;26(8):824-35.
6. Kotseva K, De Bacquer D, Jennings C, et al. Time Trends in Lifestyle, Risk Factor Control, and Use of Evidence-Based Medications in Patients With Coronary Heart Disease in Europe: Results From 3 EUROASPIRE Surveys, 1999-2013. *Glob Heart*. 2017;12(4):315-22 e3.
7. Poffley A, Thomas E, Grace SL, et al. A systematic review of cardiac rehabilitation registries. *Eur J Prev Cardiol*. 2017;24(15):1596-609.



- 1  
2  
3 8. Aktaa S, Batra G, Wallentin L, et al. European Society of Cardiology  
4 methodology for the development of quality indicators for the quantification of cardiovascular  
5 care and outcomes. *Eur Heart J Qual Care Clin Outcomes*. 2022;8(1):4-13.  
6  
7
- 8 9. Aktaa S, Gencer B, Arbelo E, et al. European Society of Cardiology Quality  
9 Indicators for Cardiovascular Disease Prevention: developed by the Working Group for  
10 Cardiovascular Disease Prevention Quality Indicators in collaboration with the European  
11 Association for Preventive Cardiology of the European Society of Cardiology. *Eur J Prev  
12 Cardiol*. 2022;29(7):1060-71.  
13  
14
- 15 10. Thomas RJ, Balady G, Banka G, et al. 2018 ACC/AHA Clinical Performance and  
16 Quality Measures for Cardiac Rehabilitation: A Report of the American College of  
17 Cardiology/American Heart Association Task Force on Performance Measures. *J Am Coll  
18 Cardiol*. 2018;71(16):1814-37.  
19  
20
- 21 11. British Association for Cardiovascular Prevention and Rehabilitation. The  
22 BACPR standards and core components for cardiovascular disease prevention and  
23 rehabilitation (3rd edition). London, England; 2017.  
24  
25
- 26 12. Jernberg T, Attebring MF, Hambraeus K, et al. The Swedish Web-system for  
27 enhancement and development of evidence-based care in heart disease evaluated according to  
28 recommended therapies (SWEDEHEART). *Heart*. 2010;96(20):1617-21.  
29  
30
- 31 13. Back M, Leosdottir M, Hagstrom E, et al. The SWEDEHEART secondary  
32 prevention and cardiac rehabilitation registry (SWEDEHEART CR registry). *Eur Heart J Qual  
33 Care Clin Outcomes*. 2021;7(5):431-7.  
34  
35
- 36 14. Hambraeus K, Tyden P, Lindahl B. Time trends and gender differences in  
37 prevention guideline adherence and outcome after myocardial infarction: Data from the  
38 SWEDEHEART registry. *Eur J Prev Cardiol*. 2016;23(4):340-8.  
39  
40  
41  
42  
43  
44  
45  
46  
47  
48  
49  
50  
51  
52  
53  
54  
55  
56  
57  
58  
59  
60

- 1  
2  
3 15. Jernberg T, Boberg B, Back M, et al. SWEDHEART Annual Report 2019.  
4  
5 Uppsala, Sweden: Uppsala Clinical Research Center; 2019.  
6
- 7  
8 16. Vasko P, Alfredsson J, Back M, et al. SWEDHEART Annual report 2020.  
9  
10 Annual report. Uppsala, Sweden: Uppsala Clinical Research Center (UCR); 2021.  
11
- 12  
13 17. Friedewald WT, Levy RI, Fredrickson DS. Estimation of the concentration of  
14  
15 low-density lipoprotein cholesterol in plasma, without use of the preparative ultracentrifuge.  
16  
17 *Clin Chem.* 1972;18(6):499-502.  
18
- 19  
20 18. Kotseva K, Wood D, De Backer G, et al. Use and effects of cardiac rehabilitation  
21  
22 in patients with coronary heart disease: results from the EUROASPIRE III survey. *Eur J Prev*  
23  
24 *Cardiol.* 2013;20(5):817-26.  
25
- 26  
27 19. Kotseva K, Wood D, De Bacquer D, et al. Determinants of participation and risk  
28  
29 factor control according to attendance in cardiac rehabilitation programmes in coronary patients  
30  
31 in Europe: EUROASPIRE IV survey. *Eur J Prev Cardiol.* 2018;25(12):1242-51.  
32
- 33  
34 20. De Bacquer D, Astin F, Kotseva K, et al. Poor adherence to lifestyle  
35  
36 recommendations in patients with coronary heart disease: results from the EUROASPIRE  
37  
38 surveys. *Eur J Prev Cardiol.* 2021;29(2):383-395.  
39
- 40  
41 21. Svensson MK, Sorio Vilela F, Leosdottir M, et al. Effects of lipid-lowering  
42  
43 treatment intensity and adherence on cardiovascular outcomes in patients with a recent  
44  
45 myocardial infarction: a Swedish register-based study. *Ups J Med Sci.* 2022;127.  
46
- 47  
48 22. Reich B, Benzer W, Harpf H, et al. Efficacy of extended, comprehensive  
49  
50 outpatient cardiac rehabilitation on cardiovascular risk factors: A nationwide registry. *Eur J*  
51  
52 *Prev Cardiol.* 2020;27(10):1026-33.  
53
- 54  
55 23. Zwisler AD, Rossau HK, Nakano A, et al. The Danish Cardiac Rehabilitation  
56  
57 Database. *Clin Epidemiol.* 2016;8:451-6.  
58
- 59  
60 24. Thomsen KK. Danish Cardiac Rehabilitation Registry Annual Report. 2019.

- 1  
2  
3 25. Paton JY, Ranmal R, Dudley J, and R. C. S. Committee. Clinical audit: still an  
4 important tool for improving healthcare. *Arch Dis Child Educ Pract Ed.* 2015;100(2):83-8.  
5  
6  
7 26. Abreu A, Frederix I, Dendale P, et al. Standardization and quality improvement  
8 of secondary prevention through cardiovascular rehabilitation programmes in Europe: The  
9 avenue towards EAPC accreditation programme: A position statement of the Secondary  
10 Prevention and Rehabilitation Section of the European Association of Preventive Cardiology  
11 (EAPC). *Eur J Prev Cardiol.* 2020.  
12  
13  
14  
15  
16  
17  
18  
19 27. Feldman AL, Griffin SJ, Fharm E, et al. Screening for type 2 diabetes: do screen-  
20 detected cases fare better? *Diabetologia.* 2017;60(11):2200-9.  
21  
22  
23  
24 28. Ogmundsdottir Michelsen H, Sjolin I, Schlyter M, et al. Cardiac rehabilitation  
25 after acute myocardial infarction in Sweden - evaluation of programme characteristics and  
26 adherence to European guidelines: The Perfect Cardiac Rehabilitation (Perfect-CR) study. *Eur*  
27 *J Prev Cardiol.* 2020;27(1):18-27.  
28  
29  
30  
31  
32  
33 29. Kotseva K, Wood D, De Backer G, et al. EUROASPIRE III: a survey on the  
34 lifestyle, risk factors and use of cardioprotective drug therapies in coronary patients from 22  
35 European countries. *Eur J Cardiovasc Prev Rehabil.* 2009;16(2):121-37.  
36  
37  
38  
39  
40 30. Doherty P. National Audit of Cardiac Rehabilitation - Annual Statistical Reports  
41 York, U.K.; 2016-2019.  
42  
43  
44 31. Critchley JA, Capewell S. Mortality risk reduction associated with smoking  
45 cessation in patients with coronary heart disease: a systematic review. *JAMA.* 2003;290(1):86-  
46 97.  
47  
48  
49  
50  
51 32. Kotseva K, Wood D, De Bacquer D, et al. EUROASPIRE IV: A European Society  
52 of Cardiology survey on the lifestyle, risk factor and therapeutic management of coronary  
53 patients from 24 European countries. *Eur J Prev Cardiol.* 2016;23(6):636-48.  
54  
55  
56  
57  
58  
59  
60

|   |      |      |      |      |      |      |      |      |      |      |      |      |      |      |
|---|------|------|------|------|------|------|------|------|------|------|------|------|------|------|
| N | 2502 | 3942 | 5223 | 4948 | 4720 | 5368 | 5976 | 6530 | 6432 | 6831 | 7121 | 7073 | 7269 | 7428 |
|---|------|------|------|------|------|------|------|------|------|------|------|------|------|------|

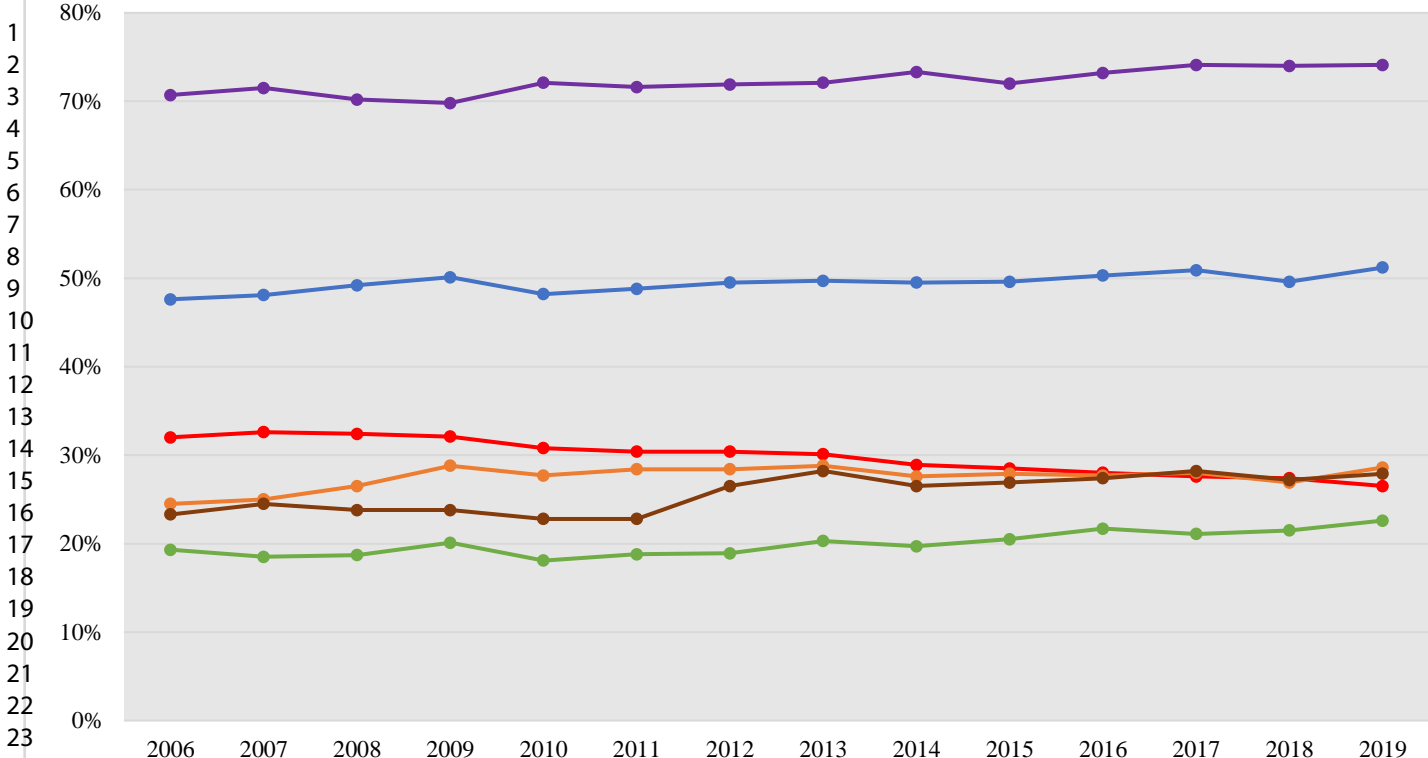

● Overweight and obesity<sup>a</sup>
● Use of antihypertensive drugs<sup>c</sup>  
● Smoking
 ● Use of lipid lowering drugs<sup>d</sup>  
● Prior ASCVD<sup>b</sup>
● Diabetes

1  
2  
3  
4  
5  
6  
7  
8  
9  
10  
11  
12  
13  
14  
15  
16  
17  
18  
19  
20  
21  
22  
23  
24  
25



For peer review only - <http://bmjopen.bmj.com/site/about/guidelines.xhtml>

● BP <140/90 mmHg

● LDL-C <1.8 mmol/L

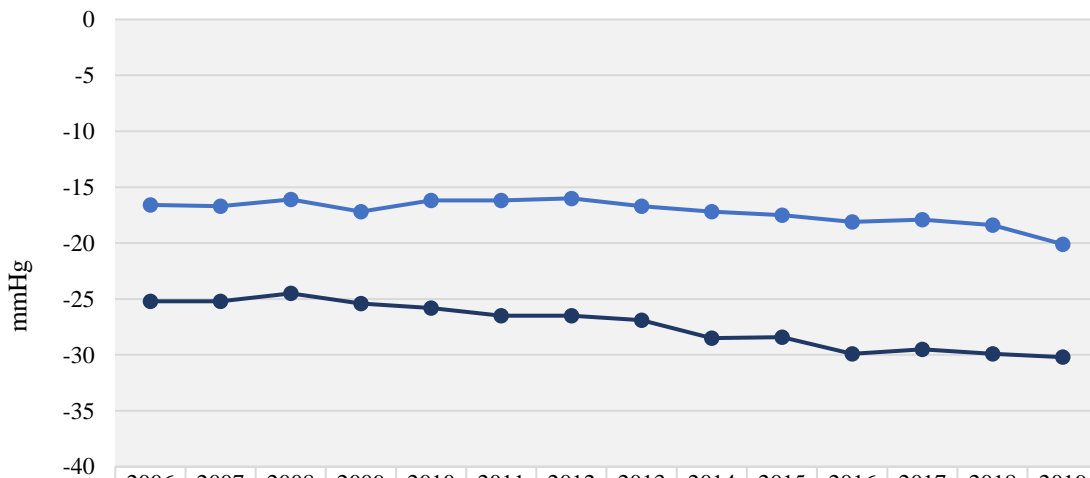

|           | 2006  | 2007  | 2008  | 2009  | 2010  | 2011  | 2012  | 2013  | 2014  | 2015  | 2016  | 2017  | 2018  | 2019  |
|-----------|-------|-------|-------|-------|-------|-------|-------|-------|-------|-------|-------|-------|-------|-------|
| Delta DBP | -16.6 | -16.7 | -16.1 | -17.2 | -16.2 | -16.2 | -16.0 | -16.7 | -17.2 | -17.5 | -18.1 | -17.9 | -18.4 | -20.1 |
| Delta SBP | -25.2 | -25.2 | -24.5 | -25.4 | -25.8 | -26.5 | -26.5 | -26.9 | -28.5 | -28.4 | -29.9 | -29.5 | -29.9 | -30.2 |

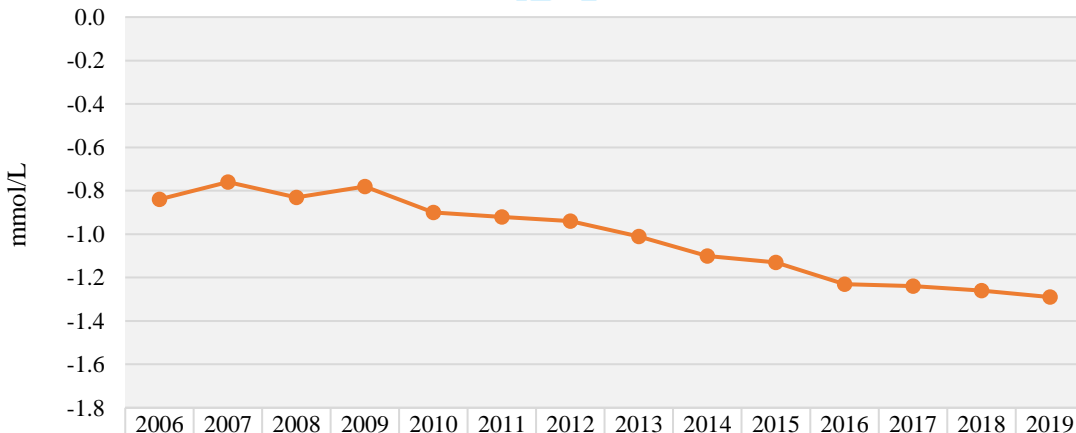

|             | 2006  | 2007  | 2008  | 2009  | 2010 | 2011  | 2012  | 2013  | 2014 | 2015  | 2016  | 2017  | 2018  | 2019  |
|-------------|-------|-------|-------|-------|------|-------|-------|-------|------|-------|-------|-------|-------|-------|
| Delta LDL-C | -0.84 | -0.76 | -0.83 | -0.78 | -0.9 | -0.92 | -0.94 | -1.01 | -1.1 | -1.13 | -1.23 | -1.24 | -1.26 | -1.29 |



Overweight and obesity<sup>a</sup> Central obesity<sup>b</sup>  
Persistent smoking Inadequate physical activity<sup>c</sup>  
Diabetes

For peer review only - <http://bmjopen.bmj.com/site/about/guidelines.xhtml>



—●— Statin
 —●— Ezetimibe  
—●— ACE/ARB
 —●— Beta blockers  
—●— Antiplatelet therapy
 —●— Anticoagulant therapy



1  
2  
3  
4  
5  
6  
7  
8  
9  
10  
11  
12  
13  
14  
15  
16  
17  
18  
19  
20

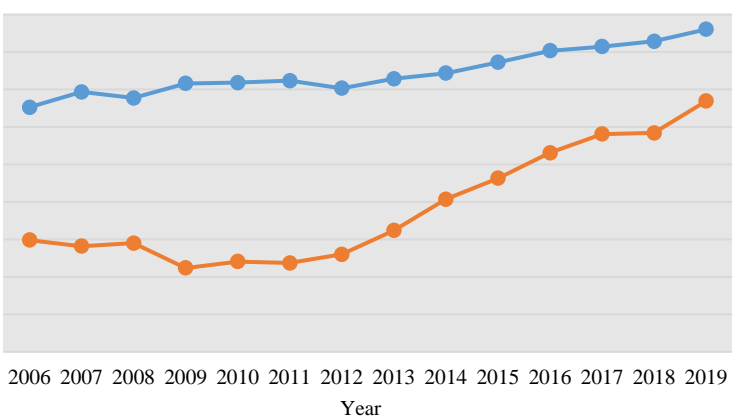

### SWEDHEART

For peer review only - <http://bmjopen.bmj.com/site/about/guidelines.xhtml>

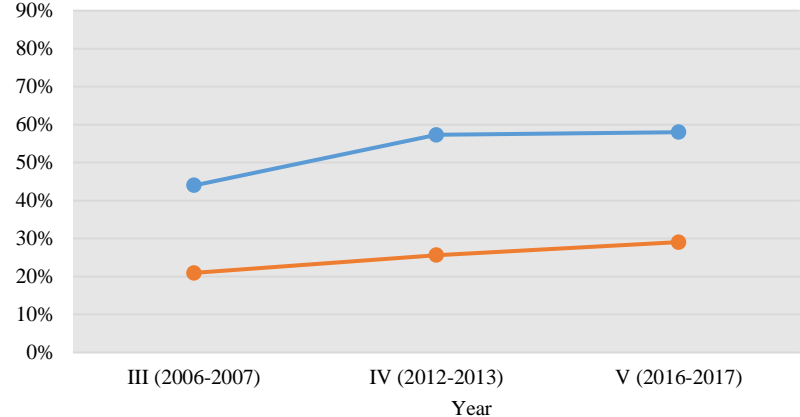

### EUROASPIRE

## Supplementary material

Temporal trends in cardiovascular risk factors, lifestyle, and secondary preventive medication  
for patients with myocardial infarction attending cardiac rehabilitation in Sweden 2006-2019:  
a registry-based cohort study

**Table S1.** Patient characteristics during hospitalization (continuous variables) by year. Data are presented as median values (q1, q3).

1

| Year                       | 2006           | 2007           | 2008           | 2009           | 2010           | 2011           | 2012           | 2013           | 2014           | 2015           | 2016           | 2017           | 2018           | 2019           | p for trend |
|----------------------------|----------------|----------------|----------------|----------------|----------------|----------------|----------------|----------------|----------------|----------------|----------------|----------------|----------------|----------------|-------------|
| N                          | 2502           | 3942           | 5223           | 4948           | 4720           | 5368           | 5976           | 6530           | 6432           | 6831           | 7121           | 7073           | 7269           | 7428           |             |
| Age (years)                | 63 (57, 69)    | 63 (57, 69)    | 63 (57, 69)    | 63 (57, 69)    | 63 (57, 69)    | 64 (57, 69)    | 64 (57, 69)    | 64 (57, 69)    | 64 (57, 69)    | 64 (57, 69)    | 65 (57, 70)    | 64 (57, 70)    | 65 (58, 70)    | 65 (58, 70)    | <0.0001     |
| N missing                  | 0              | 0              | 0              | 0              | 0              | 0              | 0              | 0              | 0              | 0              | 0              | 0              | 0              | 0              |             |
| Systolic BP (mmHg)         | 150 (130, 170) | 147 (130, 165) | 145 (130, 165) | 146 (130, 165) | 147 (130, 165) | 149 (130, 168) | 150 (130, 170) | 150 (130, 170) | 150 (131, 170) | 150 (132, 170) | 150 (133, 170) | 150 (132, 170) | 150 (133, 170) | 150 (130, 169) | <0.0001     |
| N missing                  | 293            | 406            | 479            | 456            | 308            | 7              | 18             | 36             | 48             | 51             | 44             | 2              | 3              | 4              |             |
| Diastolic BP (mmHg)        | 85 (74, 100)   | 85 (75, 98)    | 85 (75, 97)    | 85 (75, 97)    | 85 (75, 96)    | 85 (75, 98)    | 87 (76, 100)   | 88 (77, 100)   | 88 (78, 100)   | 89 (79, 100)   | 89 (78, 99)    | 89 (79, 100)   | 90 (79, 100)   | 89 (79, 100)   | <0.0001     |
| N missing                  | 330            | 471            | 529            | 509            | 410            | 130            | 176            | 213            | 290            | 299            | 261            | 227            | 352            | 454            |             |
| Total cholesterol (mmol/L) | 5.0 (4.3, 5.8) | 5.0 (4.2, 5.8) | 4.9 (4.2, 5.7) | 5.0 (4.2, 5.8) | 5.1 (4.3, 5.9) | 5.1 (4.3, 6.0) | 5.1 (4.3, 6.0) | 5.1 (4.3, 6.0) | 5.0 (4.2, 5.9) | 5.0 (4.2, 5.8) | 5.0 (4.2, 5.9) | 5.0 (4.1, 5.8) | 5.0 (4.1, 5.9) | 4.9 (4.0, 5.7) | <0.0001     |
| N missing                  | 329            | 554            | 788            | 833            | 835            | 1108           | 1185           | 1280           | 1204           | 1088           | 947            | 835            | 686            | 727            |             |
| LDL-C (mmol/L)             | 3.0 (2.3, 3.7) | 3.0 (2.3, 3.7) | 3.0 (2.3, 3.7) | 3.1 (2.3, 3.8) | 3.2 (2.5, 3.9) | 3.2 (2.5, 3.9) | 3.2 (2.5, 4.0) | 3.2 (2.4, 3.9) | 3.1 (2.3, 3.9) | 3.1 (2.3, 3.8) | 3.1 (2.3, 3.9) | 3.0 (2.2, 3.8) | 3.0 (2.2, 3.8) | 3.0 (2.2, 3.8) | <0.0001     |
| N missing                  | 471            | 844            | 1008           | 972            | 1001           | 1272           | 1420           | 1678           | 1395           | 1234           | 1028           | 927            | 629            | 663            |             |
| HDL-C (mmol/L)             | 1.2 (1.0, 1.4) | 1.2 (1.0, 1.4) | 1.1 (0.9, 1.4) | 1.1 (0.9, 1.3) | 1.1 (0.9, 1.3) | 1.1 (0.9, 1.4) | 1.1 (0.9, 1.4) | 1.1 (1.0, 1.4) | 1.1 (1.0, 1.4) | 1.1 (0.9, 1.4) | 1.1 (0.9, 1.4) | 1.2 (1.0, 1.4) | 1.2 (0.9, 1.4) | 1.1 (0.9, 1.4) | 0.003       |
| N missing                  | 455            | 821            | 898            | 886            | 941            | 1214           | 1330           | 1519           | 1374           | 1188           | 987            | 901            | 746            | 766            |             |

| Year                      | 2006                 | 2007                 | 2008                 | 2009                 | 2010                 | 2011                 | 2012                 | 2013                 | 2014                 | 2015                 | 2016                 | 2017                 | 2018                 | 2019                 | p for trend |
|---------------------------|----------------------|----------------------|----------------------|----------------------|----------------------|----------------------|----------------------|----------------------|----------------------|----------------------|----------------------|----------------------|----------------------|----------------------|-------------|
| N                         | 2502                 | 3942                 | 5223                 | 4948                 | 4720                 | 5368                 | 5976                 | 6530                 | 6432                 | 6831                 | 7121                 | 7073                 | 7269                 | 7428                 |             |
| Triglycerides<br>(mmol/L) | 1.5 (1.1,<br>2.2)    | 1.5 (1.1,<br>2.1)    | 1.5 (1.1,<br>2.1)    | 1.5 (1.1,<br>2.1)    | 1.4 (1.1,<br>2.0)    | 1.4 (1.0,<br>2.0)    | 1.4 (1.0,<br>1.9)    | 1.4 (1.0,<br>1.9)    | 1.4 (1.0,<br>2.0)    | <0.0001     |
| N missing                 | 391                  | 769                  | 897                  | 901                  | 923                  | 1170                 | 1318                 | 1599                 | 1500                 | 1601                 | 1488                 | 1460                 | 1481                 | 1472                 |             |
| F-glucose<br>(mmol/L)     | 6.7 (5.6,<br>8.4)    | 6.6 (5.7,<br>8.3)    | 6.7 (5.7,<br>8.4)    | 6.8 (5.7,<br>8.5)    | 6.7 (5.8,<br>8.3)    | 6.8 (5.8,<br>8.5)    | 6.7 (5.8,<br>8.4)    | 6.7 (5.9,<br>8.5)    | 6.8 (5.9,<br>8.5)    | 6.8 (5.9,<br>8.6)    | 6.9 (5.9,<br>8.7)    | 6.9 (5.9,<br>8.7)    | 6.9 (5.9,<br>8.6)    | 7.0 (6.0,<br>8.8)    | <0.0001     |
| N missing                 | 213                  | 332                  | 452                  | 363                  | 324                  | 727                  | 1034                 | 1147                 | 1014                 | 767                  | 762                  | 643                  | 812                  | 1011                 |             |
| HbA1c<br>(mmol/mol)*      | N/A                  | N/A                  | N/A                  | N/A                  | N/A                  | 59.0 (50.0,<br>71.0) | 59.0 (48.0,<br>73.0) | 58.0 (50.0,<br>73.0) | 61.0 (50.0,<br>74.0) | 60.0 (50.0,<br>77.0) | 59.0 (48.0,<br>74.0) | 56.0 (48.0,<br>69.0) | 56.0 (48.0,<br>72.0) | 57.0 (48.0,<br>69.0) | 0.012       |
| N missing                 | 484                  | 730                  | 977                  | 996                  | 852                  | 776                  | 872                  | 1059                 | 949                  | 1071                 | 1113                 | 980                  | 973                  | 1012                 |             |
| BMI (kg/m <sup>2</sup> )  | 26.7 (24.6,<br>29.4) | 26.9 (24.7,<br>29.7) | 26.9 (24.5,<br>29.7) | 26.9 (24.5,<br>29.8) | 27.0 (24.7,<br>29.9) | 27.1 (24.7,<br>30.0) | 27.2 (24.7,<br>30.1) | 27.2 (24.7,<br>30.1) | 27.2 (24.8,<br>30.1) | 27.2 (24.7,<br>30.1) | 27.4 (24.8,<br>30.5) | 27.4 (24.9,<br>30.4) | 27.5 (24.9,<br>30.5) | 27.5 (24.9,<br>30.7) | <0.0001     |
| N missing                 | 793                  | 955                  | 898                  | 861                  | 862                  | 316                  | 263                  | 167                  | 183                  | 166                  | 205                  | 169                  | 207                  | 234                  |             |

\*Patients with diabetes only. BMI, body mass index; BP, blood pressure; F, fasting; HbA1c, hemoglobin A1c; HDL-C, high-density lipoprotein cholesterol; LDL-C, low-density lipoprotein cholesterol; N, number; N/A, no data available; q1, lower quartile; q3, upper quartile.

**Table S2.** Patient characteristics during hospitalization (categorical variables) by year. Data are presented as numbers (N) and proportions (%). <sup>3</sup>

| Year                                                | 2006  | 2007  | 2008  | 2009  | 2010  | 2011  | 2012  | 2013  | 2014  | 2015  | 2016  | 2017  | 2018  | 2019  | p for trend |
|-----------------------------------------------------|-------|-------|-------|-------|-------|-------|-------|-------|-------|-------|-------|-------|-------|-------|-------------|
| N                                                   | 2502  | 3942  | 5223  | 4948  | 4720  | 5368  | 5976  | 6530  | 6432  | 6831  | 7121  | 7073  | 7269  | 7428  |             |
| Male sex                                            | 73.5% | 74.4% | 73.1% | 73.7% | 74.1% | 74.5% | 74.6% | 74.1% | 76.2% | 75.3% | 74.5% | 76.2% | 75.1% | 75.2% | <0.0001     |
| N missing                                           | 0     | 0     | 0     | 0     | 0     | 0     | 0     | 0     | 0     | 0     | 0     | 0     | 0     | 0     |             |
| Current smoking                                     | 32.0% | 32.6% | 32.4% | 32.1% | 30.8% | 30.4% | 30.4% | 30.1% | 28.9% | 28.5% | 28.0% | 27.6% | 27.4% | 26.5% | <0.0001     |
| N missing                                           | 99    | 150   | 161   | 171   | 130   | 215   | 128   | 143   | 124   | 132   | 145   | 145   | 172   | 177   |             |
| Overweight/obese (BMI $\geq$ 25 kg/m <sup>2</sup> ) | 70.7% | 71.5% | 70.2% | 69.8% | 72.1% | 71.6% | 71.9% | 72.1% | 73.3% | 72.0% | 73.2% | 74.1% | 74.0% | 74.1% | <0.0001     |
| N missing                                           | 793   | 955   | 898   | 861   | 862   | 316   | 263   | 167   | 183   | 166   | 205   | 169   | 207   | 234   |             |
| Obese (BMI $\geq$ 30 kg/m <sup>2</sup> )            | 22.8% | 23.8% | 23.4% | 23.9% | 24.3% | 25.4% | 26.0% | 25.9% | 26.0% | 26.4% | 28.7% | 27.9% | 29.0% | 29.5% | <0.0001     |
| N missing                                           | 793   | 955   | 898   | 861   | 862   | 316   | 263   | 167   | 183   | 166   | 205   | 169   | 207   | 234   |             |
| Use of antihypertensive drugs*                      | 47.5% | 47.9% | 49.1% | 49.9% | 48.0% | 48.4% | 49.2% | 49.4% | 49.2% | 49.4% | 49.8% | 50.3% | 48.9% | 50.5% | <0.0001     |
| N missing                                           | 6     | 13    | 9     | 24    | 15    | 41    | 26    | 33    | 31    | 23    | 84    | 85    | 92    | 99    |             |
| Use of lipid lowering drugs†                        | 24.5% | 25.0% | 26.5% | 28.8% | 27.7% | 28.4% | 28.4% | 28.8% | 27.6% | 27.9% | 27.7% | 28.0% | 26.9% | 28.6% | 0.004       |
| N missing                                           | 8     | 17    | 15    | 30    | 20    | 44    | 29    | 39    | 29    | 31    | 94    | 103   | 102   | 131   |             |
| Prior diabetes diagnosis                            | 19.3% | 18.5% | 18.7% | 20.1% | 18.1% | 18.8% | 18.9% | 20.3% | 19.7% | 20.5% | 21.7% | 21.1% | 21.5% | 22.6% | <0.0001     |
| N missing                                           | 0     | 0     | 1     | 0     | 0     | 2     | 0     | 1     | 0     | 6     | 1     | 2     | 13    | 21    |             |
| Prior ASCVD diagnosis‡                              | 23.3% | 24.5% | 23.8% | 23.8% | 22.8% | 22.8% | 26.5% | 28.2% | 26.5% | 26.9% | 27.4% | 28.2% | 27.2% | 27.9% | <0.0001     |
| N missing                                           | 0     | 0     | 0     | 0     | 0     | 2     | 0     | 0     | 0     | 0     | 0     | 0     | 0     | 0     |             |

\*ACE inhibitor, ARB, beta blocker, diuretics, and/or calcium channel blocker. †Statins and/or ezetimibe. ‡MI, PCI, CABG or stroke. ACE, angiotensin converting enzyme; ARB, angiotensin receptor blocker; ASCVD, atherosclerotic cardiovascular disease; BMI, body mass index;

1  
2  
3 CABG, coronary artery bypass grafting; eGFR, estimated glomerular filtration rate; MI, myocardial infarction; PCI, percutaneous coronary  
4 intervention. 4  
5  
6  
7  
8  
9  
10  
11  
12  
13  
14  
15  
16  
17  
18  
19  
20  
21  
22  
23  
24  
25  
26  
27  
28  
29  
30  
31  
32  
33  
34  
35  
36  
37  
38  
39  
40  
41  
42  
43  
44  
45  
46

For peer review only

**Table S3.** Type of MI, revascularization during hospitalization, and pharmacological treatment at discharge by year. Data are presented as numbers (N) and proportions (%).

5

| Year                                   | 2006  | 2007  | 2008  | 2009  | 2010  | 2011  | 2012  | 2013  | 2014  | 2015  | 2016  | 2017  | 2018  | 2019  | p for trend |
|----------------------------------------|-------|-------|-------|-------|-------|-------|-------|-------|-------|-------|-------|-------|-------|-------|-------------|
| N                                      | 2502  | 3942  | 5223  | 4948  | 4720  | 5368  | 5976  | 6530  | 6432  | 6831  | 7121  | 7073  | 7269  | 7428  |             |
| STEMI                                  | 39.3% | 38.8% | 36.4% | 38.9% | 39.7% | 39.2% | 37.6% | 37.2% | 38.9% | 38.9% | 38.6% | 38.9% | 40.4% | 40.5% | <0.0001     |
| N missing                              | 0     | 1     | 2     | 69    | 52    | 48    | 55    | 5     | 0     | 0     | 0     | 0     | 0     | 0     |             |
| Revascularized* during hospitalization | 65.1% | 71.5% | 71.1% | 71.1% | 76.4% | 87.3% | 82.2% | 83.9% | 86.0% | 88.6% | 88.5% | 89.6% | 90.6% | 90.3% | <0.0001     |
| N missing                              | 0     | 0     | 0     | 0     | 0     | 0     | 0     | 0     | 0     | 0     | 0     | 0     | 0     | 0     |             |
| <b>Discharge medication</b>            |       |       |       |       |       |       |       |       |       |       |       |       |       |       |             |
| Statin                                 | 90.4% | 93.5% | 94.7% | 95.7% | 96.7% | 96.8% | 97.1% | 96.8% | 97.3% | 97.7% | 97.5% | 97.3% | 96.9% | 97.0% | <0.0001     |
| N missing                              | 1     | 2     | 4     | 1     | 1     | 2     | 1     | 4     | 5     | 2     | 0     | 2     | 2     | 8     |             |
| Ezetimibe                              | 1.3%  | 1.5%  | 2.0%  | 2.0%  | 1.5%  | 1.6%  | 1.5%  | 1.5%  | 1.6%  | 1.5%  | 2.4%  | 3.1%  | 4.2%  | 5.1%  | <0.0001     |
| N missing                              | 3     | 7     | 16    | 7     | 4     | 4     | 3     | 8     | 7     | 2     | 1     | 0     | 798   | 4     |             |
| ACE-inhibitor/ARB                      | 64.3% | 67.1% | 72.4% | 75.6% | 78.9% | 82.5% | 82.8% | 84.0% | 83.9% | 85.1% | 85.1% | 85.8% | 85.3% | 84.7% | <0.0001     |
| N missing                              | 3     | 6     | 6     | 2     | 3     | 9     | 3     | 5     | 6     | 3     | 3     | 1     | 2     | 4     |             |
| Beta blocker                           | 92.2% | 90.6% | 92.3% | 93.1% | 92.8% | 93.2% | 92.1% | 91.9% | 90.9% | 90.2% | 90.3% | 89.7% | 88.2% | 81.5% | <0.0001     |
| N missing                              | 2     | 3     | 7     | 0     | 0     | 3     | 2     | 0     | 3     | 2     | 1     | 1     | 2     | 4     |             |
| Acetylsalicylic acid                   | 94.0% | 96.2% | 95.9% | 96.2% | 96.6% | 96.9% | 97.6% | 97.2% | 96.3% | 96.2% | 95.9% | 96.2% | 95.9% | 95.3% | 0.114       |
| N missing                              | 1     | 1     | 3     | 0     | 0     | 2     | 2     | 1     | 4     | 1     | 9     | 3     | 5     | 5     |             |
| P2Y <sub>12</sub> -receptor antagonist | 79.3% | 84.0% | 84.5% | 86.0% | 89.2% | 87.4% | 82.8% | 85.3% | 89.9% | 90.5% | 91.2% | 90.9% | 90.7% | 91.0% | <0.0001     |
| N missing                              | 0     | 0     | 0     | 0     | 0     | 0     | 0     | 0     | 0     | 0     | 0     | 0     | 1     | 1     |             |

| Year         | 2006  | 2007  | 2008  | 2009  | 2010  | 2011  | 2012  | 2013  | 2014  | 2015  | 2016  | 2017  | 2018  | 2019  | p for trend |
|--------------|-------|-------|-------|-------|-------|-------|-------|-------|-------|-------|-------|-------|-------|-------|-------------|
| N            | 2502  | 3942  | 5223  | 4948  | 4720  | 5368  | 5976  | 6530  | 6432  | 6831  | 7121  | 7073  | 7269  | 7428  |             |
| DAPT/DAT/TAT | 78.1% | 83.9% | 84.2% | 85.8% | 88.6% | 87.5% | 83.3% | 85.3% | 89.8% | 90.7% | 91.2% | 91.2% | 91.1% | 91.5% | <0.0001     |
| N missing    | 1     | 1     | 3     | 0     | 0     | 2     | 2     | 1     | 4     | 1     | 9     | 3     | 5     | 5     |             |

\*Percutaneous coronary intervention or coronary artery bypass grafting. ACE, angiotensin converting enzyme; ARB, angiotensin receptor blocker; DAPT, dual antiplatelet therapy; DAT, dual antithrombotic therapy; N, number; N/A, no data available; STEMI, ST-elevation myocardial infarction; TAT, triple antithrombotic therapy.



**Table S4.** Median (q1, q3) values for selected continuous variables at the one-year follow-up visit.

| Year                       | 2006           | 2007           | 2008           | 2009           | 2010           | 2011           | 2012           | 2013           | 2014           | 2015           | 2016           | 2017           | 2018           | 2019           | p for trend |
|----------------------------|----------------|----------------|----------------|----------------|----------------|----------------|----------------|----------------|----------------|----------------|----------------|----------------|----------------|----------------|-------------|
| <b>N</b>                   | 2502           | 3942           | 5223           | 4948           | 4720           | 5368           | 5976           | 6530           | 6432           | 6831           | 7121           | 7073           | 7269           | 7428           |             |
| Systolic BP (mmHg)         | 130 (120, 145) | 130 (120, 140) | 130 (120, 140) | 130 (120, 140) | 130 (120, 140) | 130 (120, 140) | 130 (120, 140) | 130 (120, 140) | 130 (120, 140) | 130 (120, 140) | 130 (120, 138) | 130 (120, 138) | 130 (120, 137) | 128 (120, 135) | <0.0001     |
| N missing                  | 869            | 1308           | 1351           | 996            | 711            | 945            | 999            | 675            | 381            | 339            | 262            | 196            | 234            | 219            |             |
| Diastolic BP (mmHg)        | 80 (70, 82)    | 78 (70, 80)    | 80 (70, 80)    | 76 (70, 80)    | 80 (70, 80)    | 80 (70, 80)    | 80 (70, 84)    | 80 (70, 82)    | 79 (70, 82)    | 78 (70, 80)    | 77 (70, 80)    | 77 (70, 81)    | 76 (70, 81)    | 76 (70, 80)    | <0.0001     |
| N missing                  | 871            | 1314           | 1364           | 999            | 715            | 947            | 1008           | 689            | 392            | 344            | 267            | 201            | 238            | 226            |             |
| Total cholesterol (mmol/L) | 4.2 (3.6, 4.8) | 4.1 (3.6, 4.7) | 4.1 (3.6, 4.6) | 4.2 (3.7, 4.7) | 4.1 (3.6, 4.7) | 4.2 (3.6, 4.8) | 4.1 (3.6, 4.7) | 4.0 (3.5, 4.6) | 3.8 (3.3, 4.4) | 3.7 (3.2, 4.3) | 3.6 (3.2, 4.2) | 3.5 (3.1, 4.1) | 3.4 (3.0, 4.0) | 3.3 (2.9, 3.8) | <0.0001     |
| N missing                  | 690            | 1383           | 1819           | 1664           | 1117           | 1152           | 1162           | 759            | 410            | 434            | 407            | 345            | 381            | 370            |             |
| LDL-C (mmol/L)             | 2.1 (1.7, 2.6) | 2.2 (1.8, 2.6) | 2.2 (1.7, 2.6) | 2.3 (1.9, 2.7) | 2.2 (1.8, 2.7) | 2.2 (1.8, 2.7) | 2.2 (1.8, 2.7) | 2.1 (1.7, 2.5) | 1.9 (1.6, 2.4) | 1.8 (1.5, 2.3) | 1.8 (1.4, 2.2) | 1.7 (1.4, 2.1) | 1.7 (1.4, 2.1) | 1.6 (1.3, 1.9) | <0.0001     |
| N missing                  | 729            | 1443           | 1891           | 1745           | 1247           | 1238           | 1310           | 837            | 439            | 419            | 338            | 244            | 255            | 224            |             |
| HDL-C (mmol/L)             | 1.3 (1.1, 1.5) | 1.2 (1.0, 1.4) | 1.2 (1.0, 1.4) | 1.2 (1.0, 1.4) | 1.2 (1.0, 1.4) | 1.2 (1.0, 1.5) | 1.2 (1.0, 1.5) | 1.2 (1.0, 1.5) | 1.2 (1.0, 1.5) | 1.2 (1.0, 1.5) | 1.2 (1.0, 1.5) | 1.2 (1.0, 1.5) | 1.2 (1.0, 1.4) | 1.2 (1.0, 1.4) | 0.552       |
| N missing                  | 714            | 1423           | 1860           | 1720           | 1180           | 1217           | 1253           | 850            | 481            | 627            | 679            | 644            | 667            | 641            |             |
| Triglycerides (mmol/L)     | 1.4 (1.0, 1.9) | 1.3 (1.0, 1.9) | 1.3 (1.0, 1.9) | 1.4 (1.0, 1.9) | 1.3 (1.0, 1.8) | 1.3 (1.0, 1.8) | 1.3 (1.0, 1.8) | 1.3 (1.0, 1.8) | 1.2 (0.9, 1.7) | 1.2 (0.9, 1.7) | 1.2 (0.9, 1.6) | 1.2 (0.9, 1.7) | 1.2 (0.9, 1.6) | 1.1 (0.8, 1.6) | <0.0001     |
| N missing                  | 720            | 1415           | 1869           | 1701           | 1204           | 1192           | 1286           | 907            | 727            | 966            | 1153           | 1139           | 1259           | 1175           |             |

| Year                       | 2006              | 2007              | 2008              | 2009              | 2010              | 2011              | 2012              | 2013              | 2014              | 2015              | 2016              | 2017              | 2018              | 2019              | p for trend |
|----------------------------|-------------------|-------------------|-------------------|-------------------|-------------------|-------------------|-------------------|-------------------|-------------------|-------------------|-------------------|-------------------|-------------------|-------------------|-------------|
| N                          | 2502              | 3942              | 5223              | 4948              | 4720              | 5368              | 5976              | 6530              | 6432              | 6831              | 7121              | 7073              | 7269              | 7428              |             |
| F-glucose (mmol/L)         | 5.7 (5.2, 6.5)    | 5.7 (5.2, 6.4)    | 5.7 (5.2, 6.6)    | 5.7 (5.2, 6.5)    | 5.7 (5.3, 6.5)    | 5.8 (5.3, 6.6)    | 5.8 (5.3, 6.6)    | 5.9 (5.4, 6.8)    | 5.9 (5.4, 6.7)    | 6.0 (5.5, 6.7)    | 6.0 (5.5, 6.8)    | 6.0 (5.5, 6.8)    | 6.0 (5.5, 6.7)    | 6.0 (5.5, 6.8)    | <0.0001     |
| N missing                  | 893               | 1391              | 1820              | 1639              | 1374              | 1777              | 2128              | 1923              | 1953              | 2332              | 2376              | 2598              | 2830              | 3006              |             |
| HbA1c (mmol/mol)*          | 56.0 (49.0, 68.0) | 56.5 (49.0, 68.0) | 56.0 (48.0, 66.0) | 55.0 (48.0, 67.0) | 55.0 (49.0, 69.0) | 56.0 (49.0, 68.0) | 58.0 (50.0, 70.0) | 57.0 (48.0, 69.0) | 54.0 (47.0, 67.0) | 55.0 (46.0, 66.0) | 55.0 (47.0, 66.0) | 54.0 (46.0, 66.0) | 53.0 (46.0, 63.0) | 52.0 (46.0, 64.0) | <0.0001     |
| N missing                  | 165               | 215               | 242               | 274               | 267               | 372               | 407               | 496               | 595               | 676               | 735               | 755               | 801               | 868               |             |
| BMI (kg/m <sup>2</sup> )   | 26.8 (24.7, 29.7) | 27.1 (24.7, 30.0) | 27.2 (24.8, 30.1) | 27.1 (24.7, 30.0) | 27.2 (24.8, 30.2) | 27.2 (24.8, 30.2) | 27.4 (24.8, 30.4) | 27.2 (24.8, 30.3) | 27.2 (24.8, 30.2) | 27.3 (24.6, 30.3) | 27.4 (24.7, 30.6) | 27.4 (24.8, 30.6) | 27.4 (24.8, 30.5) | 27.4 (24.8, 30.6) | 0.0007      |
| N missing                  | 1203              | 1694              | 1899              | 1751              | 1462              | 1292              | 1583              | 1442              | 1367              | 1589              | 1782              | 1874              | 2396              | 2630              |             |
| Waist circumference (cm)   | 99 (92, 106)      | 100 (93, 107)     | 100 (92, 107)     | 100 (93, 107)     | 100 (93, 108)     | 100 (93, 108)     | 100 (93, 108)     | 100 (93, 108)     | 101 (93, 109)     | 101 (93, 109)     | 101 (93, 110)     | 101 (94, 110)     | 101 (93, 110)     | 101 (94, 109)     | <0.0001     |
| N missing                  | 1306              | 1799              | 2111              | 1771              | 1409              | 1822              | 2079              | 2246              | 2138              | 2551              | 2984              | 3301              | 3789              | 4403              |             |
| Physical activity (days)** | 4 (1, 7)          | 4 (1, 7)          | 4 (1, 7)          | 4 (1, 7)          | 3 (1, 7)          | 4 (1, 7)          | 3 (1, 6)          | 3 (1, 7)          | 3 (1, 7)          | 4 (1, 7)          | 3 (1, 7)          | 3 (1, 6)          | 3 (1, 6)          | 3 (1, 6)          | <0.0001     |
| N missing                  | 140               | 237               | 551               | 377               | 24                | 112               | 59                | 55                | 40                | 37                | 56                | 35                | 59                | 68                |             |

\*Patients with diabetes only. \*\* Days during the last week of physical activity (at least 30 minutes per day). BMI, body mass index; BP, blood pressure; F, fasting; HbA1c, hemoglobin A1c; HDL-C, high-density lipoprotein cholesterol; LDL-C, low-density lipoprotein cholesterol; N, number; N/A, no data available; q1, lower quartile; q3, upper quartile.

**Table S5.** Mean (+/-SD) delta values between hospitalization and one-year follow-up for selected continuous variables.

9

| Year                     | 2006            | 2007            | 2008            | 2009            | 2010            | 2011                 | 2012                  | 2013                  | 2014                  | 2015               | 2016                 | 2017               | 2018               | 2019                | p for trend |
|--------------------------|-----------------|-----------------|-----------------|-----------------|-----------------|----------------------|-----------------------|-----------------------|-----------------------|--------------------|----------------------|--------------------|--------------------|---------------------|-------------|
| Systolic BP (mmHg)       | -25.2<br>(25.8) | -25.2<br>(26.0) | -24.5<br>(26.0) | -25.4<br>(25.8) | -25.8<br>(25.9) | -26.5<br>(25.7)      | -26.5<br>(25.5)       | -26.9<br>(26.0)       | -28.5<br>(26.4)       | -28.4<br>(25.3)    | -29.9<br>(25.2)      | -29.5<br>(25.5)    | -29.9<br>(25.1)    | -30.2<br>(24.9)     | <0.0001     |
| Diastolic BP (mmHg)      | -16.6<br>(13.5) | -16.7<br>(14.7) | -16.1<br>(14.6) | -17.2<br>(14.5) | -16.2<br>(14.1) | -16.2<br>(14.2)      | -16.0<br>(14.6)       | -16.7<br>(14.6)       | -17.2<br>(14.8)       | -17.5<br>(14.2)    | -18.1<br>(14.4)      | -17.9<br>(14.3)    | -18.4<br>(14.0)    | -20.1<br>(14.3)     | <0.0001     |
| LDL-C (mmol/L)           | -0.83<br>(1.11) | -0.75<br>(1.05) | -0.83<br>(1.10) | -0.78<br>(1.12) | -0.89<br>(1.11) | -0.91<br>(1.13)      | -0.93<br>(1.17)       | -1.02<br>(1.21)       | -1.10<br>(1.16)       | -1.13<br>(1.17)    | -1.23<br>(1.19)      | -1.24<br>(1.18)    | -1.26<br>(1.21)    | -1.29<br>(1.20)     | <0.0001     |
| F-glucose (mmol/L)       | -1.59<br>(3.33) | -1.40<br>(3.02) | -1.46<br>(3.08) | -1.52<br>(3.16) | -1.46<br>(3.17) | -1.47<br>(2.85)      | -1.36<br>(3.02)       | -1.30<br>(3.10)       | -1.40<br>(3.17)       | -1.37<br>(3.08)    | -1.42<br>(3.11)      | -1.37<br>(2.87)    | -1.45<br>(3.11)    | -1.62<br>(3.39)     | 0.670       |
| HbA1c (mmol/mol) *       | N/A             | N/A             | N/A             | N/A             | N/A             | -1.5 (-<br>9.0, 5.0) | -1.0 (-<br>11.0, 5.0) | -2.0 (-<br>10.0, 4.0) | -1.0 (-<br>10.0, 3.0) | 0.0 (-8.0,<br>6.0) | -1.0 (-<br>9.0, 5.0) | 0.0 (-7.0,<br>6.0) | 0.0 (-7.0,<br>5.0) | -1.0 (-9.0,<br>4.0) | 0.297       |
| BMI (kg/m <sup>2</sup> ) | 0.24<br>(1.80)  | 0.17<br>(1.91)  | 0.30<br>(1.80)  | 0.23<br>(1.88)  | 0.25<br>(1.86)  | 0.23<br>(1.91)       | 0.21<br>(1.91)        | 0.09<br>(1.91)        | 0.06<br>(1.88)        | 0.04<br>(2.06)     | -0.03<br>(2.00)      | -0.01<br>(1.97)    | -0.11<br>(2.09)    | -0.15<br>(2.11)     | <0.0001     |

\*Patients with diabetes only. BMI, body mass index; BP, blood pressure; CCU, coronary care unit; F, fasting; HbA1c, hemoglobin A1c; LDL-C, low-density lipoprotein cholesterol; N, number; N/A, no data available; SD, standard deviation.

**Table S6.** Patient demographics for the EUROASPIRE surveys III, IV and V (1-3).

10

| Survey | Years conducted | Number of patients | % men | Number of participating centres | Number of participating countries | Median (IQR) time (years) after index event |
|--------|-----------------|--------------------|-------|---------------------------------|-----------------------------------|---------------------------------------------|
| III    | 2006-2007       | 8966               | 73%   | 76                              | 22                                | 1.2 (1.0-1.8)                               |
| IV     | 2011-2012       | 7998               | 76%   | 78                              | 24                                | 1.4 (1.0-1.9)                               |
| V      | 2016-2017       | 8261               | 74%   | 131                             | 27                                | 1.1 (0.8-1.6)                               |

IQR, inter quartile range.

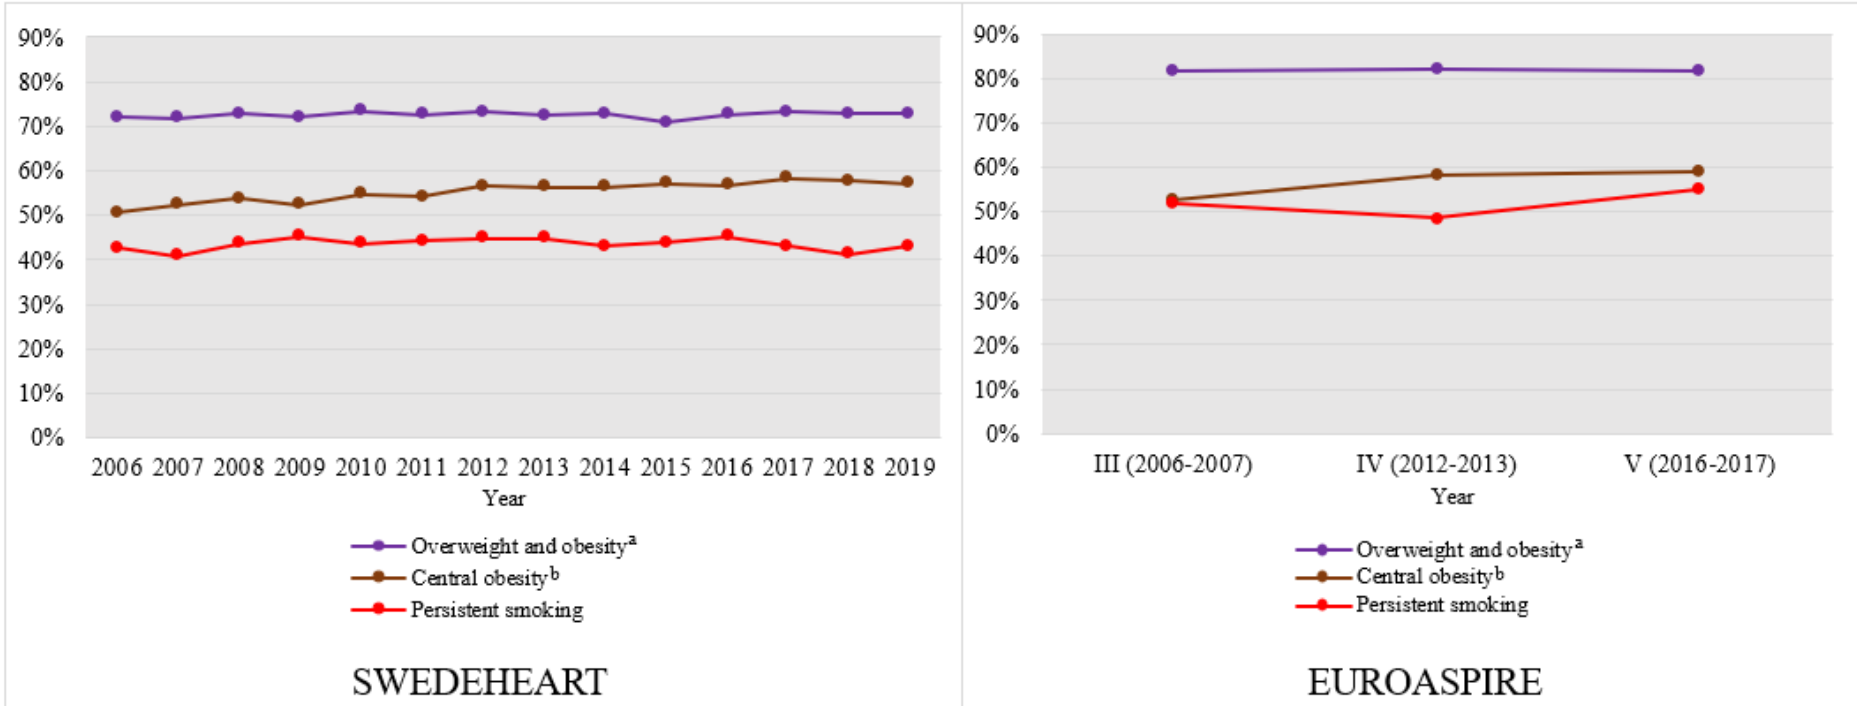

**Figure S1.** Lifestyle factors at one-year in SWEDEHEART (left panel) and EUROASPIRE (right panel) where comparable data in the two cohorts was available (1-3). <sup>a</sup>Body mass index  $\geq 25$  kg/m<sup>2</sup>; <sup>b</sup>waist circumference  $\geq 102$  cm for men and  $\geq 88$  cm for women.

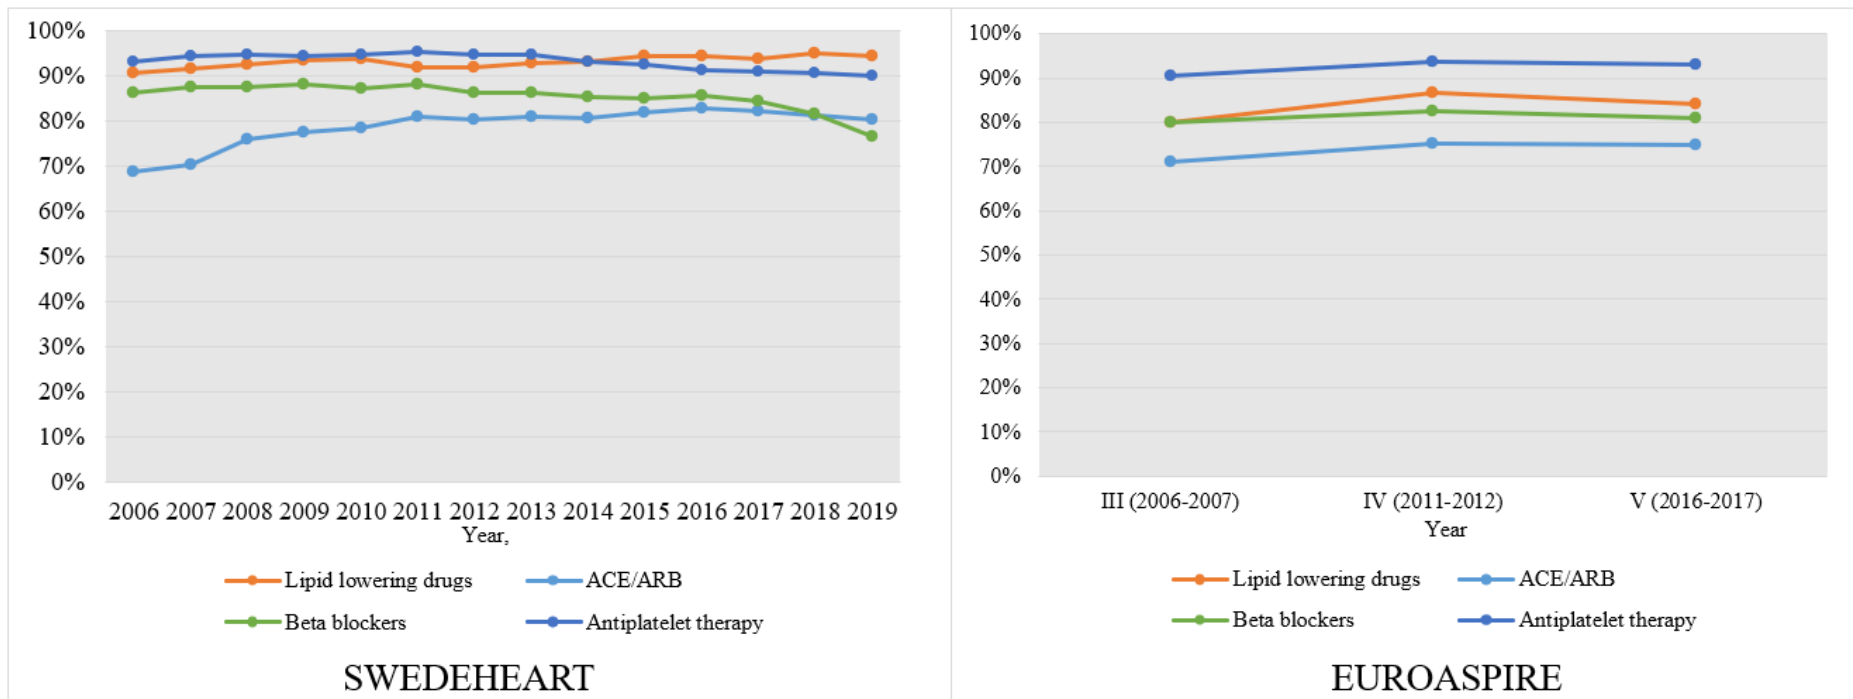

**Figure S2.** Proportion of patients at one-year follow-up for each year 2006-2019 in SWEDEHEART treated with lipid lowering therapy (statins or ezetimibe), ACEi or ARB, beta blockers or antiplatelet therapy (ASA or P2Y<sub>12</sub>-receptor antagonists). Corresponding data from the EUROASPIRE III-V surveys shown on the right panel of the figure (1-3). In EUROASPIRE lipid lowering drugs included statins, ezetimibe, fibrates, bile acid sequestrants and nicotinic acid.

ACEi, angiotensin converting enzyme inhibitors; ARB, angiotensin receptor blockers; ASA, acetylsalicylic acid.

**References**

1

1. Kotseva K, De Backer G, De Bacquer D, Ryden L, Hoes A, Grobbee D, et al. Lifestyle and impact on cardiovascular risk factor control in coronary patients across 27 countries: Results from the European Society of Cardiology ESC-EORP EUROASPIRE V registry. *Eur J Prev Cardiol.* 2019;26(8):824-35.
2. Kotseva K, Wood D, De Backer G, De Bacquer D, Pyorala K, Keil U, et al. EUROASPIRE III: a survey on the lifestyle, risk factors and use of cardioprotective drug therapies in coronary patients from 22 European countries. *Eur J Cardiovasc Prev Rehabil.* 2009;16(2):121-37.
3. Kotseva K, Wood D, De Bacquer D, De Backer G, Ryden L, Jennings C, et al. EUROASPIRE IV: A European Society of Cardiology survey on the lifestyle, risk factor and therapeutic management of coronary patients from 24 European countries. *Eur J Prev Cardiol.* 2016;23(6):636-48.

STROBE Statement—Checklist of items that should be included in reports of *cohort studies*

|                              | Item No | Recommendation                                                                                                                                                                                                                                                                                                         | Page No                 |
|------------------------------|---------|------------------------------------------------------------------------------------------------------------------------------------------------------------------------------------------------------------------------------------------------------------------------------------------------------------------------|-------------------------|
| <b>Title and abstract</b>    | 1       | (a) Indicate the study's design with a commonly used term in the title or the abstract<br>(b) Provide in the abstract an informative and balanced summary of what was done and what was found                                                                                                                          | 1-2<br>2-3              |
| <b>Introduction</b>          |         |                                                                                                                                                                                                                                                                                                                        |                         |
| Background/rationale         | 2       | Explain the scientific background and rationale for the investigation being reported                                                                                                                                                                                                                                   | 4-5                     |
| Objectives                   | 3       | State specific objectives, including any prespecified hypotheses                                                                                                                                                                                                                                                       | 5                       |
| <b>Methods</b>               |         |                                                                                                                                                                                                                                                                                                                        |                         |
| Study design                 | 4       | Present key elements of study design early in the paper                                                                                                                                                                                                                                                                | 5                       |
| Setting                      | 5       | Describe the setting, locations, and relevant dates, including periods of recruitment, exposure, follow-up, and data collection                                                                                                                                                                                        | 5-7                     |
| Participants                 | 6       | (a) Give the eligibility criteria, and the sources and methods of selection of participants. Describe methods of follow-up<br>(b) For matched studies, give matching criteria and number of exposed and unexposed                                                                                                      | 5-7<br>N/A              |
| Variables                    | 7       | Clearly define all outcomes, exposures, predictors, potential confounders, and effect modifiers. Give diagnostic criteria, if applicable                                                                                                                                                                               | 7-8                     |
| Data sources/<br>measurement | 8*      | For each variable of interest, give sources of data and details of methods of assessment (measurement). Describe comparability of assessment methods if there is more than one group                                                                                                                                   | 5-7                     |
| Bias                         | 9       | Describe any efforts to address potential sources of bias                                                                                                                                                                                                                                                              | N/A                     |
| Study size                   | 10      | Explain how the study size was arrived at                                                                                                                                                                                                                                                                              | 5-6                     |
| Quantitative variables       | 11      | Explain how quantitative variables were handled in the analyses. If applicable, describe which groupings were chosen and why                                                                                                                                                                                           | 5-8                     |
| Statistical methods          | 12      | (a) Describe all statistical methods, including those used to control for confounding<br>(b) Describe any methods used to examine subgroups and interactions<br>(c) Explain how missing data were addressed<br>(d) If applicable, explain how loss to follow-up was addressed<br>(e) Describe any sensitivity analyses | 8                       |
| <b>Results</b>               |         |                                                                                                                                                                                                                                                                                                                        |                         |
| Participants                 | 13*     | (a) Report numbers of individuals at each stage of study—eg numbers potentially eligible, examined for eligibility, confirmed eligible, included in the study, completing follow-up, and analysed<br>(b) Give reasons for non-participation at each stage<br>(c) Consider use of a flow diagram                        | 9                       |
| Descriptive data             | 14*     | (a) Give characteristics of study participants (eg demographic, clinical, social) and information on exposures and potential confounders<br>(b) Indicate number of participants with missing data for each variable of interest<br>(c) Summarise follow-up time (eg, average and total amount)                         | 9 and<br>Tables<br>S1-3 |
| Outcome data                 | 15*     | Report numbers of outcome events or summary measures over time                                                                                                                                                                                                                                                         | Table<br>S4             |



1  
2  
3  
4  
5  
6  
7  
8  
9  
10  
11  
12  
13  
14  
15  
16  
17  
18  
19  
20  
21  
22  
23  
24  
25  
26  
27  
28  
29  
30  
31  
32  
33  
34  
35  
36  
37  
38  
39  
40  
41  
42  
43  
44  
45  
46  
47  
48  
49  
50  
51  
52  
53  
54  
55  
56  
57  
58  
59  
60

|                          |    |                                                                                                                                                                                                                                                                                                                                                                                                                       |                                    |
|--------------------------|----|-----------------------------------------------------------------------------------------------------------------------------------------------------------------------------------------------------------------------------------------------------------------------------------------------------------------------------------------------------------------------------------------------------------------------|------------------------------------|
| Main results             | 16 | (a) Give unadjusted estimates and, if applicable, confounder-adjusted estimates and their precision (eg, 95% confidence interval). Make clear which confounders were adjusted for and why they were included<br><br>(b) Report category boundaries when continuous variables were categorized<br><br>(c) If relevant, consider translating estimates of relative risk into absolute risk for a meaningful time period | 10-11<br>Fig 1-5<br>Tables<br>S1-5 |
| Other analyses           | 17 | Report other analyses done—eg analyses of subgroups and interactions, and sensitivity analyses                                                                                                                                                                                                                                                                                                                        | Table<br>S6<br>Figures<br>S1-2     |
| <b>Discussion</b>        |    |                                                                                                                                                                                                                                                                                                                                                                                                                       |                                    |
| Key results              | 18 | Summarise key results with reference to study objectives                                                                                                                                                                                                                                                                                                                                                              | 11                                 |
| Limitations              | 19 | Discuss limitations of the study, taking into account sources of potential bias or imprecision. Discuss both direction and magnitude of any potential bias                                                                                                                                                                                                                                                            | 16-17                              |
| Interpretation           | 20 | Give a cautious overall interpretation of results considering objectives, limitations, multiplicity of analyses, results from similar studies, and other relevant evidence                                                                                                                                                                                                                                            | 11-17                              |
| Generalisability         | 21 | Discuss the generalisability (external validity) of the study results                                                                                                                                                                                                                                                                                                                                                 | 11-17                              |
| <b>Other information</b> |    |                                                                                                                                                                                                                                                                                                                                                                                                                       |                                    |
| Funding                  | 22 | Give the source of funding and the role of the funders for the present study and, if applicable, for the original study on which the present article is based                                                                                                                                                                                                                                                         | N/A                                |

\*Give information separately for exposed and unexposed groups.

**Note:** An Explanation and Elaboration article discusses each checklist item and gives methodological background and published examples of transparent reporting. The STROBE checklist is best used in conjunction with this article (freely available on the Web sites of PLoS Medicine at <http://www.plosmedicine.org/>, Annals of Internal Medicine at <http://www.annals.org/>, and Epidemiology at <http://www.epidem.com/>). Information on the STROBE Initiative is available at <http://www.strobe-statement.org>.
