# Supplementary material for: Temporal trends in cardiovascular risk factors, lifestyle and secondary preventive medication for patients with myocardial infarction attending cardiac rehabilitation in Sweden 2006–2019: a registry-based cohort study
Source: PubMed Central journal article supplement — BMJ Open. 2023 May 12;13(5):e069770. doi: 10.1136/bmjopen-2022-069770 (PMC10186442; doi:10.1136/bmjopen-2022-069770), 2023-05-12
Supplement: bmjopen-2022-069770supp001.pdf [file bmjopen-2022-069770supp001.pdf]

## Supplementary material

Temporal trends in cardiovascular risk factors, lifestyle, and secondary preventive medication for patients with myocardial infarction attending cardiac rehabilitation in Sweden 2006-2019: a registry-based cohort study

**Table S1.** Patient characteristics during hospitalization (continuous variables) by year. Data are presented as median values (q1, q3).

1

| Year                       | 2006           | 2007           | 2008           | 2009           | 2010           | 2011           | 2012           | 2013           | 2014           | 2015           | 2016           | 2017           | 2018           | 2019           | p for trend |
|----------------------------|----------------|----------------|----------------|----------------|----------------|----------------|----------------|----------------|----------------|----------------|----------------|----------------|----------------|----------------|-------------|
| <b>N</b>                   | 2502           | 3942           | 5223           | 4948           | 4720           | 5368           | 5976           | 6530           | 6432           | 6831           | 7121           | 7073           | 7269           | 7428           |             |
| Age (years)                | 63 (57, 69)    | 63 (57, 69)    | 63 (57, 69)    | 63 (57, 69)    | 63 (57, 69)    | 64 (57, 69)    | 64 (57, 69)    | 64 (57, 69)    | 64 (57, 69)    | 64 (57, 69)    | 65 (57, 70)    | 64 (57, 70)    | 65 (58, 70)    | 65 (58, 70)    | <0.0001     |
| N missing                  | 0              | 0              | 0              | 0              | 0              | 0              | 0              | 0              | 0              | 0              | 0              | 0              | 0              | 0              |             |
| Systolic BP (mmHg)         | 150 (130, 170) | 147 (130, 165) | 145 (130, 165) | 146 (130, 165) | 147 (130, 165) | 149 (130, 168) | 150 (130, 170) | 150 (130, 170) | 150 (131, 170) | 150 (132, 170) | 150 (133, 170) | 150 (132, 170) | 150 (133, 170) | 150 (130, 169) | <0.0001     |
| N missing                  | 293            | 406            | 479            | 456            | 308            | 7              | 18             | 36             | 48             | 51             | 44             | 2              | 3              | 4              |             |
| Diastolic BP (mmHg)        | 85 (74, 100)   | 85 (75, 98)    | 85 (75, 97)    | 85 (75, 97)    | 85 (75, 96)    | 85 (75, 98)    | 87 (76, 100)   | 88 (77, 100)   | 88 (78, 100)   | 89 (79, 100)   | 89 (78, 99)    | 89 (79, 100)   | 90 (79, 100)   | 89 (79, 100)   | <0.0001     |
| N missing                  | 330            | 471            | 529            | 509            | 410            | 130            | 176            | 213            | 290            | 299            | 261            | 227            | 352            | 454            |             |
| Total cholesterol (mmol/L) | 5.0 (4.3, 5.8) | 5.0 (4.2, 5.8) | 4.9 (4.2, 5.7) | 5.0 (4.2, 5.8) | 5.1 (4.3, 5.9) | 5.1 (4.3, 6.0) | 5.1 (4.3, 6.0) | 5.1 (4.3, 6.0) | 5.0 (4.2, 5.9) | 5.0 (4.2, 5.8) | 5.0 (4.2, 5.9) | 5.0 (4.1, 5.8) | 5.0 (4.1, 5.9) | 4.9 (4.0, 5.7) | <0.0001     |
| N missing                  | 329            | 554            | 788            | 833            | 835            | 1108           | 1185           | 1280           | 1204           | 1088           | 947            | 835            | 686            | 727            |             |
| LDL-C (mmol/L)             | 3.0 (2.3, 3.7) | 3.0 (2.3, 3.7) | 3.0 (2.3, 3.7) | 3.1 (2.3, 3.8) | 3.2 (2.5, 3.9) | 3.2 (2.5, 3.9) | 3.2 (2.5, 4.0) | 3.2 (2.4, 3.9) | 3.1 (2.3, 3.9) | 3.1 (2.3, 3.8) | 3.1 (2.3, 3.9) | 3.0 (2.2, 3.8) | 3.0 (2.2, 3.8) | 3.0 (2.2, 3.8) | <0.0001     |
| N missing                  | 471            | 844            | 1008           | 972            | 1001           | 1272           | 1420           | 1678           | 1395           | 1234           | 1028           | 927            | 629            | 663            |             |
| HDL-C (mmol/L)             | 1.2 (1.0, 1.4) | 1.2 (1.0, 1.4) | 1.1 (0.9, 1.4) | 1.1 (0.9, 1.3) | 1.1 (0.9, 1.3) | 1.1 (0.9, 1.4) | 1.1 (0.9, 1.4) | 1.1 (1.0, 1.4) | 1.1 (1.0, 1.4) | 1.1 (0.9, 1.4) | 1.1 (0.9, 1.4) | 1.2 (1.0, 1.4) | 1.2 (0.9, 1.4) | 1.1 (0.9, 1.4) | 0.003       |
| N missing                  | 455            | 821            | 898            | 886            | 941            | 1214           | 1330           | 1519           | 1374           | 1188           | 987            | 901            | 746            | 766            |             |

2

| Year                     | 2006              | 2007              | 2008              | 2009              | 2010              | 2011              | 2012              | 2013              | 2014              | 2015              | 2016              | 2017              | 2018              | 2019              | p for trend |
|--------------------------|-------------------|-------------------|-------------------|-------------------|-------------------|-------------------|-------------------|-------------------|-------------------|-------------------|-------------------|-------------------|-------------------|-------------------|-------------|
| <b>N</b>                 | 2502              | 3942              | 5223              | 4948              | 4720              | 5368              | 5976              | 6530              | 6432              | 6831              | 7121              | 7073              | 7269              | 7428              |             |
| Triglycerides (mmol/L)   | 1.5 (1.1, 2.2)    | 1.5 (1.1, 2.1)    | 1.5 (1.1, 2.1)    | 1.5 (1.1, 2.1)    | 1.4 (1.1, 2.0)    | 1.4 (1.0, 2.0)    | 1.4 (1.0, 1.9)    | 1.4 (1.0, 1.9)    | 1.4 (1.0, 2.0)    | 1.4 (1.0, 2.0)    | 1.4 (1.0, 2.0)    | 1.4 (1.0, 2.0)    | 1.4 (1.0, 2.0)    | 1.4 (1.0, 2.0)    | <0.0001     |
| N missing                | 391               | 769               | 897               | 901               | 923               | 1170              | 1318              | 1599              | 1500              | 1601              | 1488              | 1460              | 1481              | 1472              |             |
| F-glucose (mmol/L)       | 6.7 (5.6, 8.4)    | 6.6 (5.7, 8.3)    | 6.7 (5.7, 8.4)    | 6.8 (5.7, 8.5)    | 6.7 (5.8, 8.3)    | 6.8 (5.8, 8.5)    | 6.7 (5.8, 8.4)    | 6.7 (5.9, 8.5)    | 6.8 (5.9, 8.5)    | 6.8 (5.9, 8.6)    | 6.9 (5.9, 8.7)    | 6.9 (5.9, 8.7)    | 6.9 (5.9, 8.6)    | 7.0 (6.0, 8.8)    | <0.0001     |
| N missing                | 213               | 332               | 452               | 363               | 324               | 727               | 1034              | 1147              | 1014              | 767               | 762               | 643               | 812               | 1011              |             |
| HbA1c (mmol/mol)*        | N/A               | N/A               | N/A               | N/A               | N/A               | 59.0 (50.0, 71.0) | 59.0 (48.0, 73.0) | 58.0 (50.0, 73.0) | 61.0 (50.0, 74.0) | 60.0 (50.0, 77.0) | 59.0 (48.0, 74.0) | 56.0 (48.0, 69.0) | 56.0 (48.0, 72.0) | 57.0 (48.0, 69.0) | 0.012       |
| N missing                | 484               | 730               | 977               | 996               | 852               | 776               | 872               | 1059              | 949               | 1071              | 1113              | 980               | 973               | 1012              |             |
| BMI (kg/m <sup>2</sup> ) | 26.7 (24.6, 29.4) | 26.9 (24.7, 29.7) | 26.9 (24.5, 29.7) | 26.9 (24.5, 29.8) | 27.0 (24.7, 29.9) | 27.1 (24.7, 30.0) | 27.2 (24.7, 30.1) | 27.2 (24.7, 30.1) | 27.2 (24.8, 30.1) | 27.2 (24.7, 30.1) | 27.4 (24.8, 30.5) | 27.4 (24.9, 30.4) | 27.5 (24.9, 30.5) | 27.5 (24.9, 30.7) | <0.0001     |
| N missing                | 793               | 955               | 898               | 861               | 862               | 316               | 263               | 167               | 183               | 166               | 205               | 169               | 207               | 234               |             |

\*Patients with diabetes only. BMI, body mass index; BP, blood pressure; F, fasting; HbA1c, hemoglobin A1c; HDL-C, high-density lipoprotein cholesterol; LDL-C, low-density lipoprotein cholesterol; N, number; N/A, no data available; q1, lower quartile; q3, upper quartile.

**Table S2.** Patient characteristics during hospitalization (categorical variables) by year. Data are presented as numbers (N) and proportions (%). <sup>3</sup>

| Year                                                | 2006  | 2007  | 2008  | 2009  | 2010  | 2011  | 2012  | 2013  | 2014  | 2015  | 2016  | 2017  | 2018  | 2019  | p for trend |
|-----------------------------------------------------|-------|-------|-------|-------|-------|-------|-------|-------|-------|-------|-------|-------|-------|-------|-------------|
| N                                                   | 2502  | 3942  | 5223  | 4948  | 4720  | 5368  | 5976  | 6530  | 6432  | 6831  | 7121  | 7073  | 7269  | 7428  |             |
| Male sex                                            | 73.5% | 74.4% | 73.1% | 73.7% | 74.1% | 74.5% | 74.6% | 74.1% | 76.2% | 75.3% | 74.5% | 76.2% | 75.1% | 75.2% | <0.0001     |
| N missing                                           | 0     | 0     | 0     | 0     | 0     | 0     | 0     | 0     | 0     | 0     | 0     | 0     | 0     | 0     |             |
| Current smoking                                     | 32.0% | 32.6% | 32.4% | 32.1% | 30.8% | 30.4% | 30.4% | 30.1% | 28.9% | 28.5% | 28.0% | 27.6% | 27.4% | 26.5% | <0.0001     |
| N missing                                           | 99    | 150   | 161   | 171   | 130   | 215   | 128   | 143   | 124   | 132   | 145   | 145   | 172   | 177   |             |
| Overweight/obese (BMI $\geq$ 25 kg/m <sup>2</sup> ) | 70.7% | 71.5% | 70.2% | 69.8% | 72.1% | 71.6% | 71.9% | 72.1% | 73.3% | 72.0% | 73.2% | 74.1% | 74.0% | 74.1% | <0.0001     |
| N missing                                           | 793   | 955   | 898   | 861   | 862   | 316   | 263   | 167   | 183   | 166   | 205   | 169   | 207   | 234   |             |
| Obese (BMI $\geq$ 30 kg/m <sup>2</sup> )            | 22.8% | 23.8% | 23.4% | 23.9% | 24.3% | 25.4% | 26.0% | 25.9% | 26.0% | 26.4% | 28.7% | 27.9% | 29.0% | 29.5% | <0.0001     |
| N missing                                           | 793   | 955   | 898   | 861   | 862   | 316   | 263   | 167   | 183   | 166   | 205   | 169   | 207   | 234   |             |
| Use of antihypertensive drugs*                      | 47.5% | 47.9% | 49.1% | 49.9% | 48.0% | 48.4% | 49.2% | 49.4% | 49.2% | 49.4% | 49.8% | 50.3% | 48.9% | 50.5% | <0.0001     |
| N missing                                           | 6     | 13    | 9     | 24    | 15    | 41    | 26    | 33    | 31    | 23    | 84    | 85    | 92    | 99    |             |
| Use of lipid lowering drugs†                        | 24.5% | 25.0% | 26.5% | 28.8% | 27.7% | 28.4% | 28.4% | 28.8% | 27.6% | 27.9% | 27.7% | 28.0% | 26.9% | 28.6% | 0.004       |
| N missing                                           | 8     | 17    | 15    | 30    | 20    | 44    | 29    | 39    | 29    | 31    | 94    | 103   | 102   | 131   |             |
| Prior diabetes diagnosis                            | 19.3% | 18.5% | 18.7% | 20.1% | 18.1% | 18.8% | 18.9% | 20.3% | 19.7% | 20.5% | 21.7% | 21.1% | 21.5% | 22.6% | <0.0001     |
| N missing                                           | 0     | 0     | 1     | 0     | 0     | 2     | 0     | 1     | 0     | 6     | 1     | 2     | 13    | 21    |             |
| Prior ASCVD diagnosis‡                              | 23.3% | 24.5% | 23.8% | 23.8% | 22.8% | 22.8% | 26.5% | 28.2% | 26.5% | 26.9% | 27.4% | 28.2% | 27.2% | 27.9% | <0.0001     |
| N missing                                           | 0     | 0     | 0     | 0     | 0     | 2     | 0     | 0     | 0     | 0     | 0     | 0     | 0     | 0     |             |

\*ACE inhibitor, ARB, beta blocker, diuretics, and/or calcium channel blocker. †Statins and/or ezetimibe. ‡MI, PCI, CABG or stroke. ACE, angiotensin converting enzyme; ARB, angiotensin receptor blocker; ASCVD, atherosclerotic cardiovascular disease; BMI, body mass index;

CABG, coronary artery bypass grafting; eGFR, estimated glomerular filtration rate; MI, myocardial infarction; PCI, percutaneous coronary intervention. †

**Table S3.** Type of MI, revascularization during hospitalization, and pharmacological treatment at discharge by year. Data are presented as numbers (N) and proportions (%).

| Year                                   | 2006  | 2007  | 2008  | 2009  | 2010  | 2011  | 2012  | 2013  | 2014  | 2015  | 2016  | 2017  | 2018  | 2019  | p for trend |
|----------------------------------------|-------|-------|-------|-------|-------|-------|-------|-------|-------|-------|-------|-------|-------|-------|-------------|
| <b>N</b>                               | 2502  | 3942  | 5223  | 4948  | 4720  | 5368  | 5976  | 6530  | 6432  | 6831  | 7121  | 7073  | 7269  | 7428  |             |
| STEMI                                  | 39.3% | 38.8% | 36.4% | 38.9% | 39.7% | 39.2% | 37.6% | 37.2% | 38.9% | 38.9% | 38.6% | 38.9% | 40.4% | 40.5% | <0.0001     |
| N missing                              | 0     | 1     | 2     | 69    | 52    | 48    | 55    | 5     | 0     | 0     | 0     | 0     | 0     | 0     |             |
| Revascularized* during hospitalization | 65.1% | 71.5% | 71.1% | 71.1% | 76.4% | 87.3% | 82.2% | 83.9% | 86.0% | 88.6% | 88.5% | 89.6% | 90.6% | 90.3% | <0.0001     |
| N missing                              | 0     | 0     | 0     | 0     | 0     | 0     | 0     | 0     | 0     | 0     | 0     | 0     | 0     | 0     |             |
| <b>Discharge medication</b>            |       |       |       |       |       |       |       |       |       |       |       |       |       |       |             |
| Statin                                 | 90.4% | 93.5% | 94.7% | 95.7% | 96.7% | 96.8% | 97.1% | 96.8% | 97.3% | 97.7% | 97.5% | 97.3% | 96.9% | 97.0% | <0.0001     |
| N missing                              | 1     | 2     | 4     | 1     | 1     | 2     | 1     | 4     | 5     | 2     | 0     | 2     | 2     | 8     |             |
| Ezetimibe                              | 1.3%  | 1.5%  | 2.0%  | 2.0%  | 1.5%  | 1.6%  | 1.5%  | 1.5%  | 1.6%  | 1.5%  | 2.4%  | 3.1%  | 4.2%  | 5.1%  | <0.0001     |
| N missing                              | 3     | 7     | 16    | 7     | 4     | 4     | 3     | 8     | 7     | 2     | 1     | 0     | 798   | 4     |             |
| ACE-inhibitor/ARB                      | 64.3% | 67.1% | 72.4% | 75.6% | 78.9% | 82.5% | 82.8% | 84.0% | 83.9% | 85.1% | 85.1% | 85.8% | 85.3% | 84.7% | <0.0001     |
| N missing                              | 3     | 6     | 6     | 2     | 3     | 9     | 3     | 5     | 6     | 3     | 3     | 1     | 2     | 4     |             |
| Beta blocker                           | 92.2% | 90.6% | 92.3% | 93.1% | 92.8% | 93.2% | 92.1% | 91.9% | 90.9% | 90.2% | 90.3% | 89.7% | 88.2% | 81.5% | <0.0001     |
| N missing                              | 2     | 3     | 7     | 0     | 0     | 3     | 2     | 0     | 3     | 2     | 1     | 1     | 2     | 4     |             |
| Acetylsalicylic acid                   | 94.0% | 96.2% | 95.9% | 96.2% | 96.6% | 96.9% | 97.6% | 97.2% | 96.3% | 96.2% | 95.9% | 96.2% | 95.9% | 95.3% | 0.114       |
| N missing                              | 1     | 1     | 3     | 0     | 0     | 2     | 2     | 1     | 4     | 1     | 9     | 3     | 5     | 5     |             |
| P2Y <sub>12</sub> -receptor antagonist | 79.3% | 84.0% | 84.5% | 86.0% | 89.2% | 87.4% | 82.8% | 85.3% | 89.9% | 90.5% | 91.2% | 90.9% | 90.7% | 91.0% | <0.0001     |
| N missing                              | 0     | 0     | 0     | 0     | 0     | 0     | 0     | 0     | 0     | 0     | 0     | 0     | 1     | 1     |             |

| Year         | 2006  | 2007  | 2008  | 2009  | 2010  | 2011  | 2012  | 2013  | 2014  | 2015  | 2016  | 2017  | 2018  | 2019  | <sup>6</sup> p for trend |
|--------------|-------|-------|-------|-------|-------|-------|-------|-------|-------|-------|-------|-------|-------|-------|--------------------------|
| N            | 2502  | 3942  | 5223  | 4948  | 4720  | 5368  | 5976  | 6530  | 6432  | 6831  | 7121  | 7073  | 7269  | 7428  |                          |
| DAPT/DAT/TAT | 78.1% | 83.9% | 84.2% | 85.8% | 88.6% | 87.5% | 83.3% | 85.3% | 89.8% | 90.7% | 91.2% | 91.2% | 91.1% | 91.5% | <0.0001                  |
| N missing    | 1     | 1     | 3     | 0     | 0     | 2     | 2     | 1     | 4     | 1     | 9     | 3     | 5     | 5     |                          |

\*Percutaneous coronary intervention or coronary artery bypass grafting. ACE, angiotensin converting enzyme; ARB, angiotensin receptor blocker; DAPT, dual antiplatelet therapy; DAT, dual antithrombotic therapy; N, number; N/A, no data available; STEMI, ST-elevation myocardial infarction; TAT, triple antithrombotic therapy.

**Table S4.** Median (q1, q3) values for selected continuous variables at the one-year follow-up visit.

7

| Year                       | 2006           | 2007           | 2008           | 2009           | 2010           | 2011           | 2012           | 2013           | 2014           | 2015           | 2016           | 2017           | 2018           | 2019           | p for trend |
|----------------------------|----------------|----------------|----------------|----------------|----------------|----------------|----------------|----------------|----------------|----------------|----------------|----------------|----------------|----------------|-------------|
| <b>N</b>                   | 2502           | 3942           | 5223           | 4948           | 4720           | 5368           | 5976           | 6530           | 6432           | 6831           | 7121           | 7073           | 7269           | 7428           |             |
| Systolic BP (mmHg)         | 130 (120, 145) | 130 (120, 140) | 130 (120, 140) | 130 (120, 140) | 130 (120, 140) | 130 (120, 140) | 130 (120, 140) | 130 (120, 140) | 130 (120, 140) | 130 (120, 140) | 130 (120, 138) | 130 (120, 138) | 130 (120, 137) | 128 (120, 135) | <0.0001     |
| N missing                  | 869            | 1308           | 1351           | 996            | 711            | 945            | 999            | 675            | 381            | 339            | 262            | 196            | 234            | 219            |             |
| Diastolic BP (mmHg)        | 80 (70, 82)    | 78 (70, 80)    | 80 (70, 80)    | 76 (70, 80)    | 80 (70, 80)    | 80 (70, 80)    | 80 (70, 84)    | 80 (70, 82)    | 79 (70, 82)    | 78 (70, 80)    | 77 (70, 80)    | 77 (70, 81)    | 76 (70, 81)    | 76 (70, 80)    | <0.0001     |
| N missing                  | 871            | 1314           | 1364           | 999            | 715            | 947            | 1008           | 689            | 392            | 344            | 267            | 201            | 238            | 226            |             |
| Total cholesterol (mmol/L) | 4.2 (3.6, 4.8) | 4.1 (3.6, 4.7) | 4.1 (3.6, 4.6) | 4.2 (3.7, 4.7) | 4.1 (3.6, 4.7) | 4.2 (3.6, 4.8) | 4.1 (3.6, 4.7) | 4.0 (3.5, 4.6) | 3.8 (3.3, 4.4) | 3.7 (3.2, 4.3) | 3.6 (3.2, 4.2) | 3.5 (3.1, 4.1) | 3.4 (3.0, 4.0) | 3.3 (2.9, 3.8) | <0.0001     |
| N missing                  | 690            | 1383           | 1819           | 1664           | 1117           | 1152           | 1162           | 759            | 410            | 434            | 407            | 345            | 381            | 370            |             |
| LDL-C (mmol/L)             | 2.1 (1.7, 2.6) | 2.2 (1.8, 2.6) | 2.2 (1.7, 2.6) | 2.3 (1.9, 2.7) | 2.2 (1.8, 2.7) | 2.2 (1.8, 2.7) | 2.2 (1.8, 2.7) | 2.1 (1.7, 2.5) | 1.9 (1.6, 2.4) | 1.8 (1.5, 2.3) | 1.8 (1.4, 2.2) | 1.7 (1.4, 2.1) | 1.7 (1.4, 2.1) | 1.6 (1.3, 1.9) | <0.0001     |
| N missing                  | 729            | 1443           | 1891           | 1745           | 1247           | 1238           | 1310           | 837            | 439            | 419            | 338            | 244            | 255            | 224            |             |
| HDL-C (mmol/L)             | 1.3 (1.1, 1.5) | 1.2 (1.0, 1.4) | 1.2 (1.0, 1.4) | 1.2 (1.0, 1.4) | 1.2 (1.0, 1.4) | 1.2 (1.0, 1.5) | 1.2 (1.0, 1.5) | 1.2 (1.0, 1.5) | 1.2 (1.0, 1.5) | 1.2 (1.0, 1.5) | 1.2 (1.0, 1.5) | 1.2 (1.0, 1.5) | 1.2 (1.0, 1.4) | 1.2 (1.0, 1.4) | 0.552       |
| N missing                  | 714            | 1423           | 1860           | 1720           | 1180           | 1217           | 1253           | 850            | 481            | 627            | 679            | 644            | 667            | 641            |             |
| Triglycerides (mmol/L)     | 1.4 (1.0, 1.9) | 1.3 (1.0, 1.9) | 1.3 (1.0, 1.9) | 1.4 (1.0, 1.9) | 1.3 (1.0, 1.8) | 1.3 (1.0, 1.8) | 1.3 (1.0, 1.8) | 1.3 (1.0, 1.8) | 1.2 (0.9, 1.7) | 1.2 (0.9, 1.7) | 1.2 (0.9, 1.6) | 1.2 (0.9, 1.7) | 1.2 (0.9, 1.6) | 1.1 (0.8, 1.6) | <0.0001     |
| N missing                  | 720            | 1415           | 1869           | 1701           | 1204           | 1192           | 1286           | 907            | 727            | 966            | 1153           | 1139           | 1259           | 1175           |             |



8

| Year                       | 2006              | 2007              | 2008              | 2009              | 2010              | 2011              | 2012              | 2013              | 2014              | 2015              | 2016              | 2017              | 2018              | 2019              | p for trend |
|----------------------------|-------------------|-------------------|-------------------|-------------------|-------------------|-------------------|-------------------|-------------------|-------------------|-------------------|-------------------|-------------------|-------------------|-------------------|-------------|
| <b>N</b>                   | 2502              | 3942              | 5223              | 4948              | 4720              | 5368              | 5976              | 6530              | 6432              | 6831              | 7121              | 7073              | 7269              | 7428              |             |
| F-glucose (mmol/L)         | 5.7 (5.2, 6.5)    | 5.7 (5.2, 6.4)    | 5.7 (5.2, 6.6)    | 5.7 (5.2, 6.5)    | 5.7 (5.3, 6.5)    | 5.8 (5.3, 6.6)    | 5.8 (5.3, 6.6)    | 5.9 (5.4, 6.8)    | 5.9 (5.4, 6.7)    | 6.0 (5.5, 6.7)    | 6.0 (5.5, 6.8)    | 6.0 (5.5, 6.8)    | 6.0 (5.5, 6.7)    | 6.0 (5.5, 6.8)    | <0.0001     |
| N missing                  | 893               | 1391              | 1820              | 1639              | 1374              | 1777              | 2128              | 1923              | 1953              | 2332              | 2376              | 2598              | 2830              | 3006              |             |
| HbA1c (mmol/mol)*          | 56.0 (49.0, 68.0) | 56.5 (49.0, 68.0) | 56.0 (48.0, 66.0) | 55.0 (48.0, 67.0) | 55.0 (49.0, 69.0) | 56.0 (49.0, 68.0) | 58.0 (50.0, 70.0) | 57.0 (48.0, 69.0) | 54.0 (47.0, 67.0) | 55.0 (46.0, 66.0) | 55.0 (47.0, 66.0) | 54.0 (46.0, 66.0) | 53.0 (46.0, 63.0) | 52.0 (46.0, 64.0) | <0.0001     |
| N missing                  | 165               | 215               | 242               | 274               | 267               | 372               | 407               | 496               | 595               | 676               | 735               | 755               | 801               | 868               |             |
| BMI (kg/m <sup>2</sup> )   | 26.8 (24.7, 29.7) | 27.1 (24.7, 30.0) | 27.2 (24.8, 30.1) | 27.1 (24.7, 30.0) | 27.2 (24.8, 30.2) | 27.2 (24.8, 30.2) | 27.4 (24.8, 30.4) | 27.2 (24.8, 30.3) | 27.2 (24.8, 30.2) | 27.3 (24.6, 30.3) | 27.4 (24.7, 30.6) | 27.4 (24.8, 30.6) | 27.4 (24.8, 30.5) | 27.4 (24.8, 30.6) | 0.0007      |
| N missing                  | 1203              | 1694              | 1899              | 1751              | 1462              | 1292              | 1583              | 1442              | 1367              | 1589              | 1782              | 1874              | 2396              | 2630              |             |
| Waist circumference (cm)   | 99 (92, 106)      | 100 (93, 107)     | 100 (92, 107)     | 100 (93, 107)     | 100 (93, 108)     | 100 (93, 108)     | 100 (93, 108)     | 100 (93, 108)     | 101 (93, 109)     | 101 (93, 109)     | 101 (93, 110)     | 101 (94, 110)     | 101 (93, 110)     | 101 (94, 109)     | <0.0001     |
| N missing                  | 1306              | 1799              | 2111              | 1771              | 1409              | 1822              | 2079              | 2246              | 2138              | 2551              | 2984              | 3301              | 3789              | 4403              |             |
| Physical activity (days)** | 4 (1, 7)          | 4 (1, 7)          | 4 (1, 7)          | 4 (1, 7)          | 3 (1, 7)          | 4 (1, 7)          | 3 (1, 6)          | 3 (1, 7)          | 3 (1, 7)          | 4 (1, 7)          | 3 (1, 7)          | 3 (1, 6)          | 3 (1, 6)          | 3 (1, 6)          | <0.0001     |
| N missing                  | 140               | 237               | 551               | 377               | 24                | 112               | 59                | 55                | 40                | 37                | 56                | 35                | 59                | 68                |             |

\*Patients with diabetes only. \*\* Days during the last week of physical activity (at least 30 minutes per day). BMI, body mass index; BP, blood pressure; F, fasting; HbA1c, hemoglobin A1c; HDL-C, high-density lipoprotein cholesterol; LDL-C, low-density lipoprotein cholesterol; N, number; N/A, no data available; q1, lower quartile; q3, upper quartile.

**Table S5.** Mean (+/-SD) delta values between hospitalization and one-year follow-up for selected continuous variables.

9

| Year                     | 2006            | 2007            | 2008            | 2009            | 2010            | 2011                 | 2012                  | 2013                  | 2014                  | 2015               | 2016                 | 2017               | 2018               | 2019                | p for trend |
|--------------------------|-----------------|-----------------|-----------------|-----------------|-----------------|----------------------|-----------------------|-----------------------|-----------------------|--------------------|----------------------|--------------------|--------------------|---------------------|-------------|
| Systolic BP (mmHg)       | -25.2<br>(25.8) | -25.2<br>(26.0) | -24.5<br>(26.0) | -25.4<br>(25.8) | -25.8<br>(25.9) | -26.5<br>(25.7)      | -26.5<br>(25.5)       | -26.9<br>(26.0)       | -28.5<br>(26.4)       | -28.4<br>(25.3)    | -29.9<br>(25.2)      | -29.5<br>(25.5)    | -29.9<br>(25.1)    | -30.2<br>(24.9)     | <0.0001     |
| Diastolic BP (mmHg)      | -16.6<br>(13.5) | -16.7<br>(14.7) | -16.1<br>(14.6) | -17.2<br>(14.5) | -16.2<br>(14.1) | -16.2<br>(14.2)      | -16.0<br>(14.6)       | -16.7<br>(14.6)       | -17.2<br>(14.8)       | -17.5<br>(14.2)    | -18.1<br>(14.4)      | -17.9<br>(14.3)    | -18.4<br>(14.0)    | -20.1<br>(14.3)     | <0.0001     |
| LDL-C (mmol/L)           | -0.83<br>(1.11) | -0.75<br>(1.05) | -0.83<br>(1.10) | -0.78<br>(1.12) | -0.89<br>(1.11) | -0.91<br>(1.13)      | -0.93<br>(1.17)       | -1.02<br>(1.21)       | -1.10<br>(1.16)       | -1.13<br>(1.17)    | -1.23<br>(1.19)      | -1.24<br>(1.18)    | -1.26<br>(1.21)    | -1.29<br>(1.20)     | <0.0001     |
| F-glucose (mmol/L)       | -1.59<br>(3.33) | -1.40<br>(3.02) | -1.46<br>(3.08) | -1.52<br>(3.16) | -1.46<br>(3.17) | -1.47<br>(2.85)      | -1.36<br>(3.02)       | -1.30<br>(3.10)       | -1.40<br>(3.17)       | -1.37<br>(3.08)    | -1.42<br>(3.11)      | -1.37<br>(2.87)    | -1.45<br>(3.11)    | -1.62<br>(3.39)     | 0.670       |
| HbA1c (mmol/mol) *       | N/A             | N/A             | N/A             | N/A             | N/A             | -1.5 (-<br>9.0, 5.0) | -1.0 (-<br>11.0, 5.0) | -2.0 (-<br>10.0, 4.0) | -1.0 (-<br>10.0, 3.0) | 0.0 (-8.0,<br>6.0) | -1.0 (-<br>9.0, 5.0) | 0.0 (-7.0,<br>6.0) | 0.0 (-7.0,<br>5.0) | -1.0 (-9.0,<br>4.0) | 0.297       |
| BMI (kg/m <sup>2</sup> ) | 0.24<br>(1.80)  | 0.17<br>(1.91)  | 0.30<br>(1.80)  | 0.23<br>(1.88)  | 0.25<br>(1.86)  | 0.23<br>(1.91)       | 0.21<br>(1.91)        | 0.09<br>(1.91)        | 0.06<br>(1.88)        | 0.04<br>(2.06)     | -0.03<br>(2.00)      | -0.01<br>(1.97)    | -0.11<br>(2.09)    | -0.15<br>(2.11)     | <0.0001     |

\*Patients with diabetes only. BMI, body mass index; BP, blood pressure; CCU, coronary care unit; F, fasting; HbA1c, hemoglobin A1c; LDL-C, low-density lipoprotein cholesterol; N, number; N/A, no data available; SD, standard deviation.

**Table S6.** Patient demographics for the EUROASPIRE surveys III, IV and V (1-3).

10

| Survey | Years conducted | Number of patients | % men | Number of participating centres | Number of participating countries | Median (IQR) time (years) after index event |
|--------|-----------------|--------------------|-------|---------------------------------|-----------------------------------|---------------------------------------------|
| III    | 2006-2007       | 8966               | 73%   | 76                              | 22                                | 1.2 (1.0-1.8)                               |
| IV     | 2011-2012       | 7998               | 76%   | 78                              | 24                                | 1.4 (1.0-1.9)                               |
| V      | 2016-2017       | 8261               | 74%   | 131                             | 27                                | 1.1 (0.8-1.6)                               |

IQR, inter quartile range.

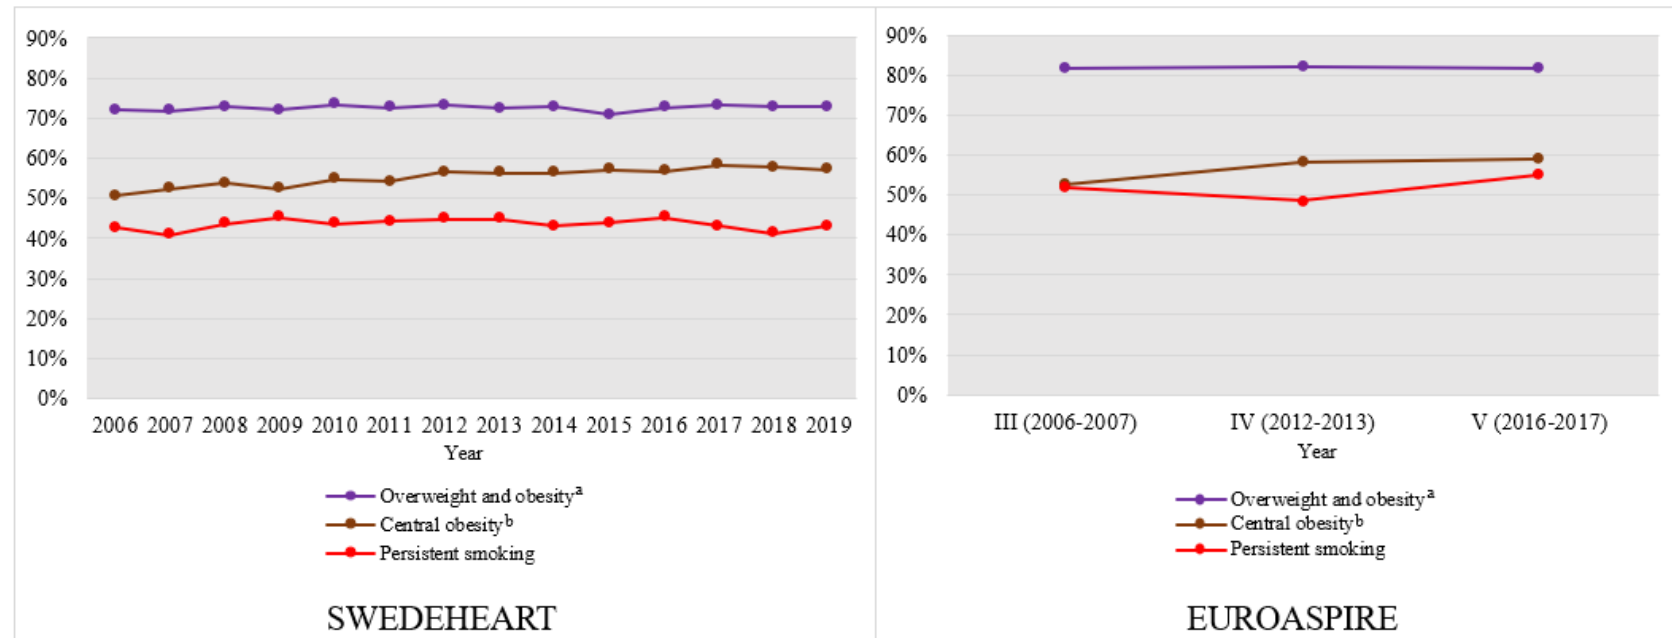

**Figure S1.** Lifestyle factors at one-year in SWEDHEART (left panel) and EUROASPIRE (right panel) where comparable data in the two cohorts was available (1-3). <sup>a</sup>Body mass index  $\geq 25$  kg/m<sup>2</sup>; <sup>b</sup>waist circumference  $\geq 102$  cm for men and  $\geq 88$  cm for women.

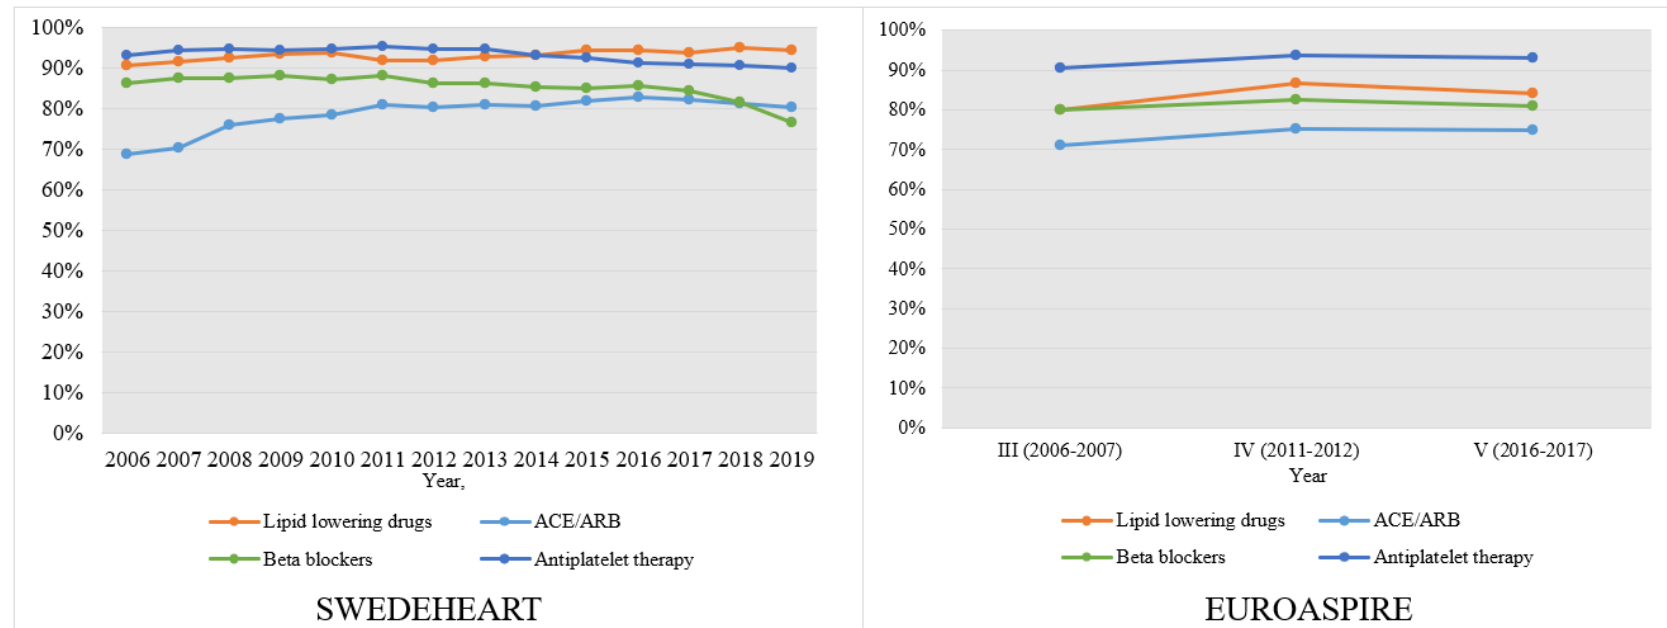

**Figure S2.** Proportion of patients at one-year follow-up for each year 2006-2019 in SWEDEHEART treated with lipid lowering therapy (statins or ezetimibe), ACEi or ARB, beta blockers or antiplatelet therapy (ASA or P2Y<sub>12</sub>-receptor antagonists). Corresponding data from the EUROASPIRE III-V surveys shown on the right panel of the figure (1-3). In EUROASPIRE lipid lowering drugs included statins, ezetimibe, fibrates, bile acid sequestrants and nicotinic acid.

ACEi, angiotensin converting enzyme inhibitors; ARB, angiotensin receptor blockers; ASA, acetylsalicylic acid.

**References**

1

1. Kotseva K, De Backer G, De Bacquer D, Ryden L, Hoes A, Grobbee D, et al. Lifestyle and impact on cardiovascular risk factor control in coronary patients across 27 countries: Results from the European Society of Cardiology ESC-EORP EUROASPIRE V registry. *Eur J Prev Cardiol.* 2019;26(8):824-35.
2. Kotseva K, Wood D, De Backer G, De Bacquer D, Pyorala K, Keil U, et al. EUROASPIRE III: a survey on the lifestyle, risk factors and use of cardioprotective drug therapies in coronary patients from 22 European countries. *Eur J Cardiovasc Prev Rehabil.* 2009;16(2):121-37.
3. Kotseva K, Wood D, De Bacquer D, De Backer G, Ryden L, Jennings C, et al. EUROASPIRE IV: A European Society of Cardiology survey on the lifestyle, risk factor and therapeutic management of coronary patients from 24 European countries. *Eur J Prev Cardiol.* 2016;23(6):636-48.
